# Supplementary material for: Photoinduced C–C bond cleavage for the synthesis of 2,4-disubstituted-1-naphthols from indenone derivatives and sulfoxonium ylide
Source: Royal Society of Chemistry journal article supplement (doi:10.1039/d2ob00958g), 2022-01-01
Supplement: d2ob00958g1.pdf [file d2ob00958g1.pdf]

# Photoinduced C-C Bond Cleavage for the Synthesis of 2,4-Disubstituted-1-Naphthols from Indenone Derivatives and Sulfoxonium Ylides

Prapas Khorphueng,<sup>c</sup> Jumreang Tummatom,<sup>a,b,\*</sup> Wacharakorn Patumanon<sup>b</sup>  
Charnsak Thongsornkleeb,<sup>a,b</sup> Sukit Chonradeenitchakul and Somsak Ruchirawat<sup>a,b</sup>

<sup>a</sup>Program on Chemical Sciences, Chulabhorn Graduate Institute, Center of Excellence on Environmental Health and Toxicology, CHE, Ministry of Education, 54 Kamphaeng Phet 6, Laksi, Bangkok 10210, Thailand

<sup>b</sup>Chulabhorn Research Institute, 54 Kamphaeng Phet 6, Laksi, Bangkok 10210, Thailand

<sup>c</sup>Department of Chemistry, Faculty of Science, Mahanakorn University of Technology, 140 Chueam Samphan Rd, Krathum Rai, Nong Chok, Bangkok, 10530, Thailand

## Supporting Information

| Contents:                                                                                                 | Page    |
|-----------------------------------------------------------------------------------------------------------|---------|
| 1. General Procedure                                                                                      | S2      |
| 2. General procedure for the synthesis of <b>1a</b> and <b>1f</b> and characterization data               | S2-S2   |
| 3. General procedure for the synthesis of <b>4a-4p</b> and characterization data                          | S3-S6   |
| 4. Copies of <sup>1</sup> H and <sup>13</sup> C spectra of compounds <b>1a</b> , <b>1f</b> , <b>4a-4p</b> | S7-S40  |
| 5. Copies of <sup>19</sup> F spectra of compounds <b>4h</b> , <b>4i</b> , <b>4j</b> and <b>4n</b>         | S41-S45 |
| 6. Copy of UV absorbance of compound <b>1a</b>                                                            | S47     |

## ■ EXPERIMENTAL SECTION

**General Procedure.** Commercial grade reagents and solvents were used without further purification, unless otherwise specified. All solvents used were purified by the solvent purification system. The oven-dried glassware (110 °C at least for 2 h) was used for all reactions. Crude reaction mixtures were concentrated under reduced pressure by removing organic solvent with the rotary evaporator. Column chromatography was performed using silica gel 60 (particle size 0.06–0.2 mm; 70–230 mesh ASTM). Analytical thin layer chromatography (TLC) was performed with silica gel 60 F254 aluminum sheets. The nuclear magnetic resonance (NMR) spectra were recorded in deuteriochloroform (CDCl<sub>3</sub>) with 300 MHz spectrometer. <sup>1</sup>H NMR and <sup>13</sup>C{<sup>1</sup>H} NMR chemical shifts (δ) were reported in ppm (part per million). The chemical shift of <sup>1</sup>H NMR spectra is reported with reference to tetramethylsilane (TMS, 0.00 ppm) as the internal reference while chemical shift of <sup>13</sup>C{<sup>1</sup>H} NMR is reported with reference to CDCl<sub>3</sub> at 77.0 ppm. Chemical shift of <sup>19</sup>F NMR is reported with reference to hexafluorobenzene as the internal reference at –164.9 ppm. Coupling constants (*J*) were reported in hertz (Hz). Infrared spectra were measured using an FT-IR spectrometer and were reported in cm<sup>-1</sup>. High resolution mass spectra (HRMS) were obtained using time-of-flight (TOF) and orbitrap.

The commercial grade chemicals were used without further purification, unless otherwise specified. All solvents used were purified by the solvent purification system. The oven-dried glassware (110 °C at least for two hours) was used for all reactions. Crude reaction mixtures were concentrated under reduced pressure by removing organic solvent with the rotary evaporator. Column chromatography was performed using silica gel 60 (particle size 0.06–0.2 mm; 70–230 mesh ASTM). Analytical thin layer chromatography (TLC) was performed with silica gel 60 F<sub>254</sub> aluminum sheets. The nuclear magnetic resonance (NMR) spectra were recorded in deuteriochloroform (CDCl<sub>3</sub>) with 300 and 600 MHz spectrometers. Chemical shifts for <sup>1</sup>H NMR and <sup>13</sup>C NMR spectra were reported in part per million (ppm, δ), relative to tetramethylsilane (TMS) as the internal reference. Coupling constants (*J*) were reported in Hertz (Hz). Infrared spectra were measured using FT-IR spectrometer and were reported in cm<sup>-1</sup>. High resolution mass spectra (HRMS) were obtained using time-of-flight (TOF).

**General procedure for the synthesis of *ortho*-ketophenylacetylenol (1a):** Indeonone **3a** (118.7 mg, 0.4204 mmol, 1.0 equiv) was dissolved in dry THF (2.0 mL) in vial with screw cap. This mixture was then added trimethylsulfoxonium chloride (59.3 mg, 0.4624 mmol, 1.1 equiv) and NaH (18.5 mg, 0.4624 mmol, 1.1 equiv) at room temperature and stirred for overnight at room temperature. The reaction was diluted with sat. NH<sub>4</sub>Cl and extracted with EtOAc. The combined organic layers were washed with brine, dried over Na<sub>2</sub>SO<sub>4</sub>, filtered and concentrated under reduced pressure to provide the crude product which was purified on silica gel (EtOAc/hexane: 3:7) to yield the corresponding product **1a** 106.6 mg (86%, white solid); mp 168.3–170.0 °C; IR (neat) ν<sub>max</sub>: 2923, 1700, 1096, 697 cm<sup>-1</sup>; <sup>1</sup>H NMR (300 MHz, CDCl<sub>3</sub>) δ 7.80 (d, 1H, *J* = 7.5 Hz), 7.48 (t, 1H, *J* = 7.5 Hz), 7.34 (t, 1H, *J* = 7.5 Hz), 7.23–7.11 (m, 11H), 2.72 (d, 1H, *J* = 4.8 Hz), 2.19 (d, 1H, *J* = 4.5 Hz); <sup>13</sup>C{<sup>1</sup>H} NMR (75 MHz, CDCl<sub>3</sub>) δ 202.3, 156.7, 134.24, 134.16, 133.5, 133.0, 130.0, 129.5, 128.3, 128.2, 127.4, 127.3, 127.2, 124.9, 124.2,

49.6, 45.0, 39.8; HRMS (ESI-TOF)  $m/z$ : calcd for  $C_{22}H_{17}O$   $[M+Na]^+$  297.1274; found 297.1268.

**General procedure for the synthesis of *ortho*-ketophenylacetylenol (1f):** Indeonone **3f** (95.3 mg, 0.3216 mmol, 1.0 equiv) was dissolved in dry THF (2.0 mL) in vial with screw cap. This mixture was then added trimethylsulfoxonium chloride (45.1 mg, 0.3537 mmol, 1.1 equiv), TEMPO (50.3 mg, 0.3216 mmol, 1.0 equiv) and NaH (14.0 mg, 0.3537 mmol, 1.1 equiv) at room temperature and stirred for overnight at room temperature. The reaction was diluted with sat.  $NH_4Cl$  and extracted with EtOAc. The combined organic layers were washed with brine, dried over  $Na_2SO_4$ , filtered and concentrated under reduced pressure to provide the crude product which was purified on silica gel (EtOAc/hexane: 3:7) to yield the corresponding product **1f** 43.2 mg (43%, white solid); mp 154.1-155.5 °C; IR (neat)  $\nu_{max}$ : 2920, 1707, 947, 698  $cm^{-1}$ ;  $^1H$  NMR (400 MHz,  $CDCl_3$ )  $\delta$  7.71 (d, 1H,  $J = 7.5$  Hz), 7.46 (t, 1H,  $J = 7.5, 0.9$  Hz), 7.25 (t, 1H,  $J = 7.1$  Hz), 7.17-7.10 (m, 6H), 6.98 (t, 1H,  $J = 7.1$  Hz), 6.88-6.85 (m, 2H), 6.81 (d, 1H,  $J = 7.6$  Hz), 2.62 (d, 1H,  $J = 4.7$  Hz), 2.13 (s, 3H), 2.09 (d, 1H,  $J = 4.7$  Hz);  $^{13}C$  {1H} NMR (100 MHz,  $CDCl_3$ )  $\delta$  202.1, 156.4, 137.2, 133.9, 133.7, 133.1, 132.4, 130.6, 129.2, 127.9, 127.64, 127.60, 127.0, 126.8, 126.6, 124.5, 123.8, 49.2, 44.5, 39.4, 20.9; HRMS (ESI-TOF)  $m/z$ : calcd for  $C_{23}H_{19}O$   $[M+H]^+$  311.1430; found 311.1428.

**General procedure for the synthesis of *ortho*-ketophenylacetylenol (4):** Indeonone **3a** (107.2 mg, 0.3797 mmol, 1.0 equiv) was dissolved in dry THF (2.0 mL) in vial with screw cap. This mixture was then added trimethylsulfoxonium chloride (53.5 mg, 0.4176 mmol, 1.1 equiv) and NaH (16.7 mg, 0.4176 mmol, 1.1 equiv) at room temperature and stirred under photoirradiation (390-nm UV-LED light (40 Watt) from Kessil PR160-390nm) for overnight at room temperature. The reaction was diluted with sat.  $NH_4Cl$  and extracted with EtOAc. The combined organic layers were washed with brine, dried over  $Na_2SO_4$ , filtered and concentrated under reduced pressure to provide the crude product which was purified on silica gel (EtOAc/hexane: 1:9) to yield the corresponding product **4a** 90.8 mg (81%, pale brown solid); mp 103.6-104.8 °C; IR (neat)  $\nu_{max}$ : 3536, 1372, 1211, 759  $cm^{-1}$ ;  $^1H$  NMR (300 MHz,  $CDCl_3$ )  $\delta$  8.39 (d, 1H,  $J = 8.0$  Hz), 7.90 (d, 1H,  $J = 8.1$  Hz), 7.57-7.34 (m, 13H), 5.89 (s, 1H);  $^{13}C$  {1H} NMR (75 MHz,  $CDCl_3$ )  $\delta$  147.3, 140.6, 137.2, 132.8, 132.1, 130.3, 129.6, 129.4, 128.5, 128.2, 128.0, 127.0, 126.6, 125.8, 125.5, 124.5, 122.7, 120.8; HRMS (ESI-TOF)  $m/z$ : calcd for  $C_{22}H_{17}O$   $[M+H]^+$  297.1274; found 297.1260.

*2-phenyl-4-(p-tolyl)naphthalen-1-ol (4b)*. Yield 84.5 mg (79%, yellow oil); IR (neat)  $\nu_{max}$ : 3546, 2923, 1662, 1265, 736  $cm^{-1}$ ;  $^1H$  NMR (400 MHz, Acetone- $d_6$ )  $\delta$  8.48 (d, 1H,  $J = 8.0$  Hz), 8.13 (s, 1H), 7.90 (d, 1H,  $J = 8.0$  Hz), 7.64 (d, 2H,  $J = 7.6$  Hz), 7.56-7.28 (m, 10H), 2.40 (s, 3H);  $^{13}C$  {1H} NMR (100 MHz, Acetone- $d_6$ )  $\delta$  149.1, 139.4, 138.6, 137.3, 133.3, 133.0, 130.9, 130.6, 130.0, 129.8, 129.5, 128.0, 127.9, 127.5, 127.1, 126.8, 126.5, 126.0, 123.6, 123.1, 21.2; HRMS (ESI-TOF)  $m/z$ : calcd for  $C_{23}H_{17}O$   $[M-H]^-$  309.1285; found 309.1282.

*4-(4-methoxyphenyl)-2-phenylnaphthalen-1-ol (4c)*. Yield 85.1 mg (80%, brown solid); mp 114.1-115.8 °C; IR (neat)  $\nu_{max}$ : 3537, 2907, 1243, 765  $cm^{-1}$ ;  $^1H$  NMR (300 MHz,  $CDCl_3$ )  $\delta$  8.39 (d, 1H,  $J = 7.8$  Hz), 7.93 (d, 1H,  $J = 8.1$  Hz), 7.62-7.44 (m, 9H), 7.34 (s, 1H), 7.04 (d, 2H,  $J = 8.4$  Hz), 5.89 (s, 1H), 3.91 (s, 3H);  $^{13}C$  {1H} NMR (75 MHz,  $CDCl_3$ )  $\delta$  158.7, 147.1, 137.3, 132.9, 132.4, 132.3, 131.2, 129.6, 129.3, 128.4, 127.9, 126.4, 125.8, 125.4, 124.5, 122.6, 120.8, 113.7, 55.3; HRMS (ESI-TOF)  $m/z$ : calcd for  $C_{23}H_{17}O_2$   $[M-H]^-$  325.1234; found 325.1226.

*4-(4-chlorophenyl)-2-phenylnaphthalen-1-ol (4d)*. Yield 78.5 mg (74%, yellow oil); IR (neat)  $\nu_{\text{max}}$ : 3536, 1490, 1371, 1210, 757  $\text{cm}^{-1}$ ;  $^1\text{H}$  NMR (400 MHz, Acetone- $d_6$ )  $\delta$  8.48 (d, 1H,  $J = 8.0$  Hz), 8.25 (br s, 1H), 7.83 (d, 1H,  $J = 8.4$  Hz), 7.63 (d, 2H,  $J = 7.2$  Hz), 7.57-7.44 (m, 8H), 7.37-7.33 (m, 2H);  $^{13}\text{C}\{1\text{H}\}$  NMR (100 MHz, Acetone- $d_6$ )  $\delta$  149.5, 140.2, 139.1, 133.3, 132.63, 132.57, 131.7, 130.7, 130.3, 129.5, 129.2, 128.1, 127.4, 126.8, 126.2, 126.0, 123.7, 123.1; HRMS (ESI-TOF)  $m/z$ : calcd for  $\text{C}_{22}\text{H}_{14}\text{ClO}$  (Cl-35)  $[\text{M}-\text{H}]^-$  329.0739; found 329.0741.

*4-phenyl-2-(p-tolyl)naphthalen-1-ol (4e)*. Yield 99.6 mg (79%, yellow oil); IR (neat)  $\nu_{\text{max}}$ : 3527, 2921, 1514, 1210, 772  $\text{cm}^{-1}$ ;  $^1\text{H}$  NMR (400 MHz, Acetone- $d_6$ )  $\delta$  8.46 (d, 1H,  $J = 7.2$  Hz), 8.09 (s, 1H), 7.87 (d, 1H,  $J = 8.0$  Hz), 7.53-7.27 (m, 12H), 2.37 (s, 3H);  $^{13}\text{C}\{1\text{H}\}$  NMR (100 MHz, Acetone- $d_6$ )  $\delta$  149.2, 141.6, 137.5, 136.2, 133.2, 132.8, 131.0, 130.5, 130.2, 129.2, 127.8, 127.1, 126.8, 126.3, 126.0, 123.6, 123.0, 21.2; HRMS (ESI-TOF)  $m/z$ : calcd for  $\text{C}_{23}\text{H}_{17}\text{O}$   $[\text{M}-\text{H}]^-$  309.1285; found 309.1281.

*4-phenyl-2-(m-tolyl)naphthalen-1-ol (4f)*. Yield 73.5 mg (56%, brown oil); IR (neat)  $\nu_{\text{max}}$ : 3534, 2920, 1600, 1370, 701  $\text{cm}^{-1}$ ;  $^1\text{H}$  NMR (400 MHz, Acetone- $d_6$ )  $\delta$  8.45 (d, 1H,  $J = 8.4$  Hz), 8.10 (s, 1H), 7.86 (d, 1H,  $J = 8.4$  Hz), 7.57-7.32 (m, 11H), 7.19 (d, 1H,  $J = 7.2$  Hz), 2.40 (s, 3H);  $^{13}\text{C}\{1\text{H}\}$  NMR (100 MHz, Acetone- $d_6$ )  $\delta$  149.2, 141.6, 139.11, 139.06, 133.1, 132.8, 131.2, 131.0, 130.1, 129.5, 129.3, 128.7, 127.8, 127.6, 127.1, 126.7, 126.3, 126.0, 123.6, 123.0, 21.5; HRMS (ESI-TOF)  $m/z$ : calcd for  $\text{C}_{23}\text{H}_{17}\text{O}$   $[\text{M}-\text{H}]^-$  309.1285; found 309.1285.

*2-(4-hexylphenyl)-4-phenylnaphthalen-1-ol (4g)*. Yield 66.4 mg (58%, brown oil); IR (neat)  $\nu_{\text{max}}$ : 3544, 2927, 1372, 1048, 702  $\text{cm}^{-1}$ ;  $^1\text{H}$  NMR (400 MHz, Acetone- $d_6$ )  $\delta$  8.46 (d, 1H,  $J = 8.4$  Hz), 8.09 (s, 1H), 7.87 (d, 1H,  $J = 8.4$  Hz), 7.56-7.40 (m, 9H), 7.33-7.28 (m, 3H), 2.66 (t, 1H,  $J = 7.6$  Hz), 1.66 (quint, 2H,  $J = 7.2$  Hz), 1.41-1.28 (m, 6H), 0.89 (t, 3H,  $J = 6.8$  Hz);  $^{13}\text{C}\{1\text{H}\}$  NMR (100 MHz, Acetone- $d_6$ )  $\delta$  149.2, 142.6, 141.6, 136.5, 133.2, 132.7, 131.0, 130.4, 130.2, 129.6, 129.1, 127.7, 127.0, 126.8, 126.3, 126.0, 123.6, 123.0, 36.2, 32.4, 32.3, 29.7, 23.3, 14.4; HRMS (ESI-TOF)  $m/z$ : calcd for  $\text{C}_{28}\text{H}_{27}\text{O}$   $[\text{M}-\text{H}]^-$  379.2067; found 379.2060.

*2-(2-fluorophenyl)-4-phenylnaphthalen-1-ol (4h)*. Yield 81.7 mg (77%, yellow oil); IR (neat)  $\nu_{\text{max}}$ : 3545, 1572, 1492, 1211, 758  $\text{cm}^{-1}$ ;  $^1\text{H}$  NMR (400 MHz, Acetone- $d_6$ )  $\delta$  8.47 (d, 1H,  $J = 7.2$  Hz), 7.89 (d, 1H,  $J = 8.0$  Hz), 7.58-7.39 (m, 10H), 7.30-7.21 (m, 3H);  $^{13}\text{C}\{1\text{H}\}$  NMR (100 MHz, Acetone- $d_6$ )  $\delta$  161.5 (d,  $J_{\text{C-F}} = 244$  Hz), 150.5, 150.4, 141.6, 133.6 (d,  $J_{\text{C-F}} = 4$  Hz), 133.4, 133.1, 131.2, 130.7 (d,  $J_{\text{C-F}} = 8$  Hz), 130.5, 129.4, 128.1, 127.7, 126.9, 126.6, 126.3, 125.6 (d,  $J_{\text{C-F}} = 4$  Hz), 123.9, 117.4, 116.8 (d,  $J_{\text{C-F}} = 22$  Hz);  $^{19}\text{F}$  NMR (282 MHz,  $\text{CDCl}_3$ )  $\delta$  -116.6 (s), HRMS (ESI-TOF)  $m/z$ : calcd for  $\text{C}_{22}\text{H}_{14}\text{FO}$   $[\text{M}-\text{H}]^-$  313.1034; found 313.1030.

*2-(3-fluorophenyl)-4-phenylnaphthalen-1-ol (4i)*. Yield 96.0 mg (77%, brown oil); IR (neat)  $\nu_{\text{max}}$ : 3545, 1584, 1212, 771  $\text{cm}^{-1}$ ;  $^1\text{H}$  NMR (400 MHz, Acetone- $d_6$ )  $\delta$  8.49 (d, 1H,  $J = 8.4$  Hz), 7.88 (d, 1H,  $J = 8.0$  Hz), 7.57-7.36 (m, 10H), 7.12 (br s, 1H);  $^{13}\text{C}\{1\text{H}\}$  NMR (100 MHz, Acetone- $d_6$ )  $\delta$  163.7 (d,  $J_{\text{C-F}} = 242$  Hz), 149.4, 141.8 (d,  $J_{\text{C-F}} = 8$  Hz), 141.4, 133.4, 133.1, 131.2 (d,  $J_{\text{C-F}} = 8$  Hz), 131.0, 129.7, 129.6 (d,  $J_{\text{C-F}} = 5$  Hz), 129.2, 127.8, 127.4, 126.9, 126.6, 126.3 (d,  $J_{\text{C-F}} = 18$  Hz), 123.6, 122.1, 117.4 (d,  $J_{\text{C-F}} = 21$  Hz), 114.6 (d,  $J_{\text{C-F}} = 22$  Hz);  $^{19}\text{F}$  NMR (282 MHz,  $\text{CDCl}_3$ )  $\delta$  -119.9 (s), HRMS (ESI-TOF)  $m/z$ : calcd for  $\text{C}_{22}\text{H}_{14}\text{FO}$   $[\text{M}-\text{H}]^-$  313.1034; found 313.1033.

2-(4-fluorophenyl)-4-phenylnaphthalen-1-ol (**4j**). Yield 39.6 mg (67%, yellow oil); mp 69.8-70.2 °C; IR (neat)  $\nu_{\text{max}}$ : 3420, 2928, 1514, 1247, 760  $\text{cm}^{-1}$ ;  $^1\text{H}$  NMR (400 MHz,  $\text{CDCl}_3+\text{MeOH-d}_4$ )  $\delta$  8.37 (d, 1H,  $J = 8.4$  Hz), 7.90 (d, 1H,  $J = 8.4$  Hz), 7.58-7.40 (m, 9H), 7.29-7.19 (m, 3H), 4.84 (br s, 1H);  $^{13}\text{C}\{1\text{H}\}$  NMR (100 MHz,  $\text{CDCl}_3+\text{MeOH-d}_4$ )  $\delta$  162.3 (d,  $J_{\text{C-F}} = 246$  Hz), 147.4, 140.4, 133.4 (d,  $J_{\text{C-F}} = 2$  Hz), 132.8, 132.0, 131.2 (d,  $J_{\text{C-F}} = 7$  Hz), 130.2, 128.6, 128.2, 127.0, 126.5, 125.8, 125.5, 124.7, 122.5, 120.1, 116.2 (d,  $J_{\text{C-F}} = 21$  Hz);  $^{19}\text{F}$  NMR (282 MHz,  $\text{CDCl}_3$ )  $\delta$  -114.2 (s), HRMS (ESI-TOF)  $m/z$ : calcd for  $\text{C}_{22}\text{H}_{14}\text{FO}$   $[\text{M-H}]^-$  313.1034; found 313.1031.

2-(3-chlorophenyl)-4-phenylnaphthalen-1-ol (**4k**). Yield 76.1 mg (70%, yellow oil); IR (neat)  $\nu_{\text{max}}$ : 3539, 1594, 1372, 1210, 700  $\text{cm}^{-1}$ ;  $^1\text{H}$  NMR (400 MHz, Acetone- $\text{d}_6$ )  $\delta$  8.57 (br s, 1H), 8.46 (d, 1H,  $J = 8.0$  Hz), 7.87 (d, 1H,  $J = 8.4$  Hz), 7.70 (s, 1H), 7.67-7.33 (m, 11H);  $^{13}\text{C}\{1\text{H}\}$  NMR (100 MHz, Acetone- $\text{d}_6$ )  $\delta$  148.6, 140.8, 140.5, 133.8, 132.6, 132.2, 130.2, 130.1, 129.7, 128.9, 128.4, 127.1, 127.0, 126.6, 126.1, 125.6, 125.4, 122.7, 121.1; HRMS (ESI-TOF)  $m/z$ : calcd for  $\text{C}_{22}\text{H}_{14}\text{ClO}$  (Cl-35)  $[\text{M-H}]^-$  329.0739; found 329.0734.

2-(4-chlorophenyl)-4-phenylnaphthalen-1-ol (**4l**). Yield 86.7 mg (79%, yellow oil); IR (neat)  $\nu_{\text{max}}$ : 3541, 1491, 1210, 1046, 700  $\text{cm}^{-1}$ ;  $^1\text{H}$  NMR (400 MHz, Acetone- $\text{d}_6$ )  $\delta$  8.45 (d, 1H,  $J = 8.1$  Hz), 8.37 (br s, 1H), 7.87 (d, 1H,  $J = 8.4$  Hz), 7.69-7.64 (m, 2H), 7.58-7.54 (m, 1H), 7.52-7.48 (m, 6H), 7.44-7.42 (m, 1H);  $^{13}\text{C}\{1\text{H}\}$  NMR (100 MHz, Acetone- $\text{d}_6$ )  $\delta$  149.4, 141.4, 138.2, 133.5, 133.4, 133.1, 132.4, 131.0, 129.8, 129.5, 129.2, 127.9, 127.4, 126.9, 126.5, 126.3, 123.6, 122.1; HRMS (ESI-TOF)  $m/z$ : calcd for  $\text{C}_{22}\text{H}_{14}\text{ClO}$  (Cl-35)  $[\text{M-H}]^-$  329.0739; found 329.0733.

2-(3-methoxyphenyl)-4-phenylnaphthalen-1-ol (**4m**). Yield 89.6 mg (78%, brown oil); IR (neat)  $\nu_{\text{max}}$ : 3525, 2937, 1596, 1215, 701  $\text{cm}^{-1}$ ;  $^1\text{H}$  NMR (400 MHz, Acetone- $\text{d}_6$ )  $\delta$  8.48 (d, 1H,  $J = 8.4$  Hz), 8.14 (s, 1H), 7.88 (d, 1H,  $J = 8.4$  Hz), 7.57-7.47 (m, 6H), 7.42-7.36 (m, 3H), 7.22-7.19 (m, 2H), 6.93 (d, 1H,  $J = 6.4$  Hz), 3.84 (s, 3H);  $^{13}\text{C}\{1\text{H}\}$  NMR (100 MHz, Acetone- $\text{d}_6$ )  $\delta$  160.9, 149.2, 141.5, 133.1, 132.9, 131.0, 130.7, 130.0, 129.2, 127.8, 127.2, 126.7, 126.3, 126.1, 123.7, 122.9, 122.8, 116.0, 113.9, 55.6; HRMS (ESI-TOF)  $m/z$ : calcd for  $\text{C}_{23}\text{H}_{17}\text{O}_2$   $[\text{M-H}]^-$  325.1234; found 325.1227.

2-butyl-4-(4-fluorophenyl)naphthalen-1-ol (**4n**). Yield 13.0 mg (20%, brown solid); mp 109.9-111.7 °C; IR (neat)  $\nu_{\text{max}}$ : 3422, 2930, 1515, 1174, 700  $\text{cm}^{-1}$ ;  $^1\text{H}$  NMR (300 MHz,  $\text{CDCl}_3$ )  $\delta$  7.86-7.80 (m, 2H), 7.50-7.40 (m, 4H), 7.19-7.11 (m, 2H), 5.14 (s, 1H), 2.76 (t, 2H,  $J = 7.8$  Hz), 1.75-1.65 (m, 2H), 1.58 (s, 1H), 1.51-1.39 (m, 2H), 0.96 (t, 3H,  $J = 7.2$  Hz);  $^{13}\text{C}\{1\text{H}\}$  NMR (75 MHz,  $\text{CDCl}_3$ )  $\delta$  160.5 (d,  $J_{\text{C-F}} = 244$  Hz), 147.2 (d,  $J_{\text{C-F}} = 5$  Hz), 140.6, 133.0, 130.2, 129.8, 128.6 (d,  $J_{\text{C-F}} = 5$  Hz), 128.32, 128.28, 127.1, 125.6 (d,  $J_{\text{C-F}} = 9$  Hz), 115.7 (d,  $J_{\text{C-F}} = 25$  Hz), 105.4 (d,  $J_{\text{C-F}} = 5$  Hz), 32.2, 29.7, 22.7, 14.0.  $^{19}\text{F}$  NMR (376 MHz,  $\text{CDCl}_3$ )  $\delta$  -118.5 (s), HRMS (ESI-TOF)  $m/z$ : calcd for  $\text{C}_{20}\text{H}_{18}\text{FO}$   $[\text{M-H}]^-$  293.1347; found 293.1350.

2-butyl-4-(4-methoxyphenyl)naphthalen-1-ol (**4o**). Yield 21.6 mg (36%, yellow solid); IR (neat)  $\nu_{\text{max}}$ : 3543, 2924, 1509, 1224, 702  $\text{cm}^{-1}$ ;  $^1\text{H}$  NMR (400 MHz,  $\text{CDCl}_3+\text{MeOH-d}_4$ )  $\delta$  8.20 (d, 1H,  $J = 8.4$  Hz), 7.85 (d, 1H,  $J = 8.4$  Hz), 7.47 (t, 1H,  $J = 7.2$  Hz), 7.40-7.36 (m, 3H), 7.18 (s, 1H), 7.01 (d, 2H,  $J = 8.4$  Hz), 5.26 (d, 1H,  $J = 3.6$  Hz), 3.88 (s, 3H), 2.77 (t, 2H,  $J = 7.6$  Hz), 1.73-1.65 (m, 2H), 1.48-1.39 (m, 2H), 0.95 (t, 3H,  $J = 7.2$  Hz);  $^{13}\text{C}\{1\text{H}\}$  NMR (100 MHz,  $\text{CDCl}_3+\text{MeOH-d}_4$ )  $\delta$  158.6, 147.4, 133.2, 132.4, 131.4, 131.2, 129.2, 125.9, 125.4, 125.1,

124.6, 121.3, 120.8, 113.6, 55.3, 32.3, 29.7, 22.7, 14.0; HRMS (ESI-TOF)  $m/z$ : calcd for  $C_{21}H_{21}O_2$   $[M-H]^-$  305.1547; found 305.1548.

*6-methoxy-4-(3-methoxyphenyl)-2-phenylnaphthalen-1-ol (4p)*. Yield 75.1 mg (71%, brown oil); IR (neat)  $\nu_{max}$ : 3536, 2936, 1599, 1436, 1221, 702  $cm^{-1}$ ;  $^1H$  NMR (400 MHz, Acetone- $d_6$ )  $\delta$  8.05 (s, 1H), 7.84-7.78 (m, 2H), 7.65 (d, 2H,  $J = 6.4$  Hz), 7.47-7.37 (m, 4H), 7.20-6.97 (m, 5H), 3.95 (s, 3H), 3.84 (s, 3H);  $^{13}C\{^1H\}$  NMR (100 MHz, Acetone- $d_6$ )  $\delta$  160.7, 158.5, 148.3, 143.1, 139.5, 133.2, 130.6, 130.1, 129.9, 129.5, 128.8, 128.2, 128.0, 127.6, 123.7, 123.3, 119.5, 116.5, 113.4, 102.0, 55.6, 55.5; HRMS (ESI-TOF)  $m/z$ : calcd for  $C_{24}H_{19}O_3$   $[M-H]^-$  355.1340; found 355.1332.

7.810  
7.785  
7.503  
7.478  
7.454  
7.365  
7.341  
7.316  
7.233  
7.227  
7.216  
7.212  
7.197  
7.185  
7.161  
7.145  
7.134  
7.111

2.729  
2.713

2.196  
2.181

JRT-9-179A 300 MHz, CDCl<sub>3</sub>

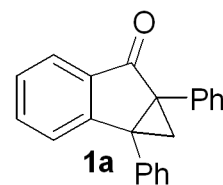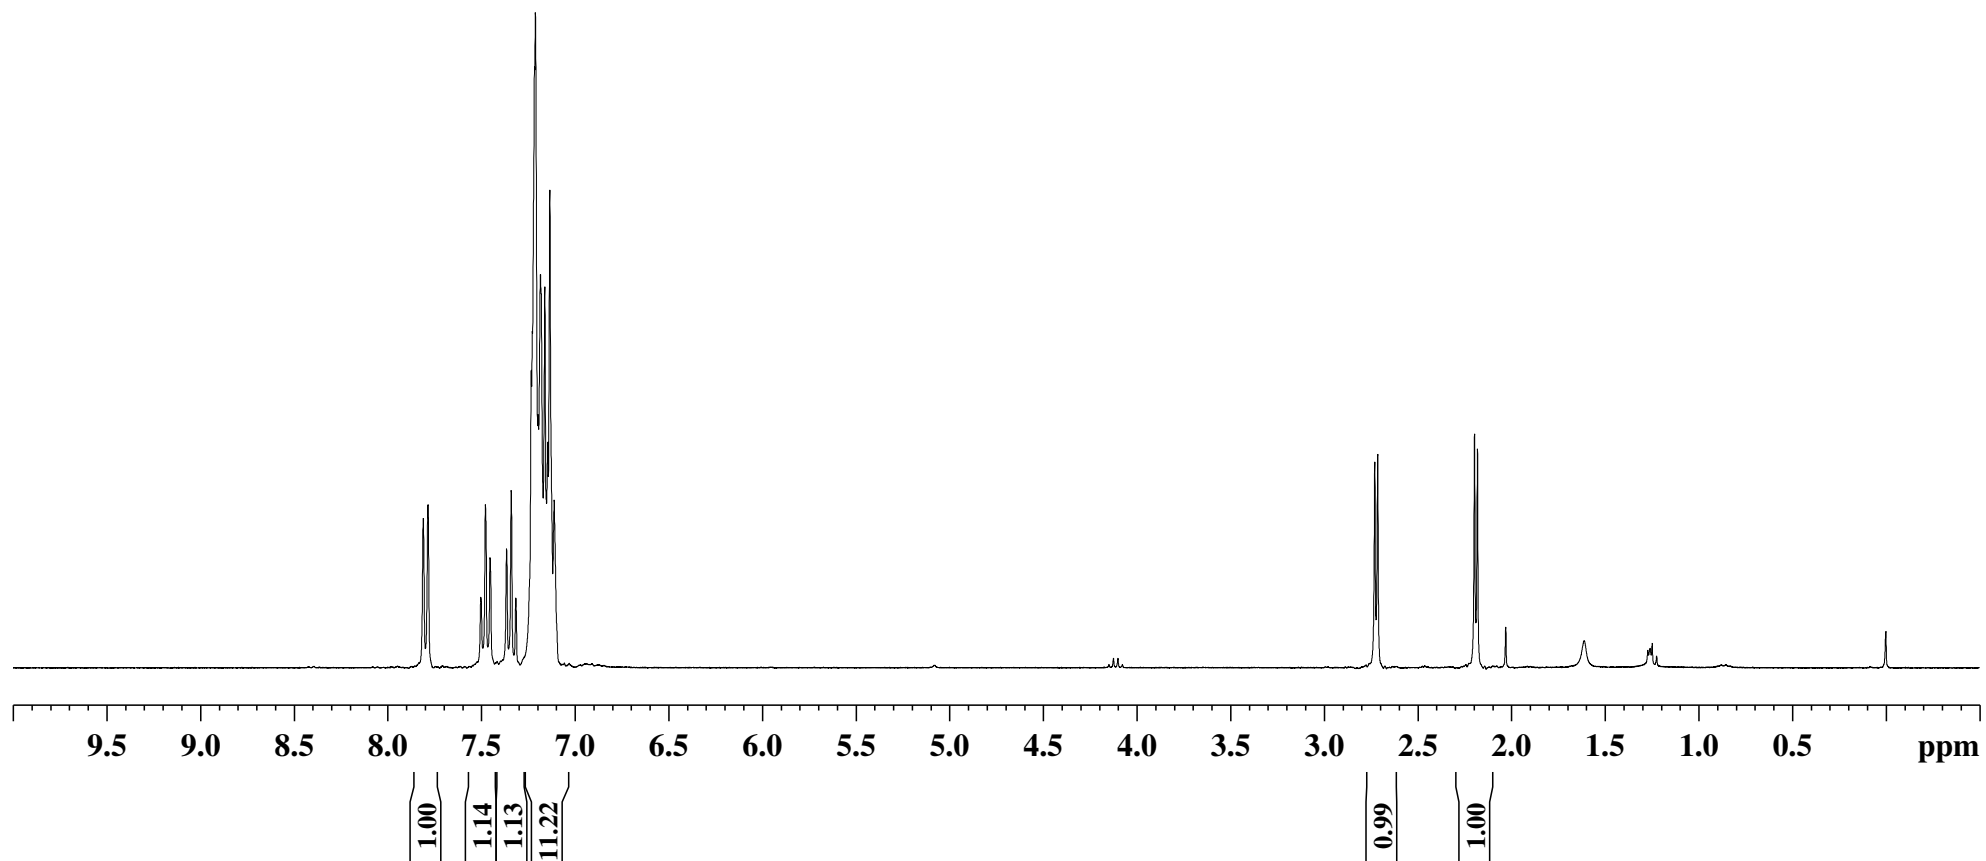

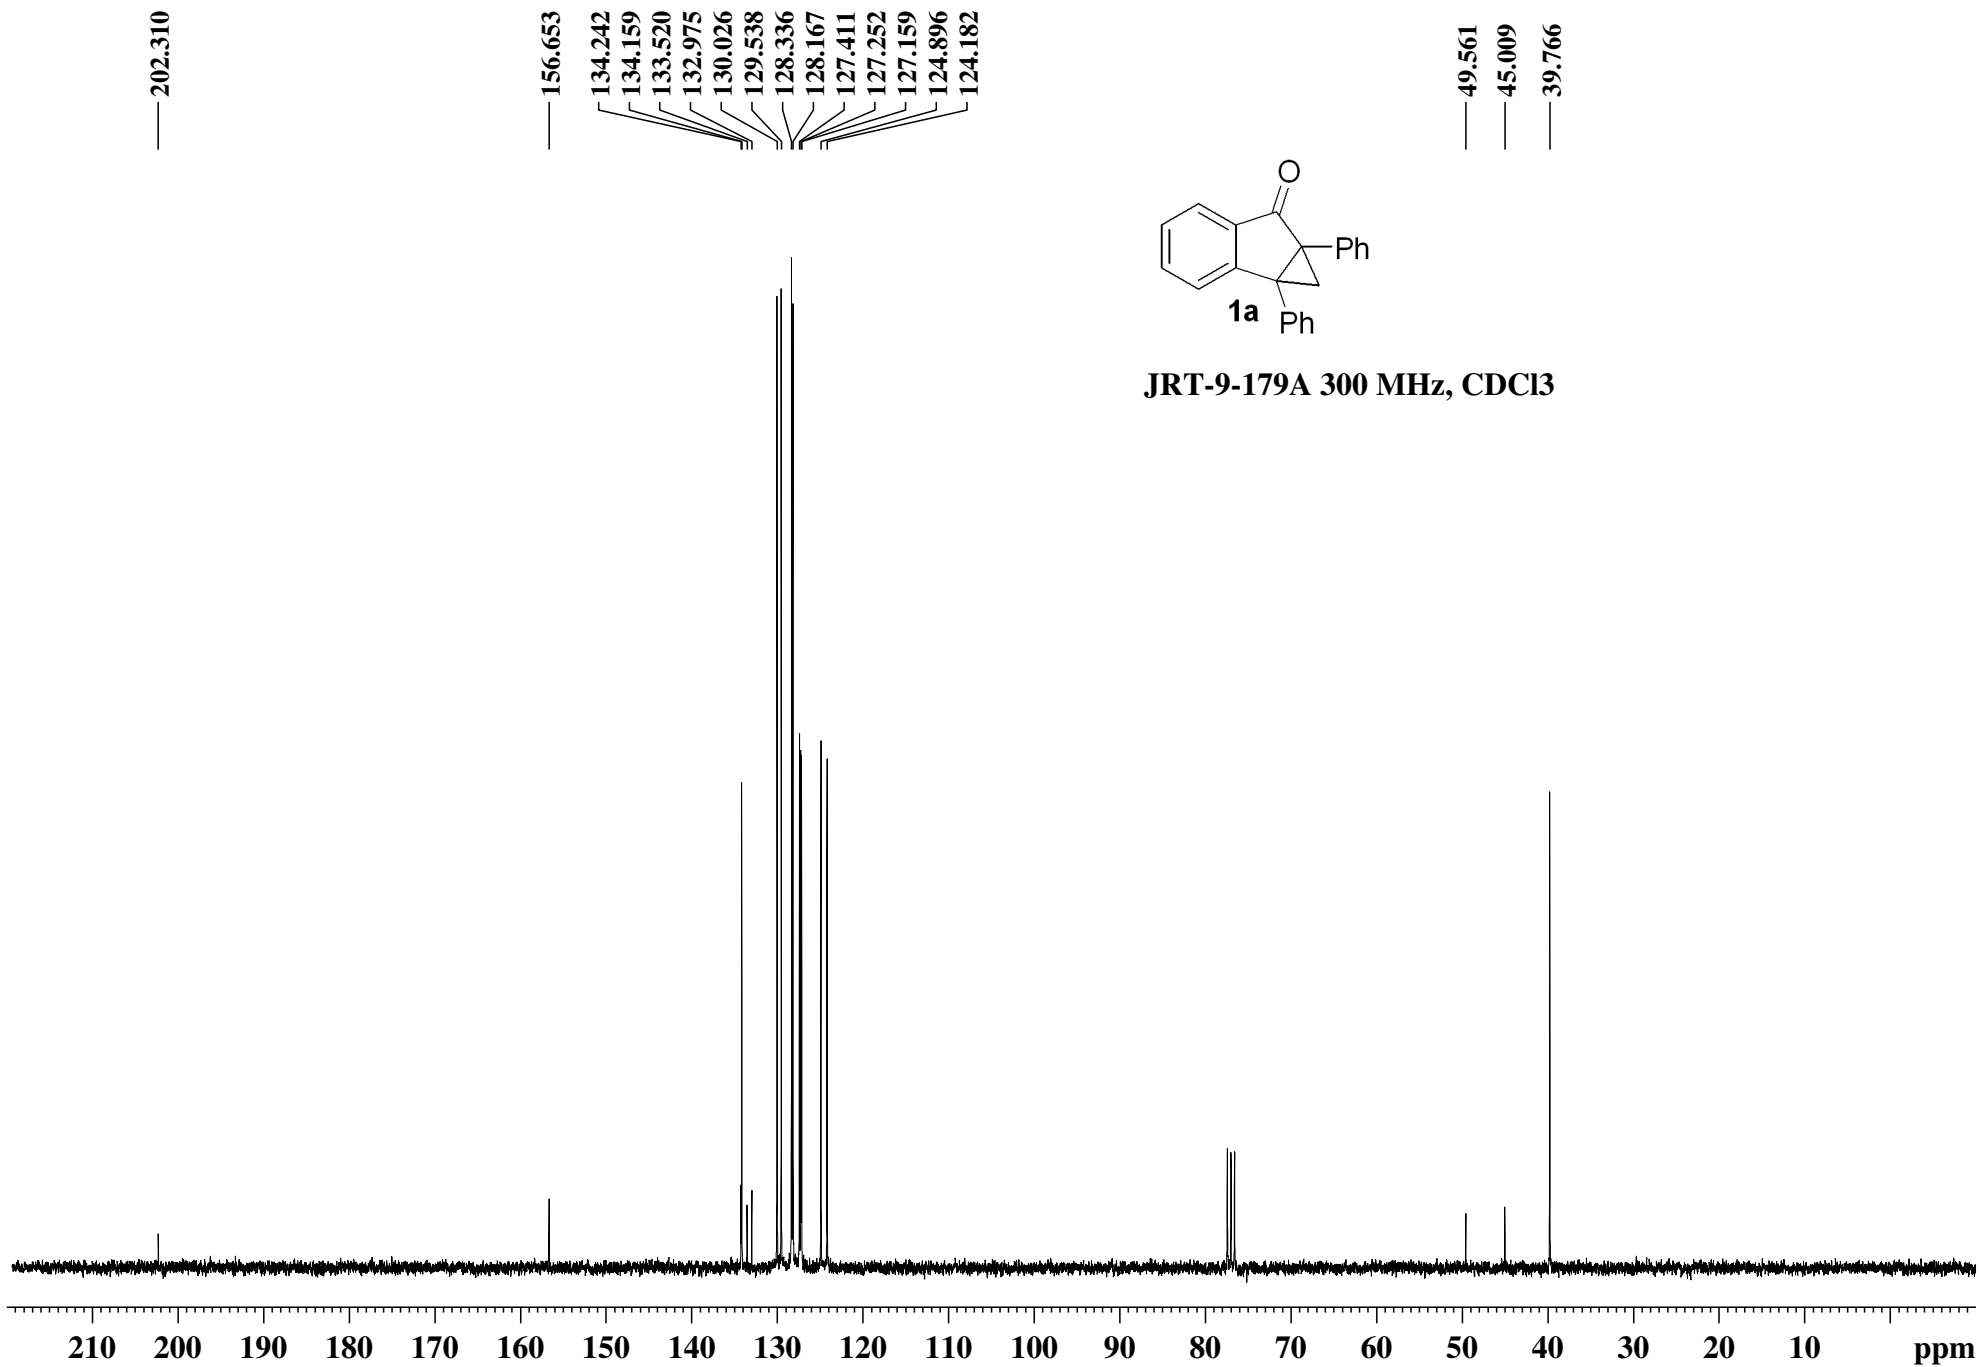



7.720  
7.702  
7.410  
7.408  
7.391  
7.389  
7.373  
7.370  
7.272  
7.254  
7.236  
7.169  
7.153  
7.149  
7.138  
7.117  
7.106  
7.097  
6.997  
6.979  
6.960  
6.883  
6.872  
6.853  
6.824  
6.805

2.625  
2.613  
2.132  
2.097  
2.086

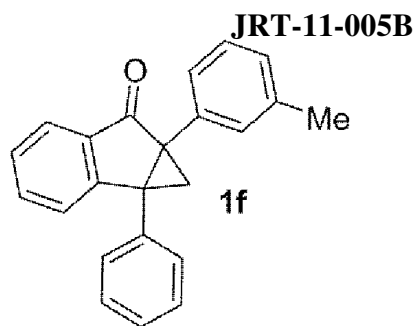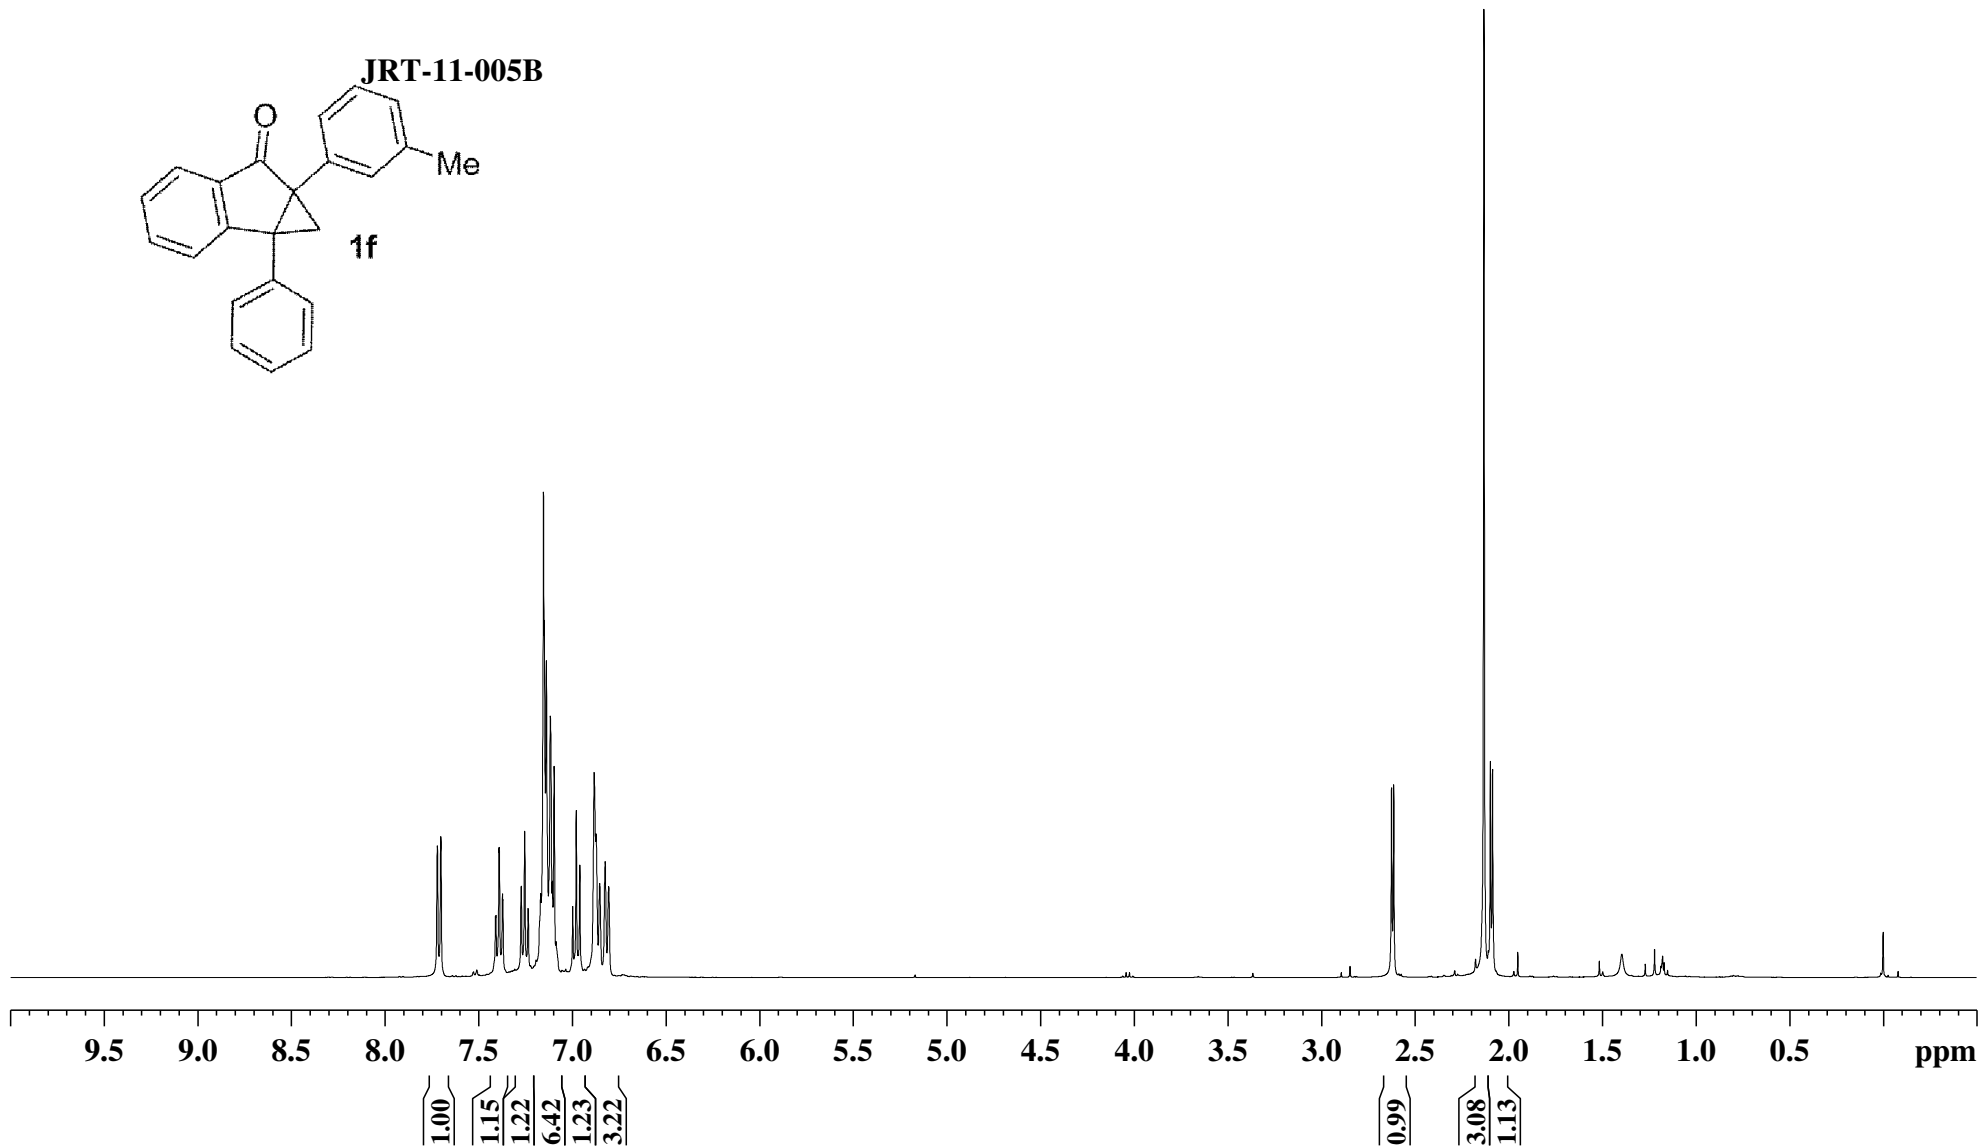

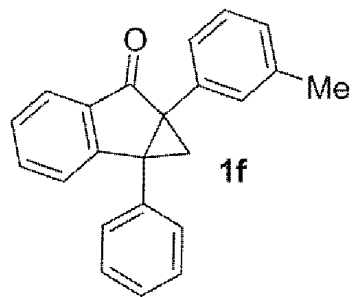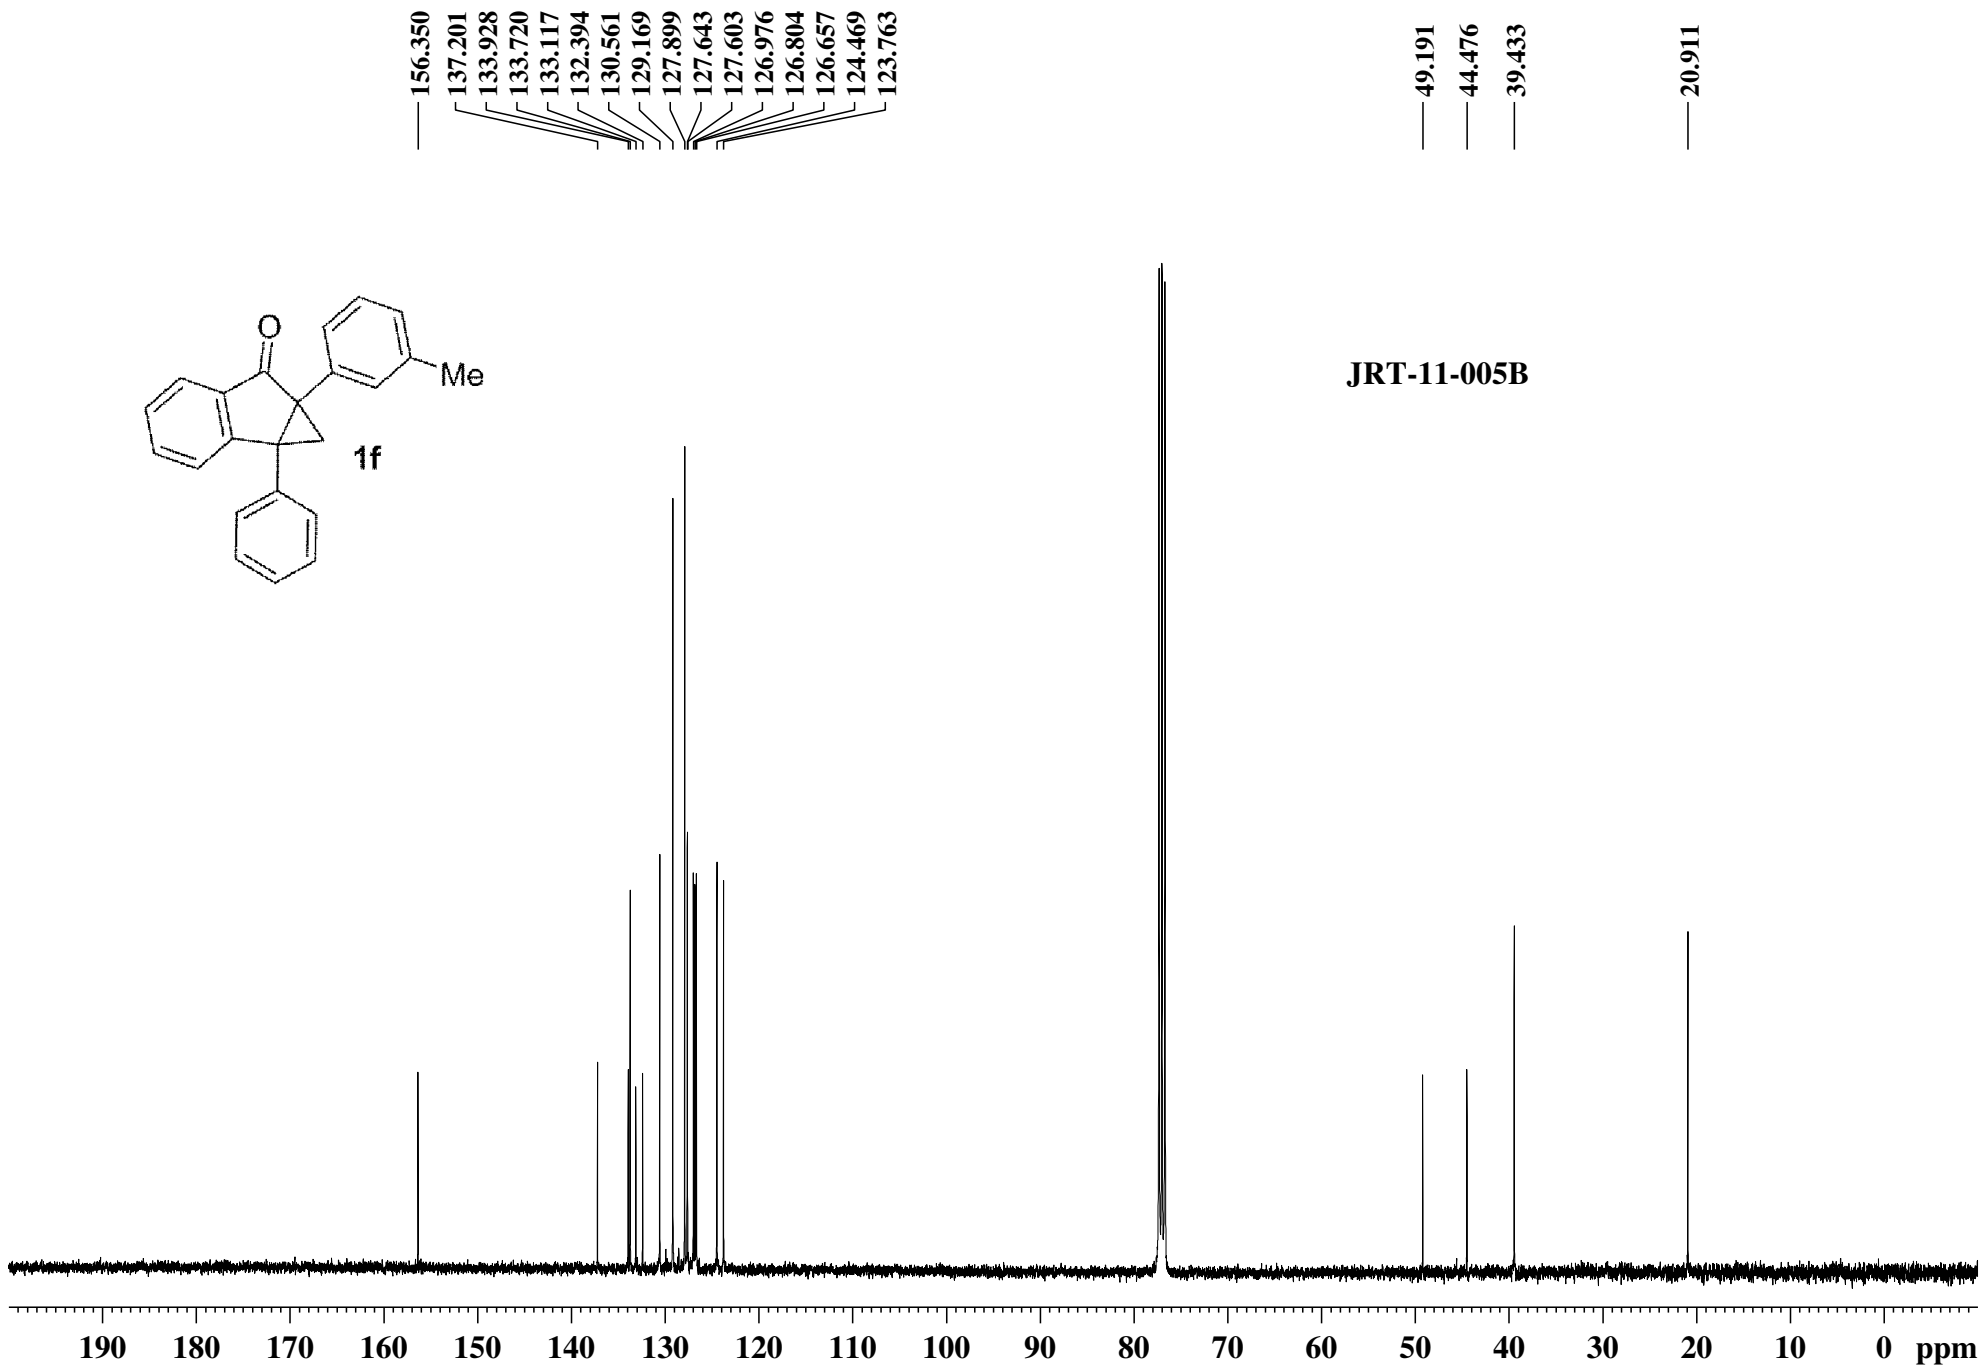

8.391  
8.365  
7.915  
7.888  
7.568  
7.535  
7.500  
7.465  
7.339  
7.245

5.892

JRT-9-155A 300 MHz, CDCl<sub>3</sub> 4a

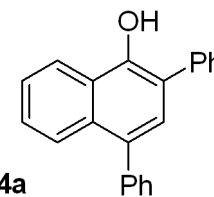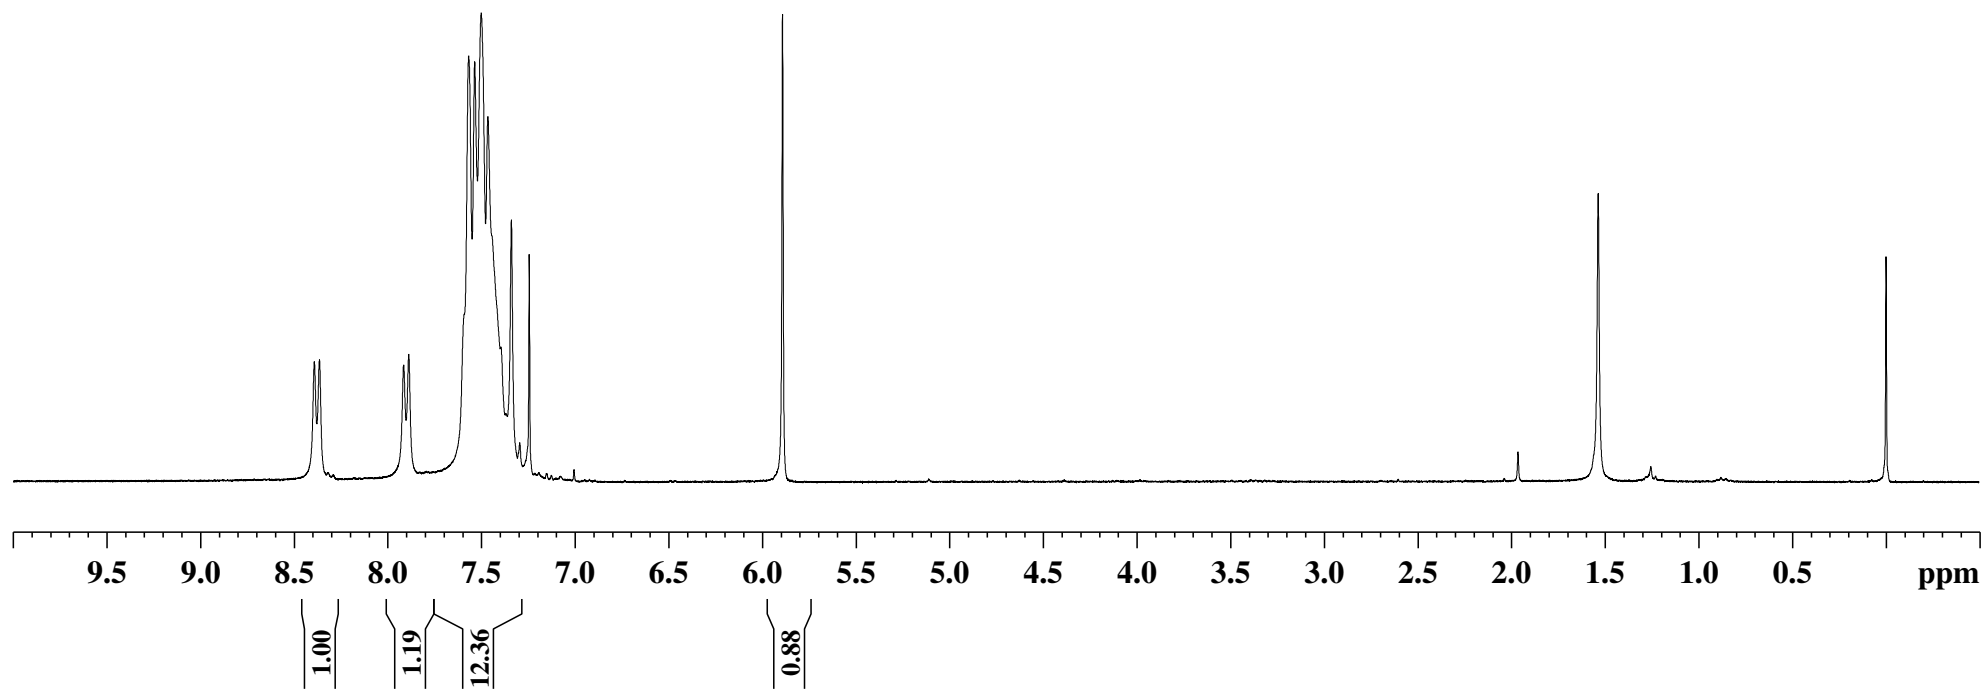

147.309  
140.564  
137.210  
132.819  
132.143  
130.267  
129.632  
129.368  
129.003  
128.813  
128.536  
128.248  
128.056  
127.978  
127.108  
126.974  
126.565  
125.790  
125.464  
124.474  
122.670  
120.800

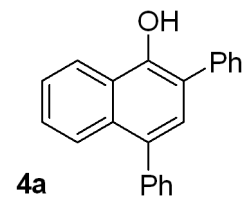

JRT-9-155A 300 MHz, CDCl<sub>3</sub>

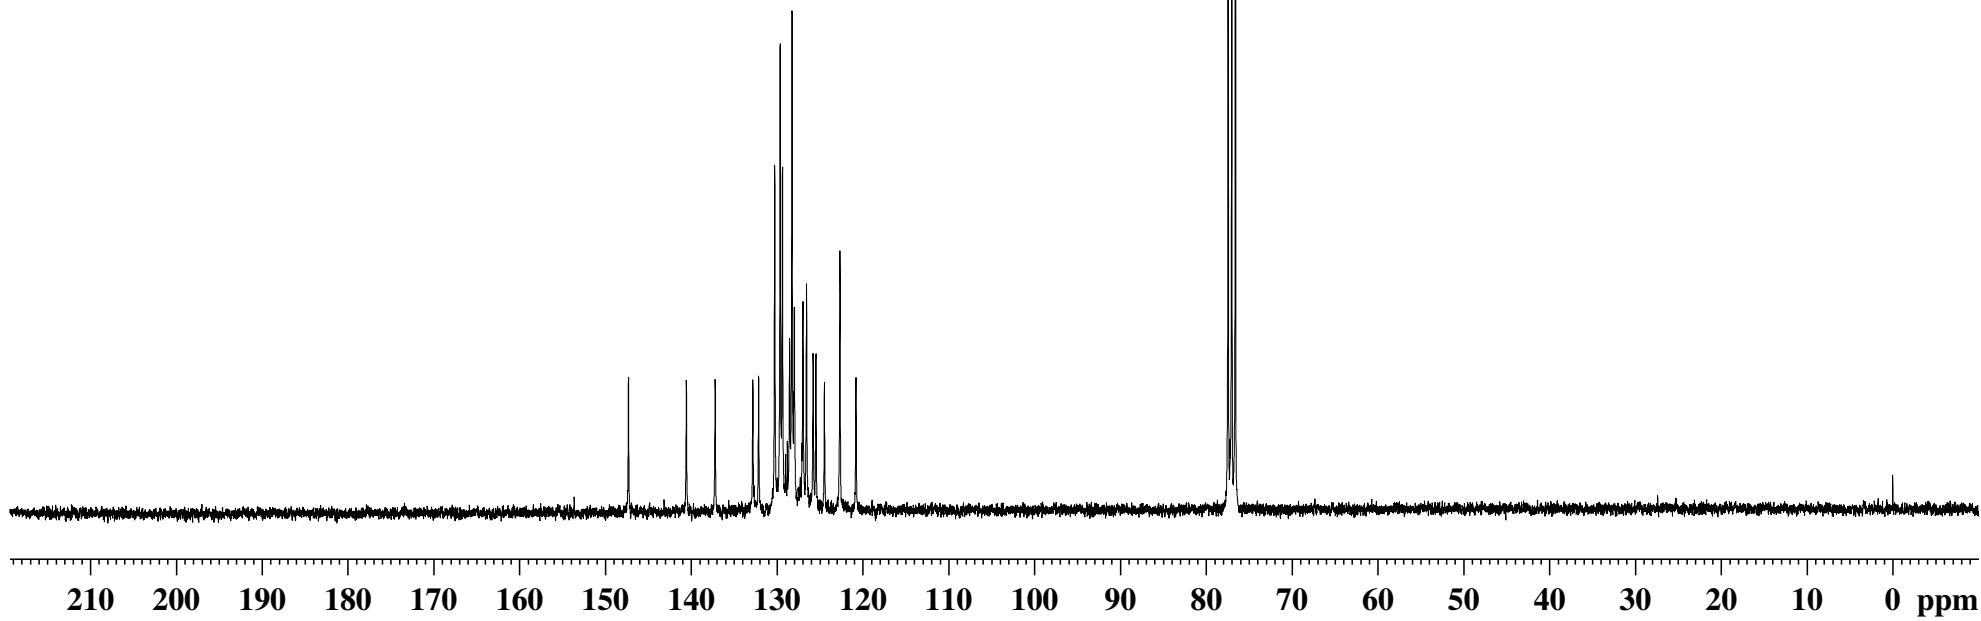

8.487  
8.467  
8.133  
7.910  
7.890  
7.653  
7.634  
7.561  
7.544  
7.524  
7.462  
7.443  
7.399  
7.380  
7.346  
7.339  
7.327  
7.296  
7.278

JRT-10-089 (N400)

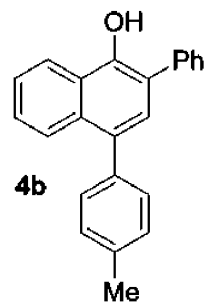

2.400

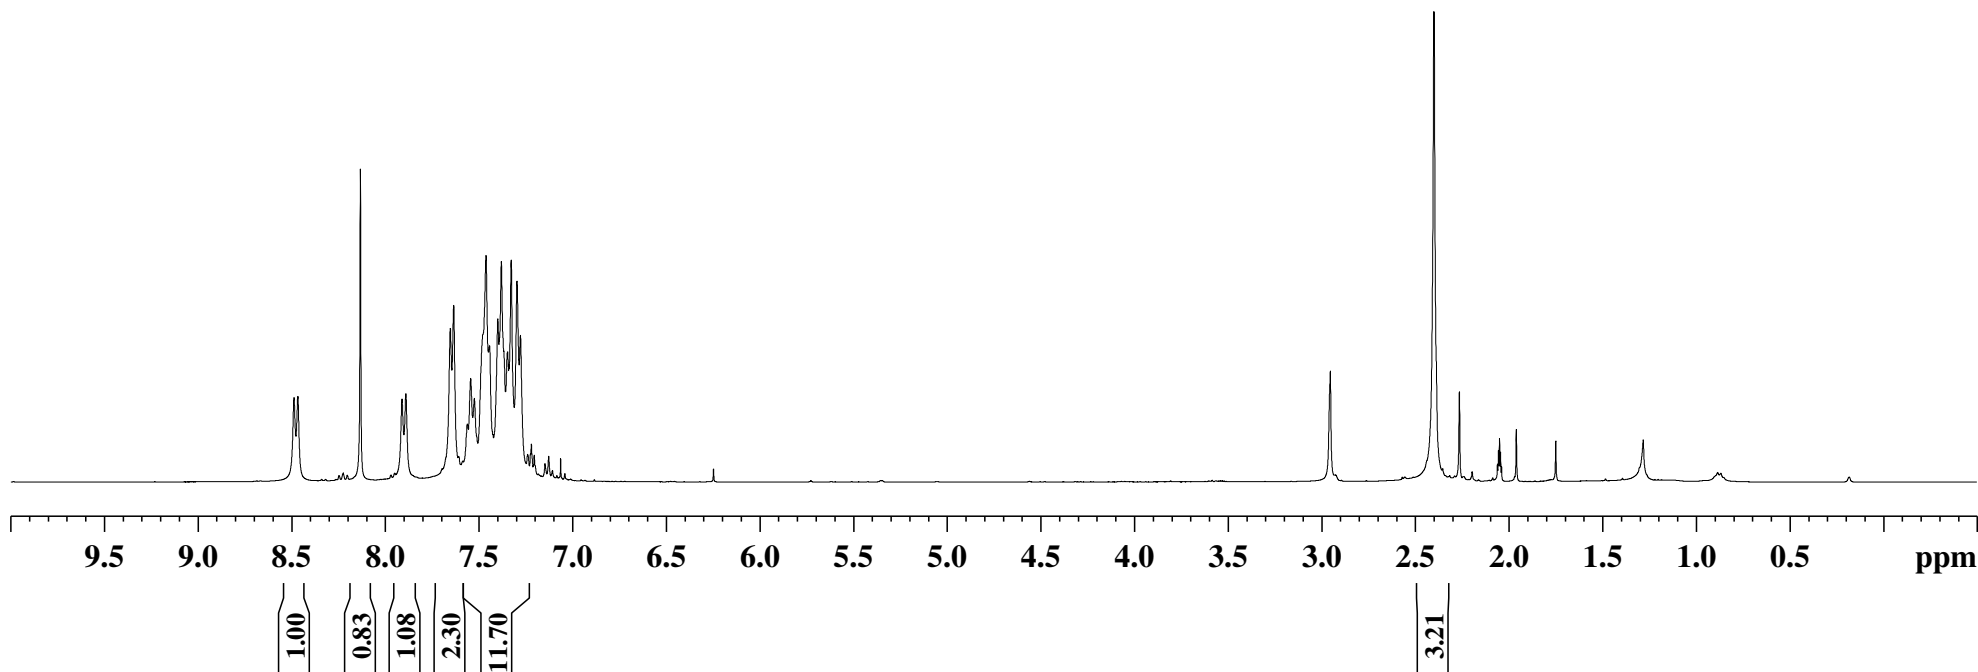

149.053  
139.341  
138.573  
137.269  
133.262  
132.974  
130.846  
130.571  
130.222  
130.153  
130.022  
129.897  
129.856  
129.804  
129.536  
127.980  
127.049  
126.837  
126.449  
126.024  
123.571  
123.106

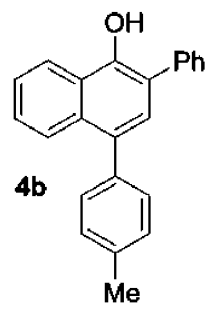

21.207

JRT-10-089 (N400 NMR)

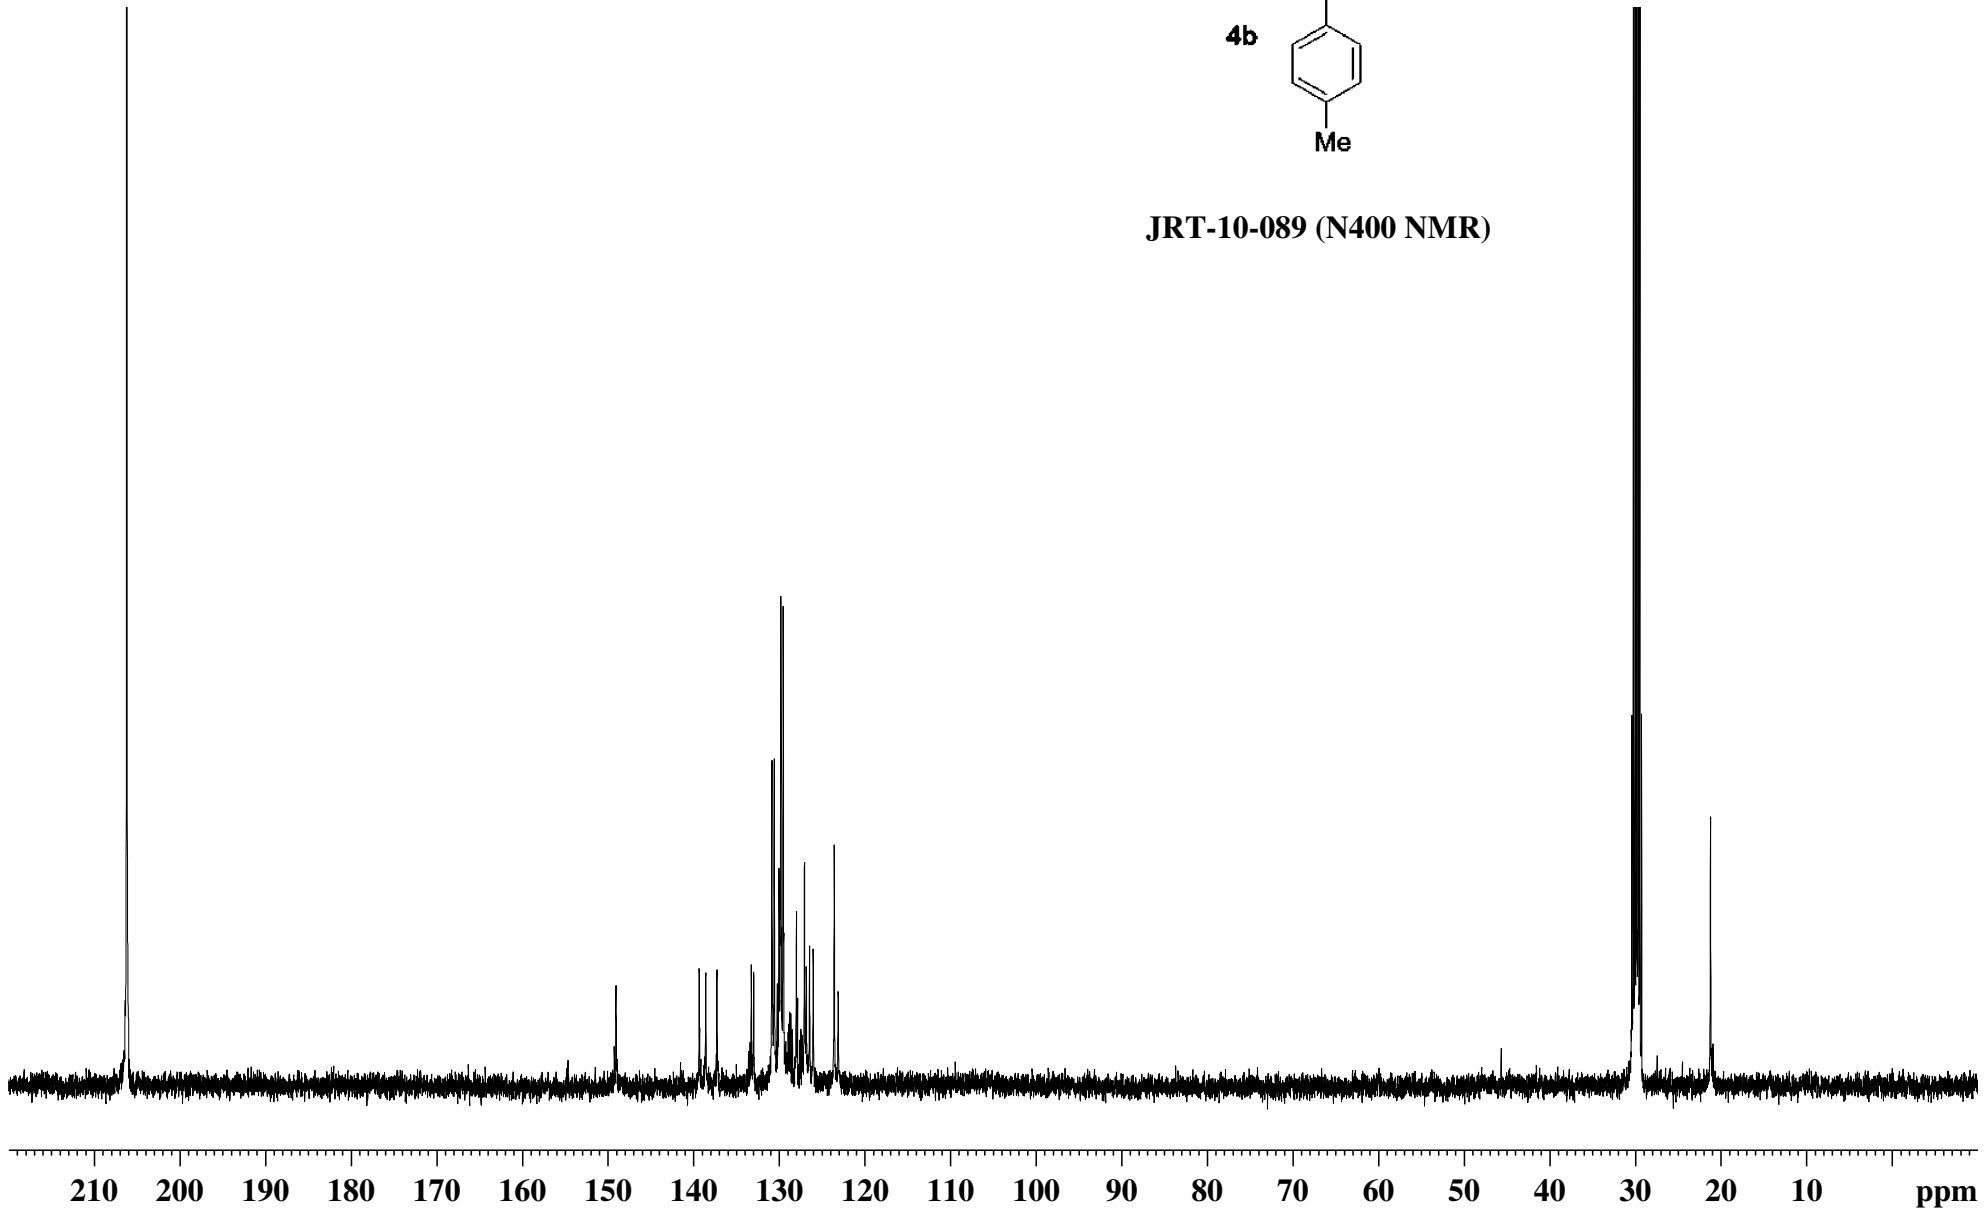

8.381  
8.355  
7.918  
7.891  
7.553  
7.519  
7.496  
7.434  
7.408  
7.310  
7.224  
7.015  
6.989

5.878

3.863

JRT-9-181 F6-8 300 MHz, CDCl<sub>3</sub>

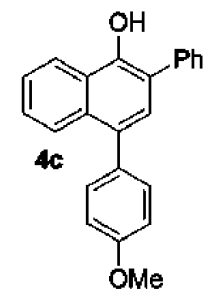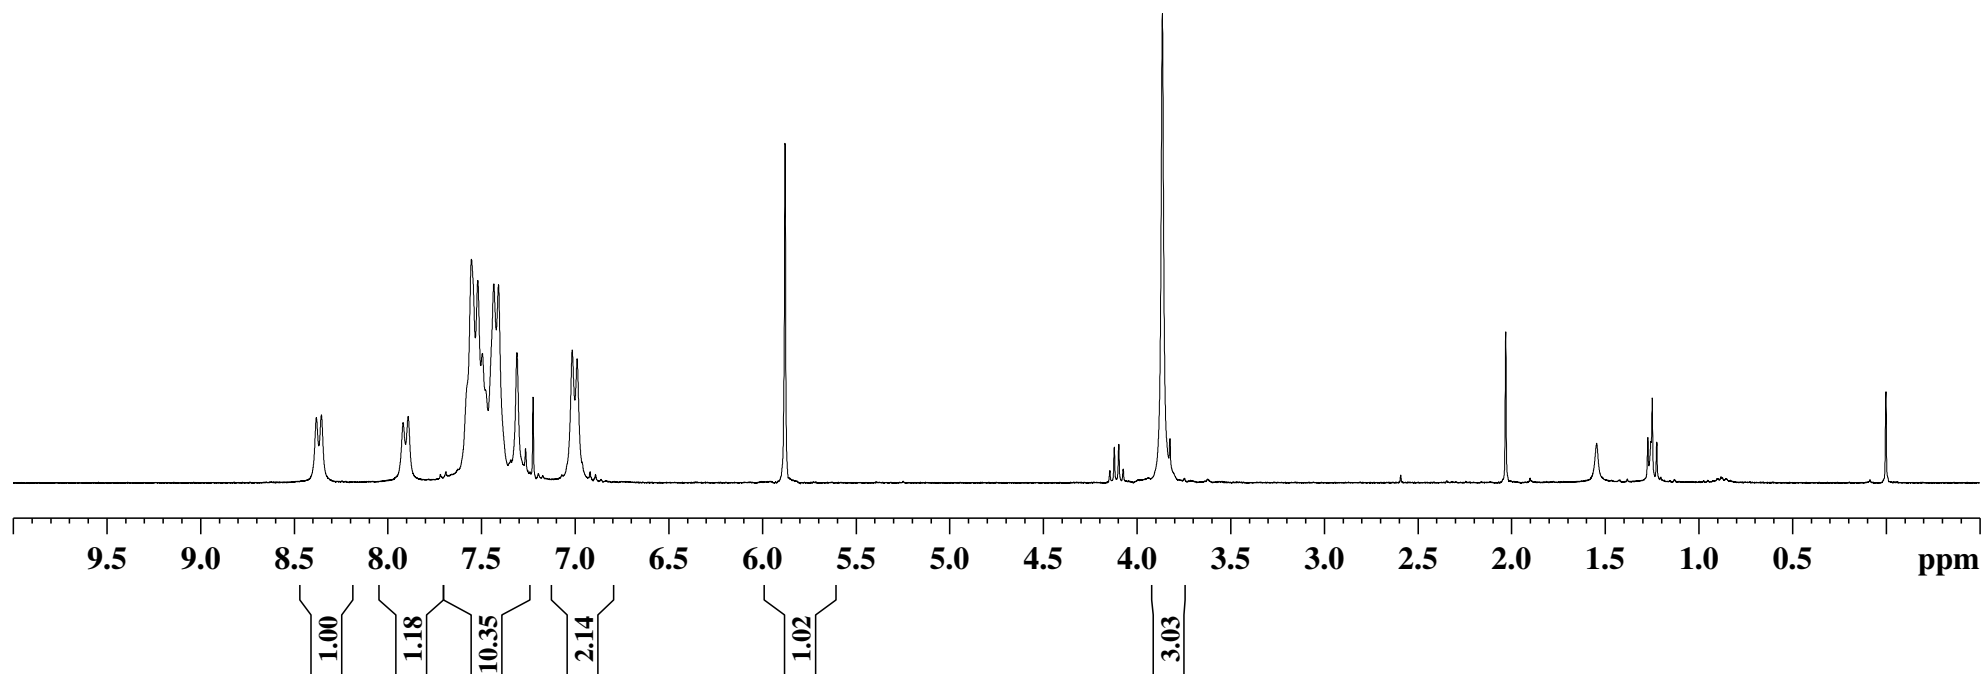

158.731  
147.057  
137.267  
132.915  
132.420  
132.328  
131.230  
130.193  
129.987  
129.573  
129.341  
128.437  
128.061  
127.900  
126.445  
125.822  
125.379  
124.494  
122.634  
120.803  
114.165  
113.695

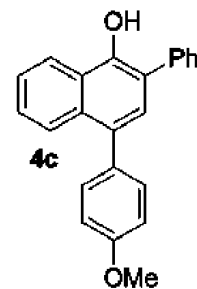

55.318

JRT-9-181 F6-8 300 MHz, CDCl<sub>3</sub>

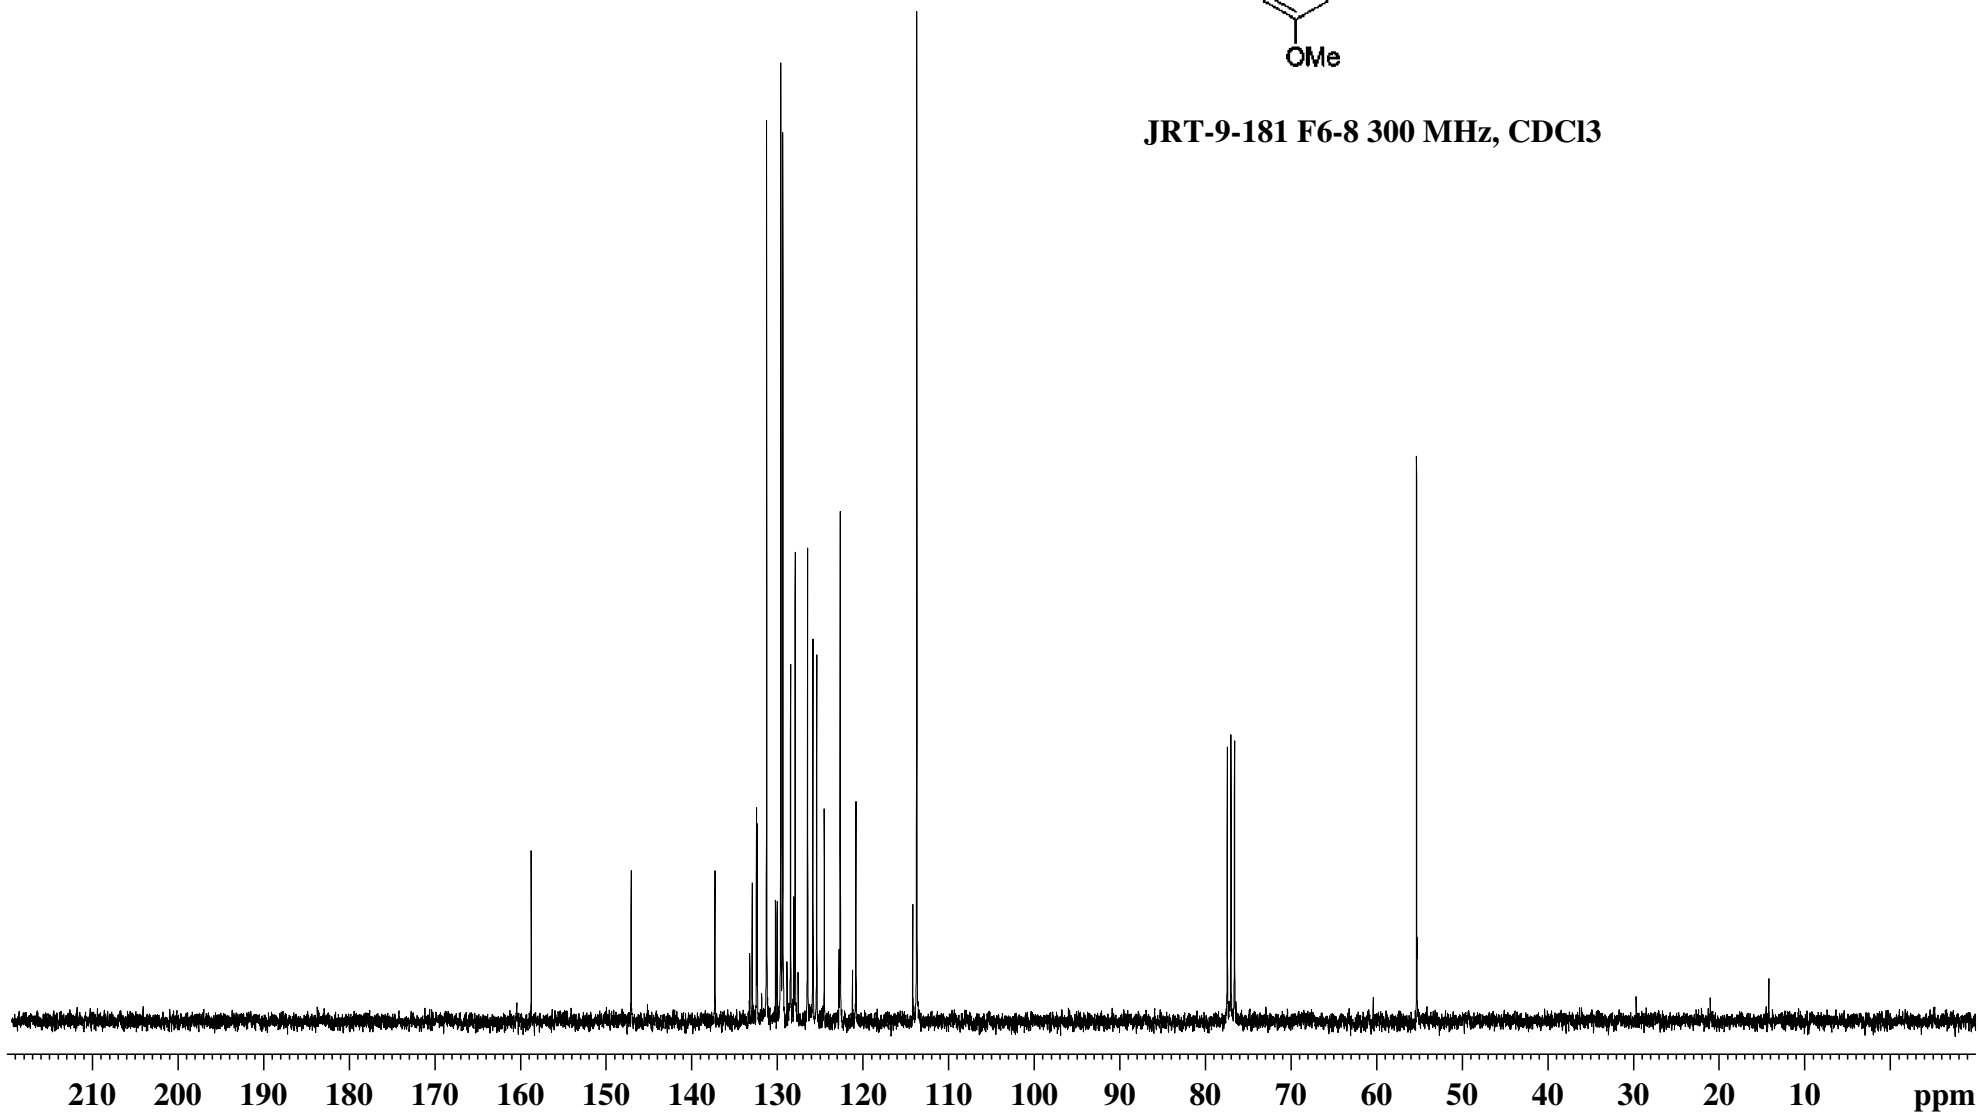



8.488  
8.468  
8.253  
7.840  
7.819  
7.635  
7.617  
7.572  
7.554  
7.535  
7.492  
7.457  
7.438  
7.369  
7.350  
7.326  
7.237  
7.218

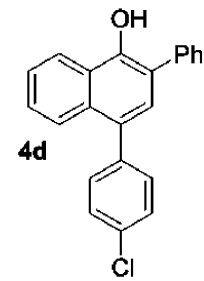

**JRT-10-096-1 N400**

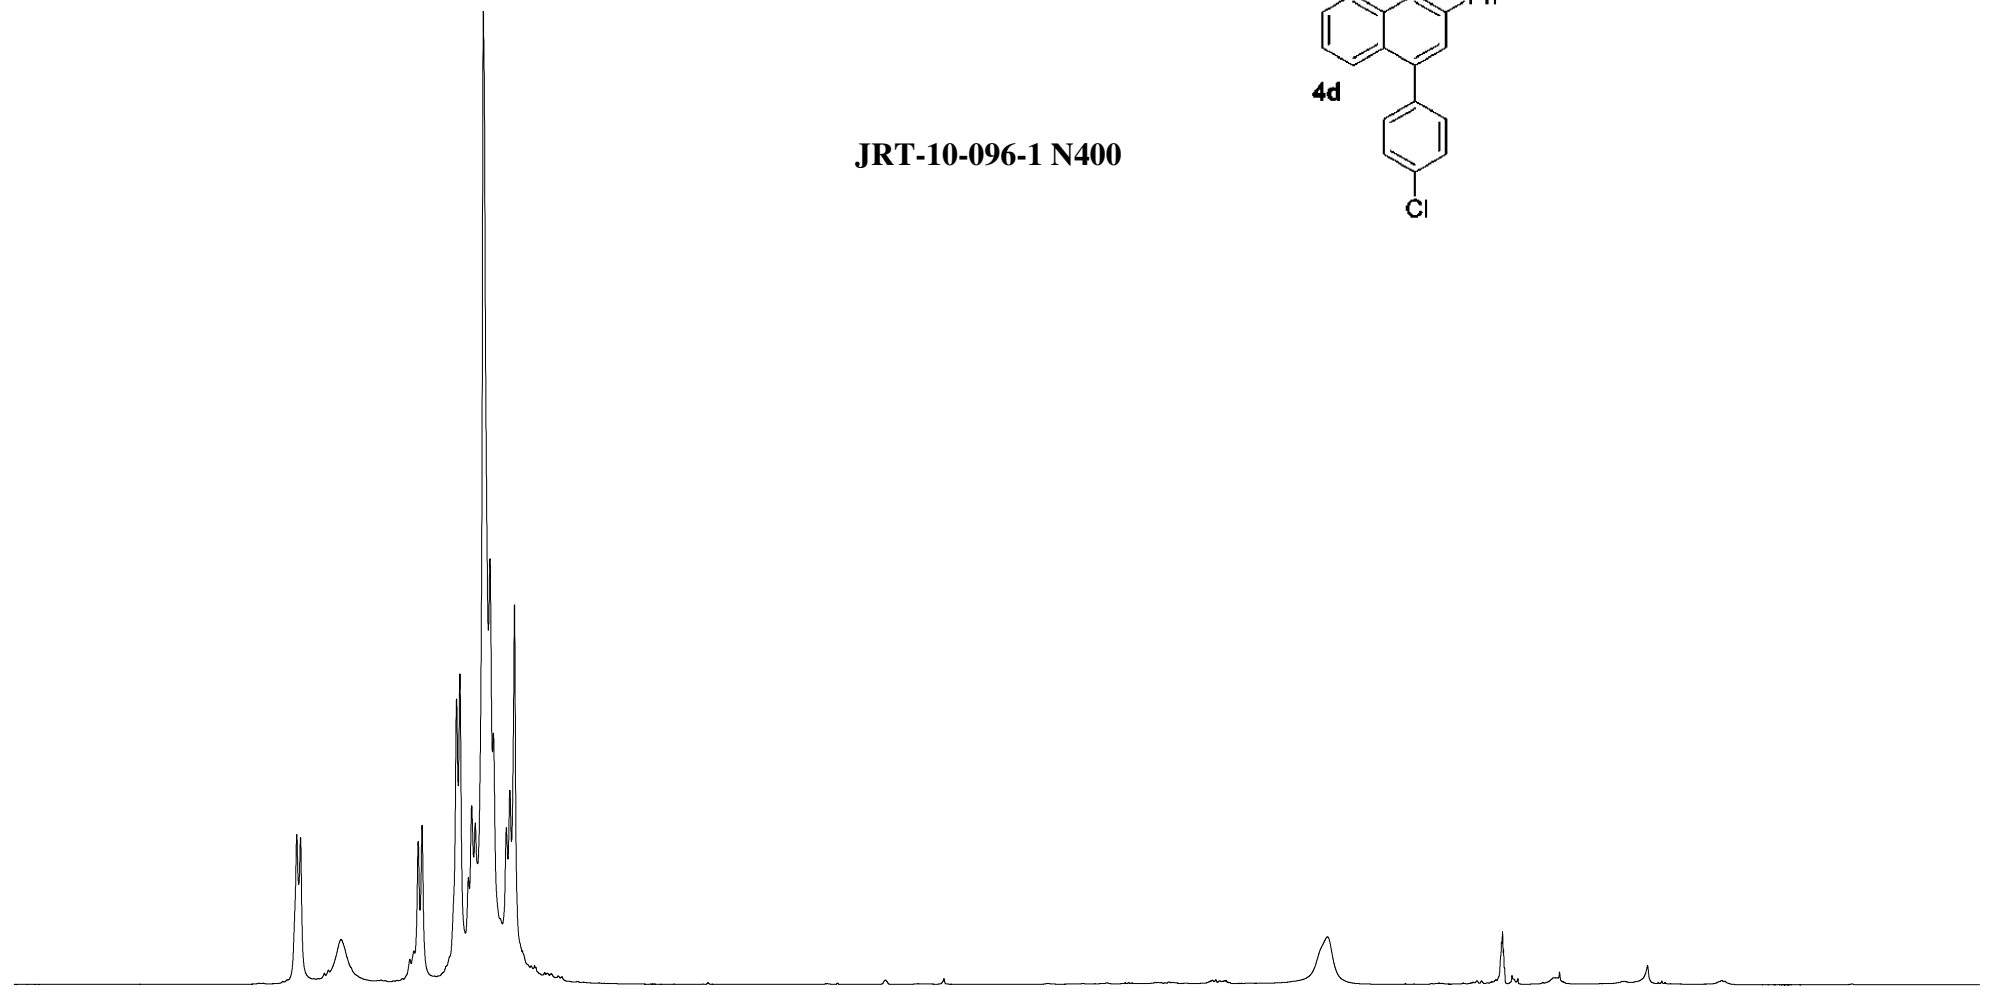

1.00  
0.71  
1.04  
2.05  
8.27  
2.72

149.536  
140.237  
139.096  
133.324  
132.633  
132.569  
131.731  
130.562  
130.274  
129.537  
129.230  
128.053  
127.381  
126.806  
126.194  
126.019  
123.674  
123.100

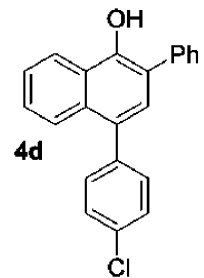

JRT-10-096-1 N400

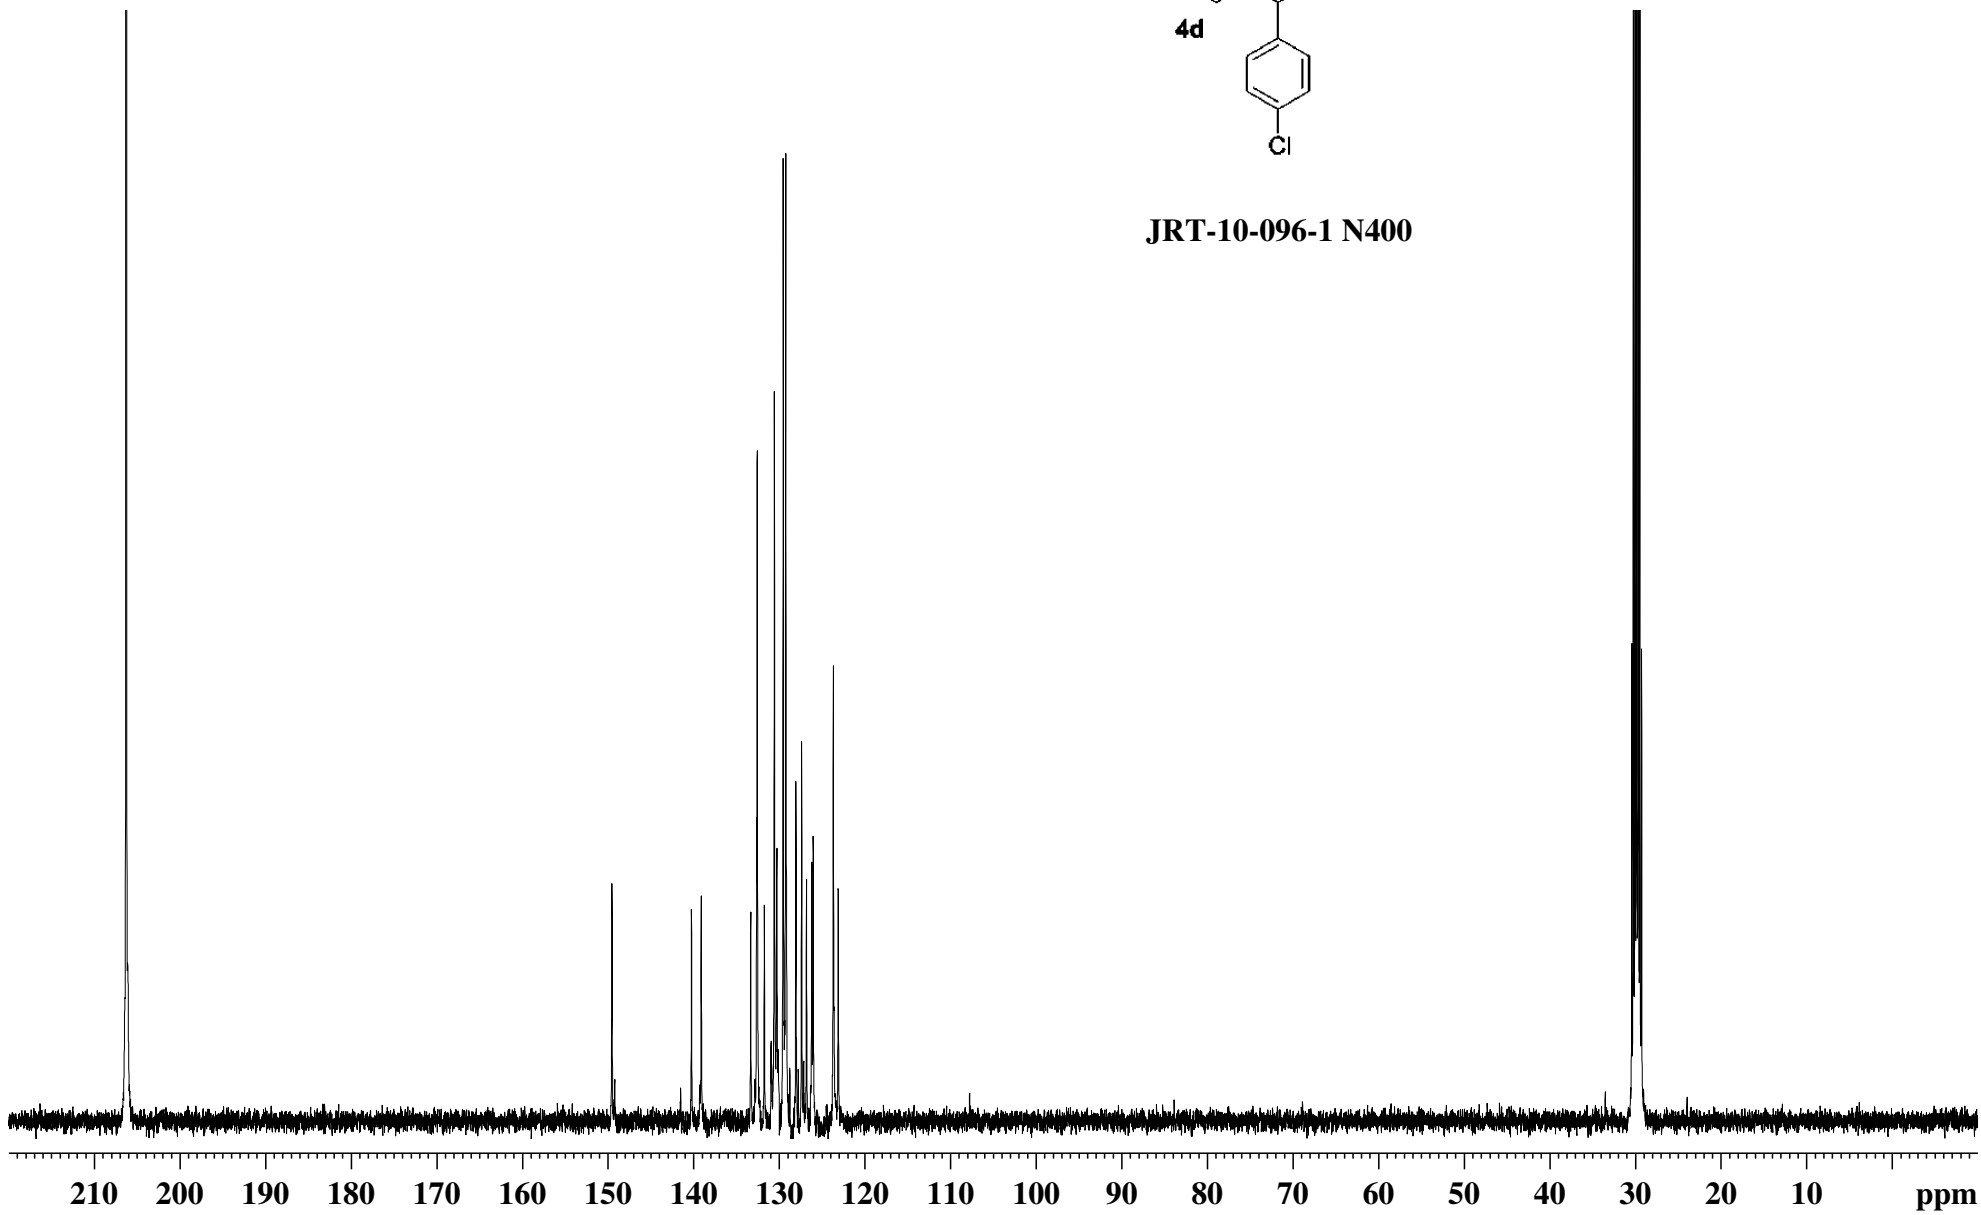

8.471  
8.453  
8.086  
7.879  
7.859  
7.531  
7.501  
7.416  
7.406  
7.352  
7.322  
7.285  
7.268

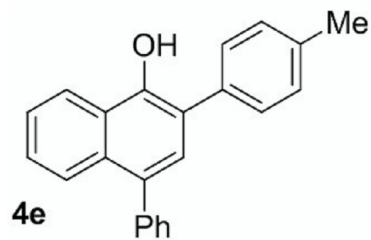

2.374

**JRT-10-088 F1 1H-NMR 400 MHz in Ac**

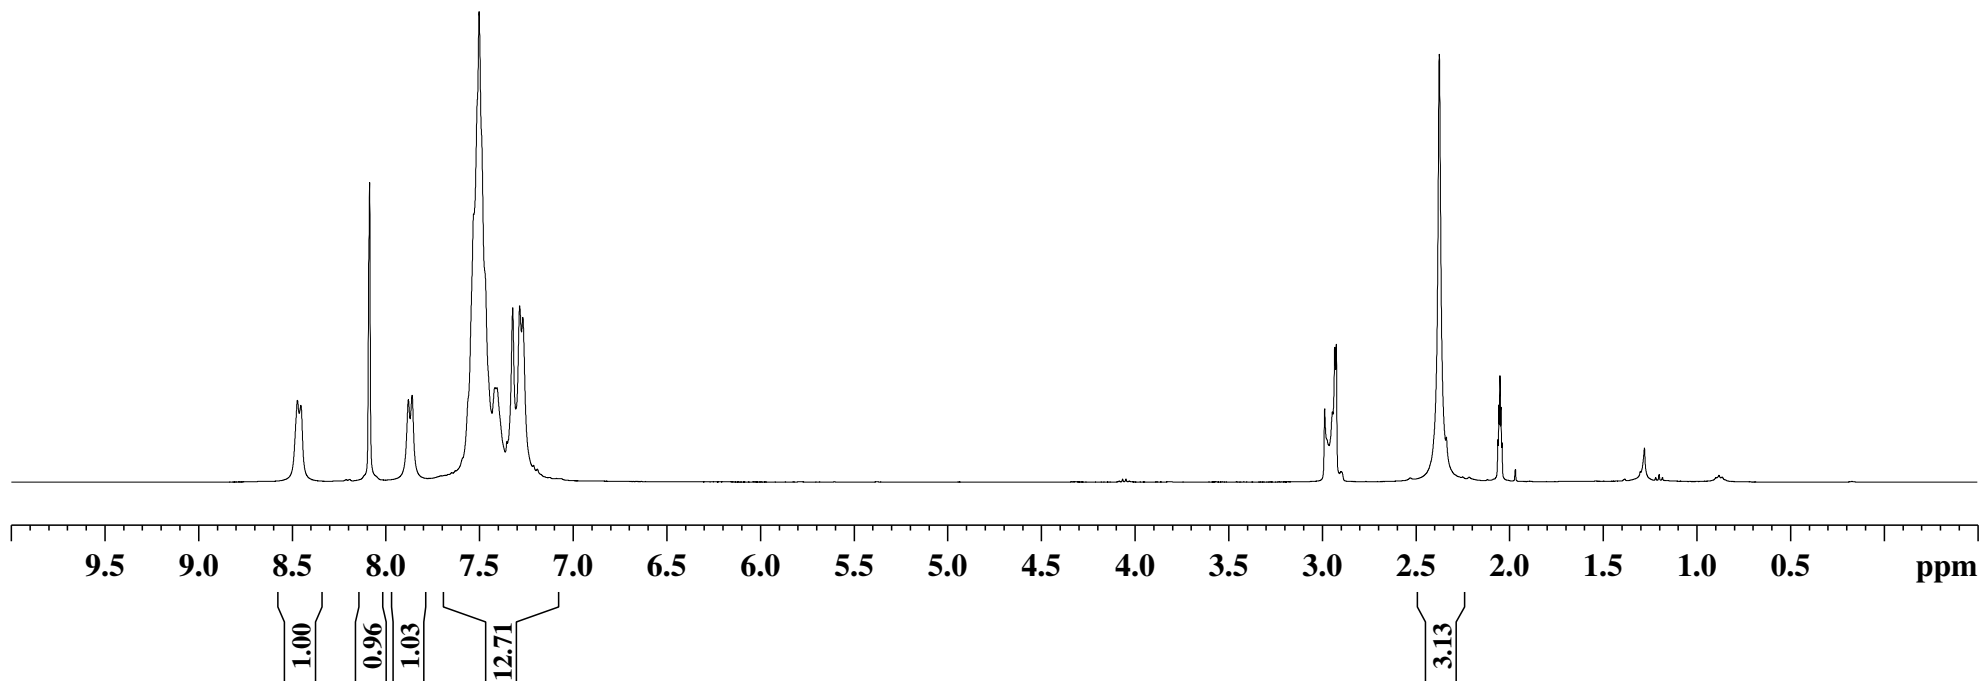

149.193  
141.583  
137.544  
136.232  
133.161  
132.749  
130.971  
130.453  
130.235  
129.175  
127.782  
127.060  
126.772  
126.311  
126.037  
123.584  
122.984

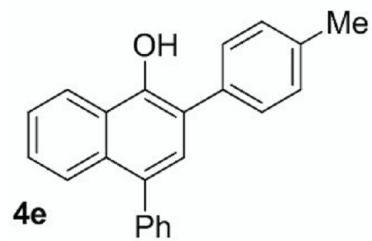

JRT-10-088 F1 1H-NMR 400 MHz in Acetone

21.195

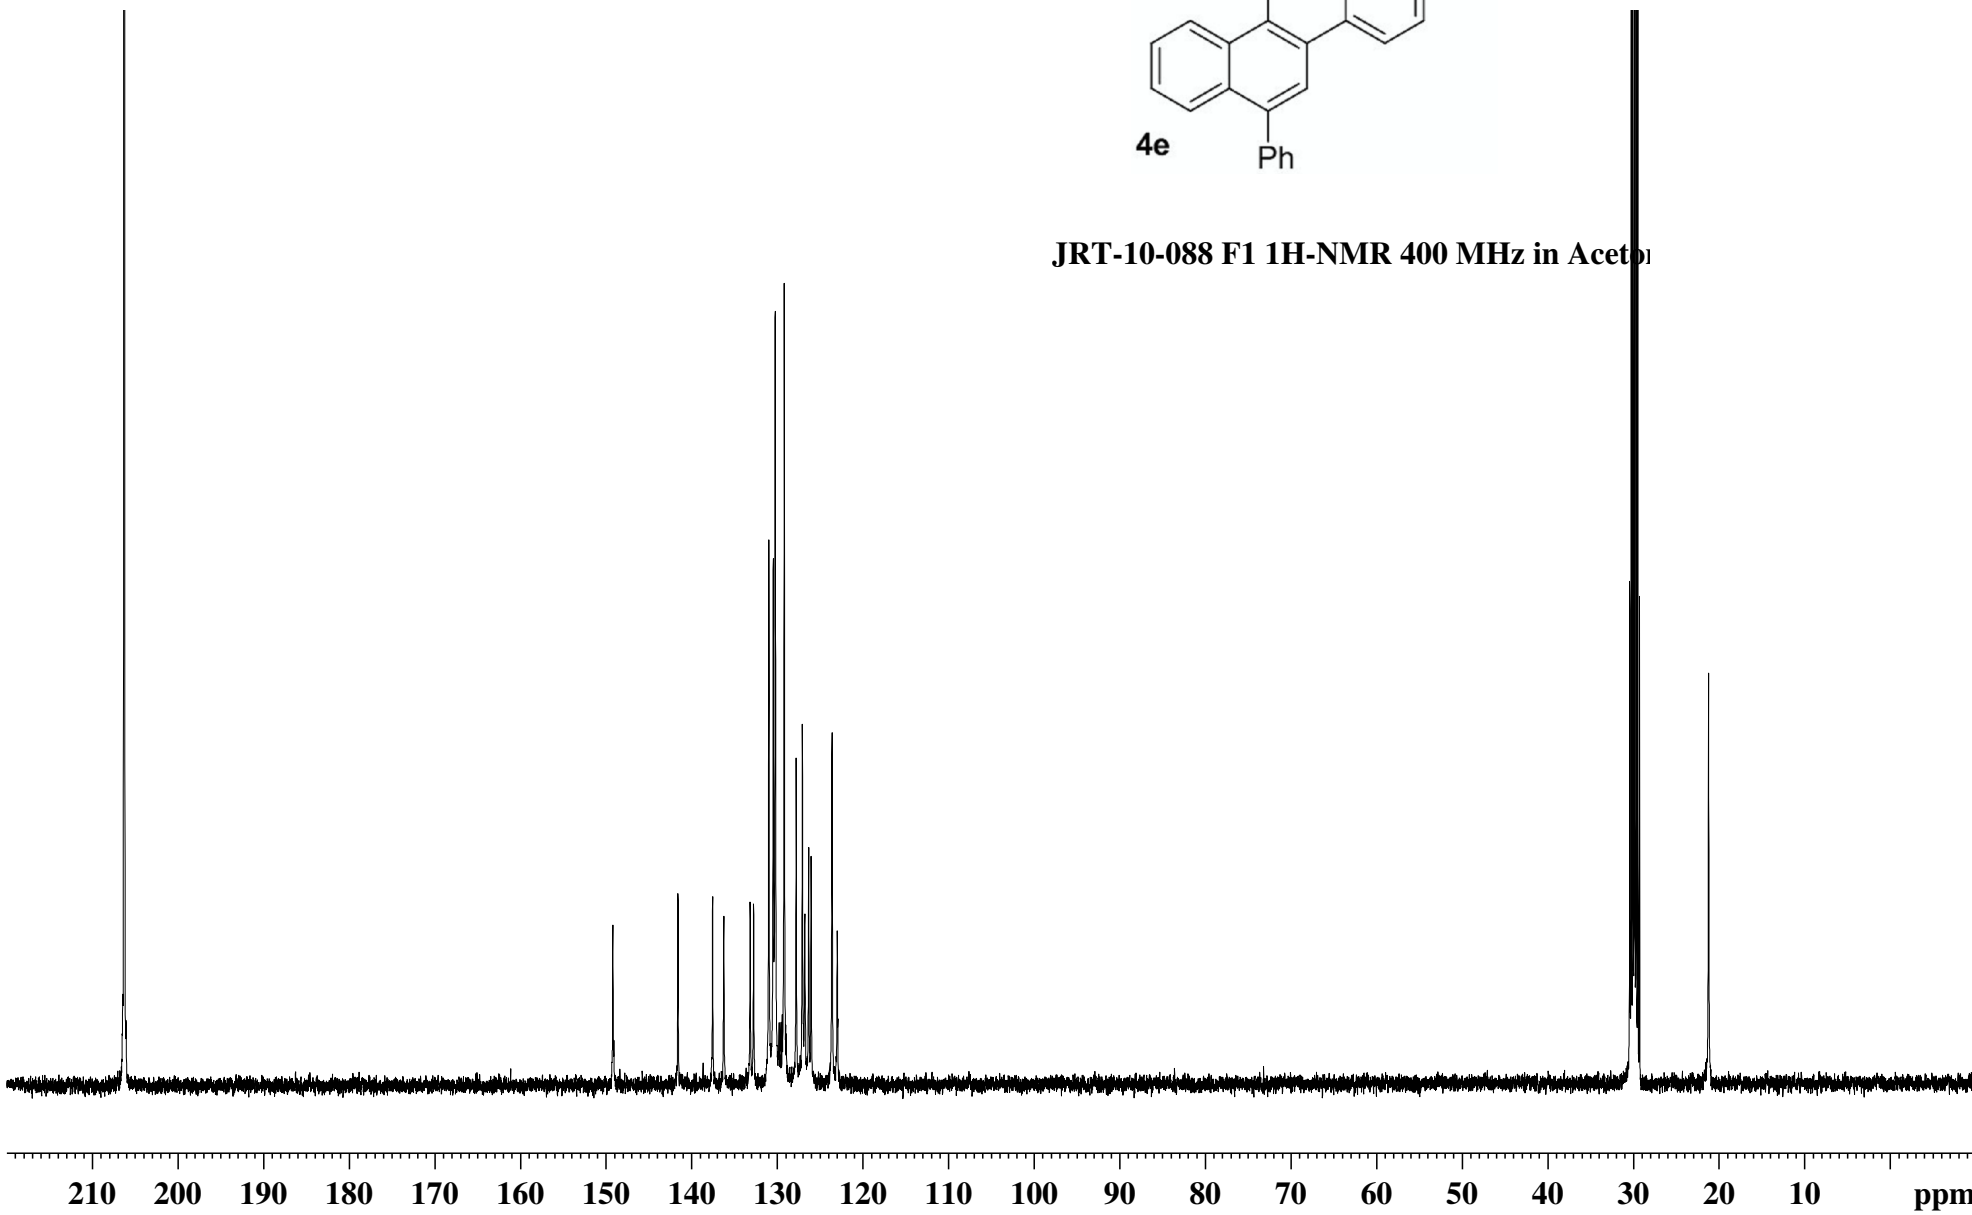

8.460  
8.440  
8.109  
7.875  
7.855  
7.566  
7.549  
7.528  
7.514  
7.508  
7.500  
7.482  
7.466  
7.438  
7.431  
7.422  
7.379  
7.360  
7.341  
7.321  
7.198  
7.180

2.398

JRT-10-093 N400

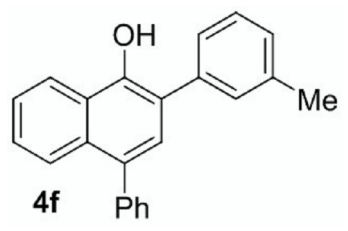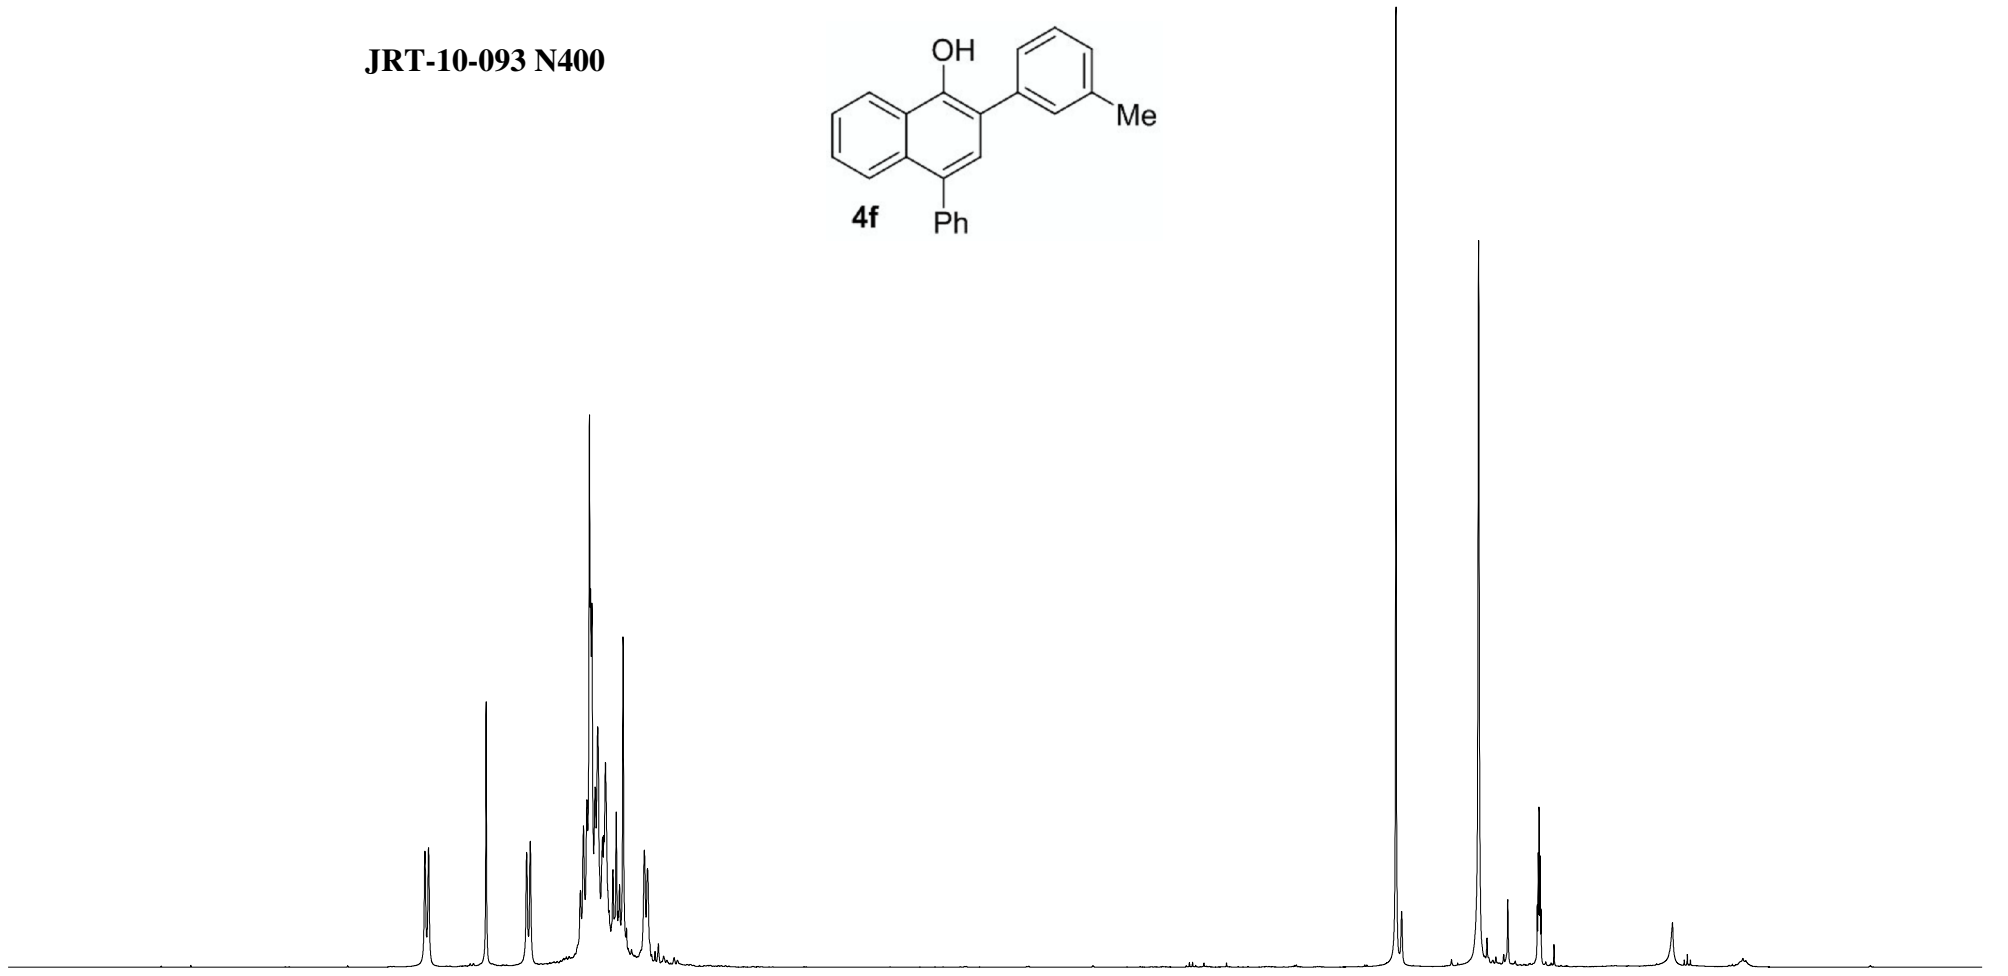

10.5 10.0 9.5 9.0 8.5 8.0 7.5 7.0 6.5 6.0 5.5 5.0 4.5 4.0 3.5 3.0 2.5 2.0 1.5 1.0 0.5 ppm

1.00 0.69 1.04 9.31 2.61 1.47 3.00

149.172  
141.566  
139.113  
139.055  
133.114  
132.792  
131.186  
130.957  
130.102  
129.526  
129.313  
128.734  
127.777  
127.588  
127.101  
126.733  
126.278  
126.020  
123.608  
123.047

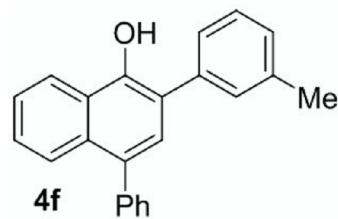

JRT-10-093 N400

21.468

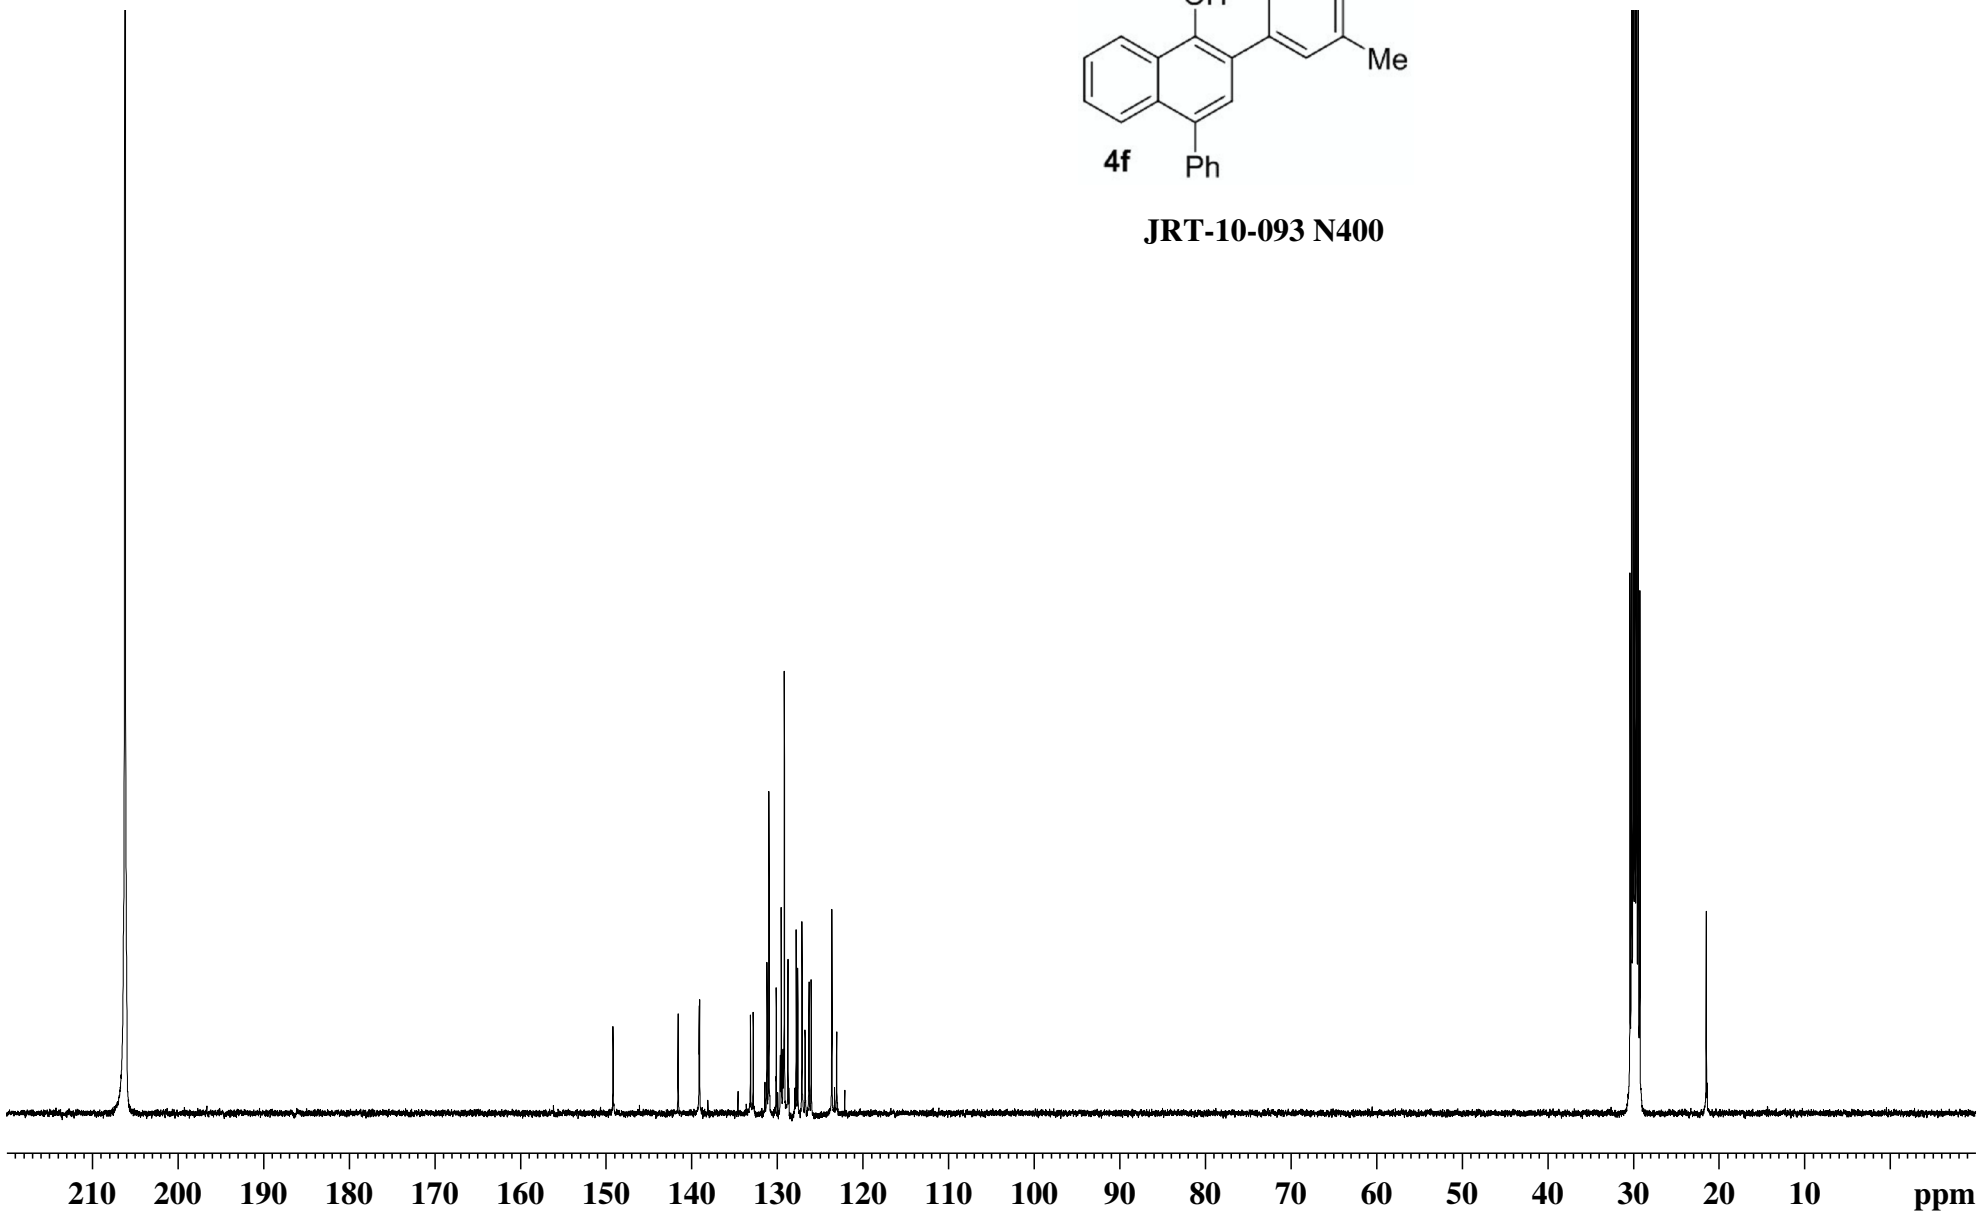

8.470  
8.116  
7.876  
7.549  
7.507  
7.491  
7.344  
7.307  
7.289

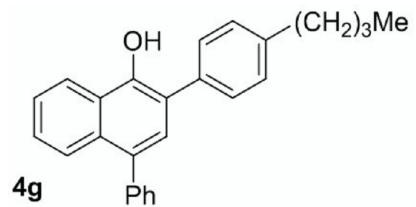

2.659  
2.642

1.662  
1.645  
1.334  
1.325  
0.907  
0.890

JRT-10-098 N400

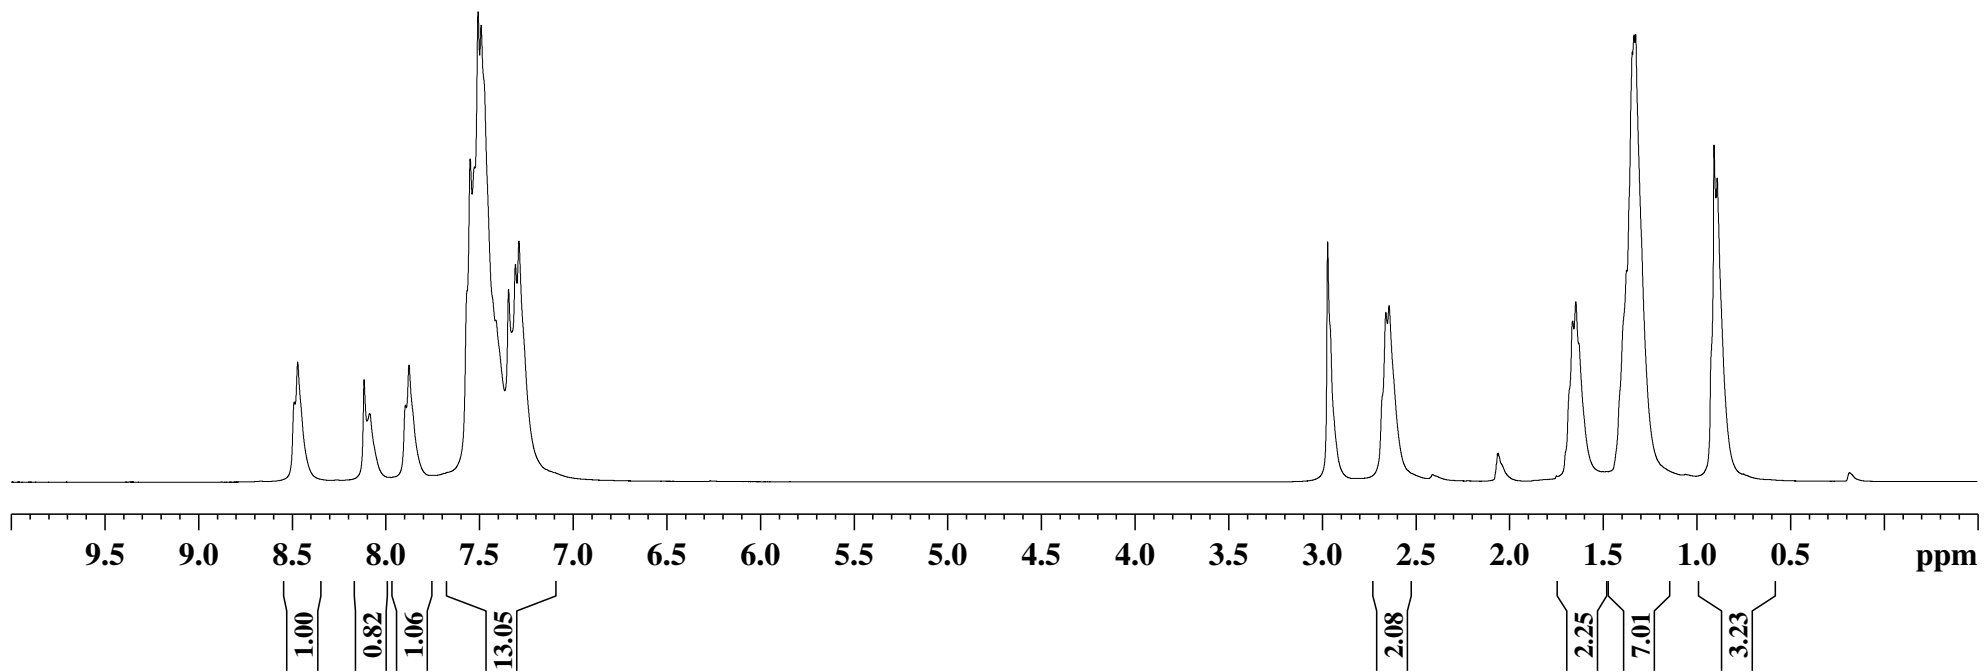

149.156  
142.585  
141.572  
136.448  
133.157  
132.734  
130.954  
130.405  
130.198  
129.581  
129.137  
127.743  
127.015  
126.776  
126.297  
125.988  
123.585  
122.986

36.242  
32.441  
32.276  
30.413  
30.220  
30.028  
29.835  
29.742  
29.643  
29.451  
29.257  
23.279  
14.394

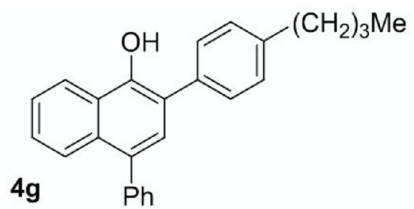

JRT-10-098 N400

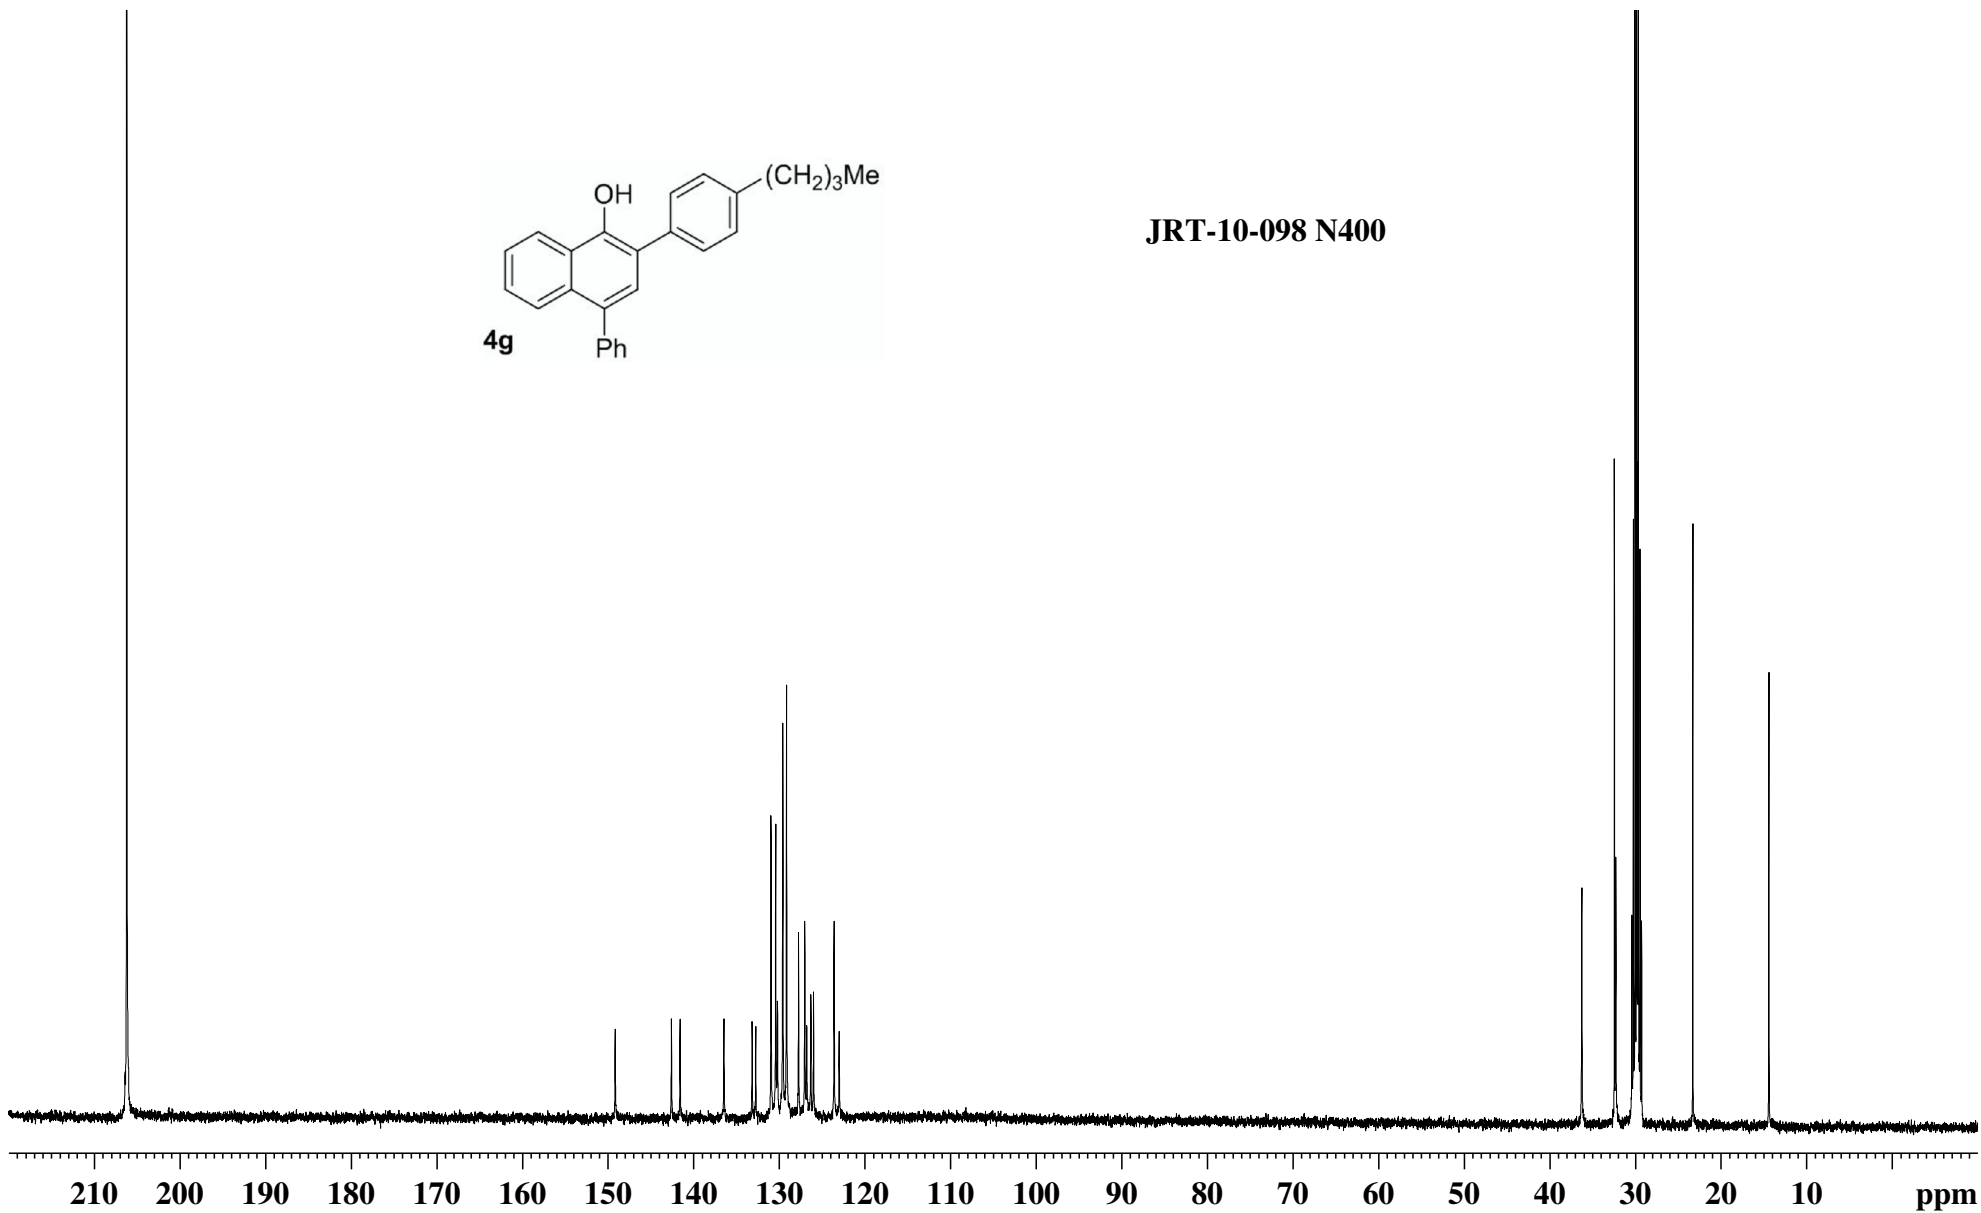



7.901  
7.881  
7.578  
7.575  
7.571  
7.561  
7.557  
7.552  
7.544  
7.541  
7.533  
7.524  
7.505  
7.500  
7.489  
7.469  
7.450  
7.442  
7.429  
7.422  
7.416  
7.411  
7.407  
7.398  
7.391  
7.302  
7.283  
7.273  
7.258  
7.234  
7.212

JRT-10-086 400 MHz

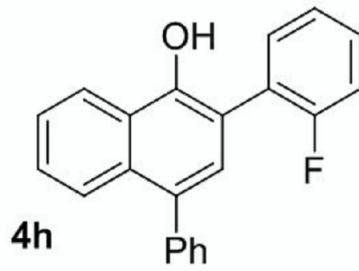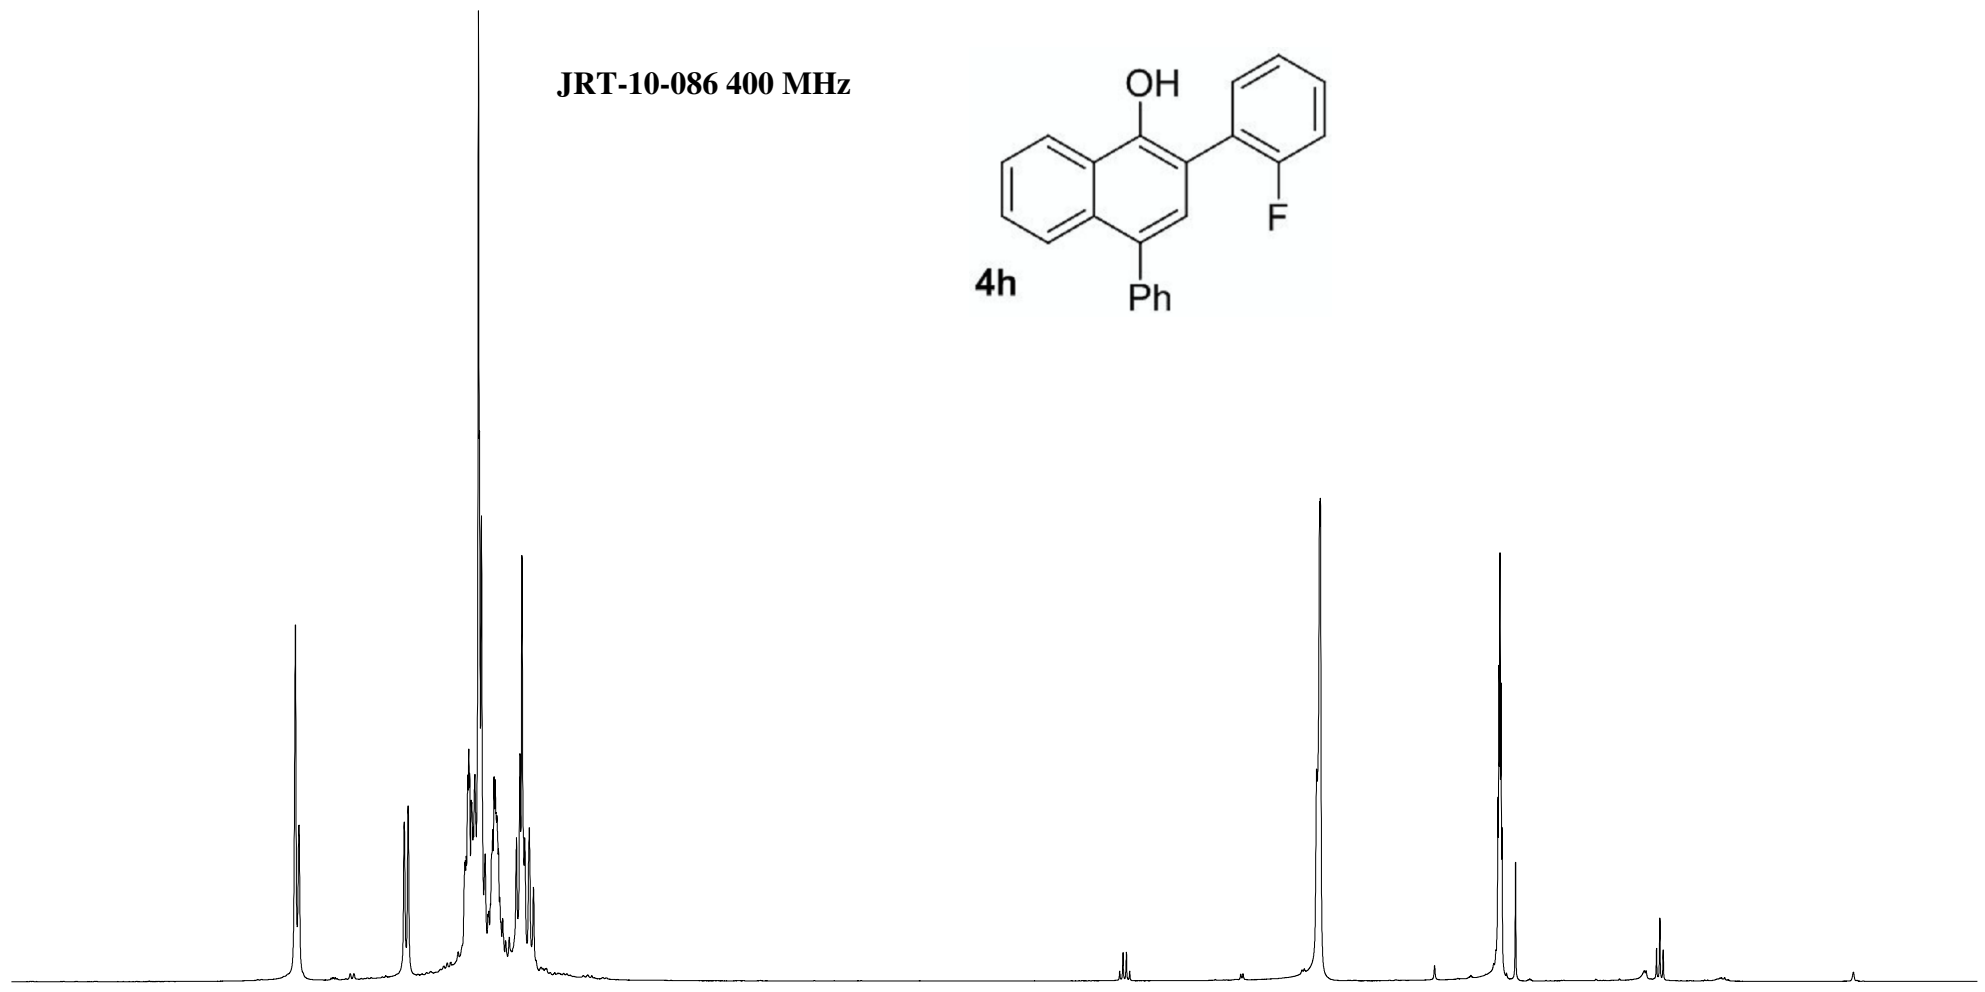

9.5 9.0 8.5 8.0 7.5 7.0 6.5 6.0 5.5 5.0 4.5 4.0 3.5 3.0 2.5 2.0 1.5 1.0 0.5 ppm

1.49  
1.00  
9.51  
3.45

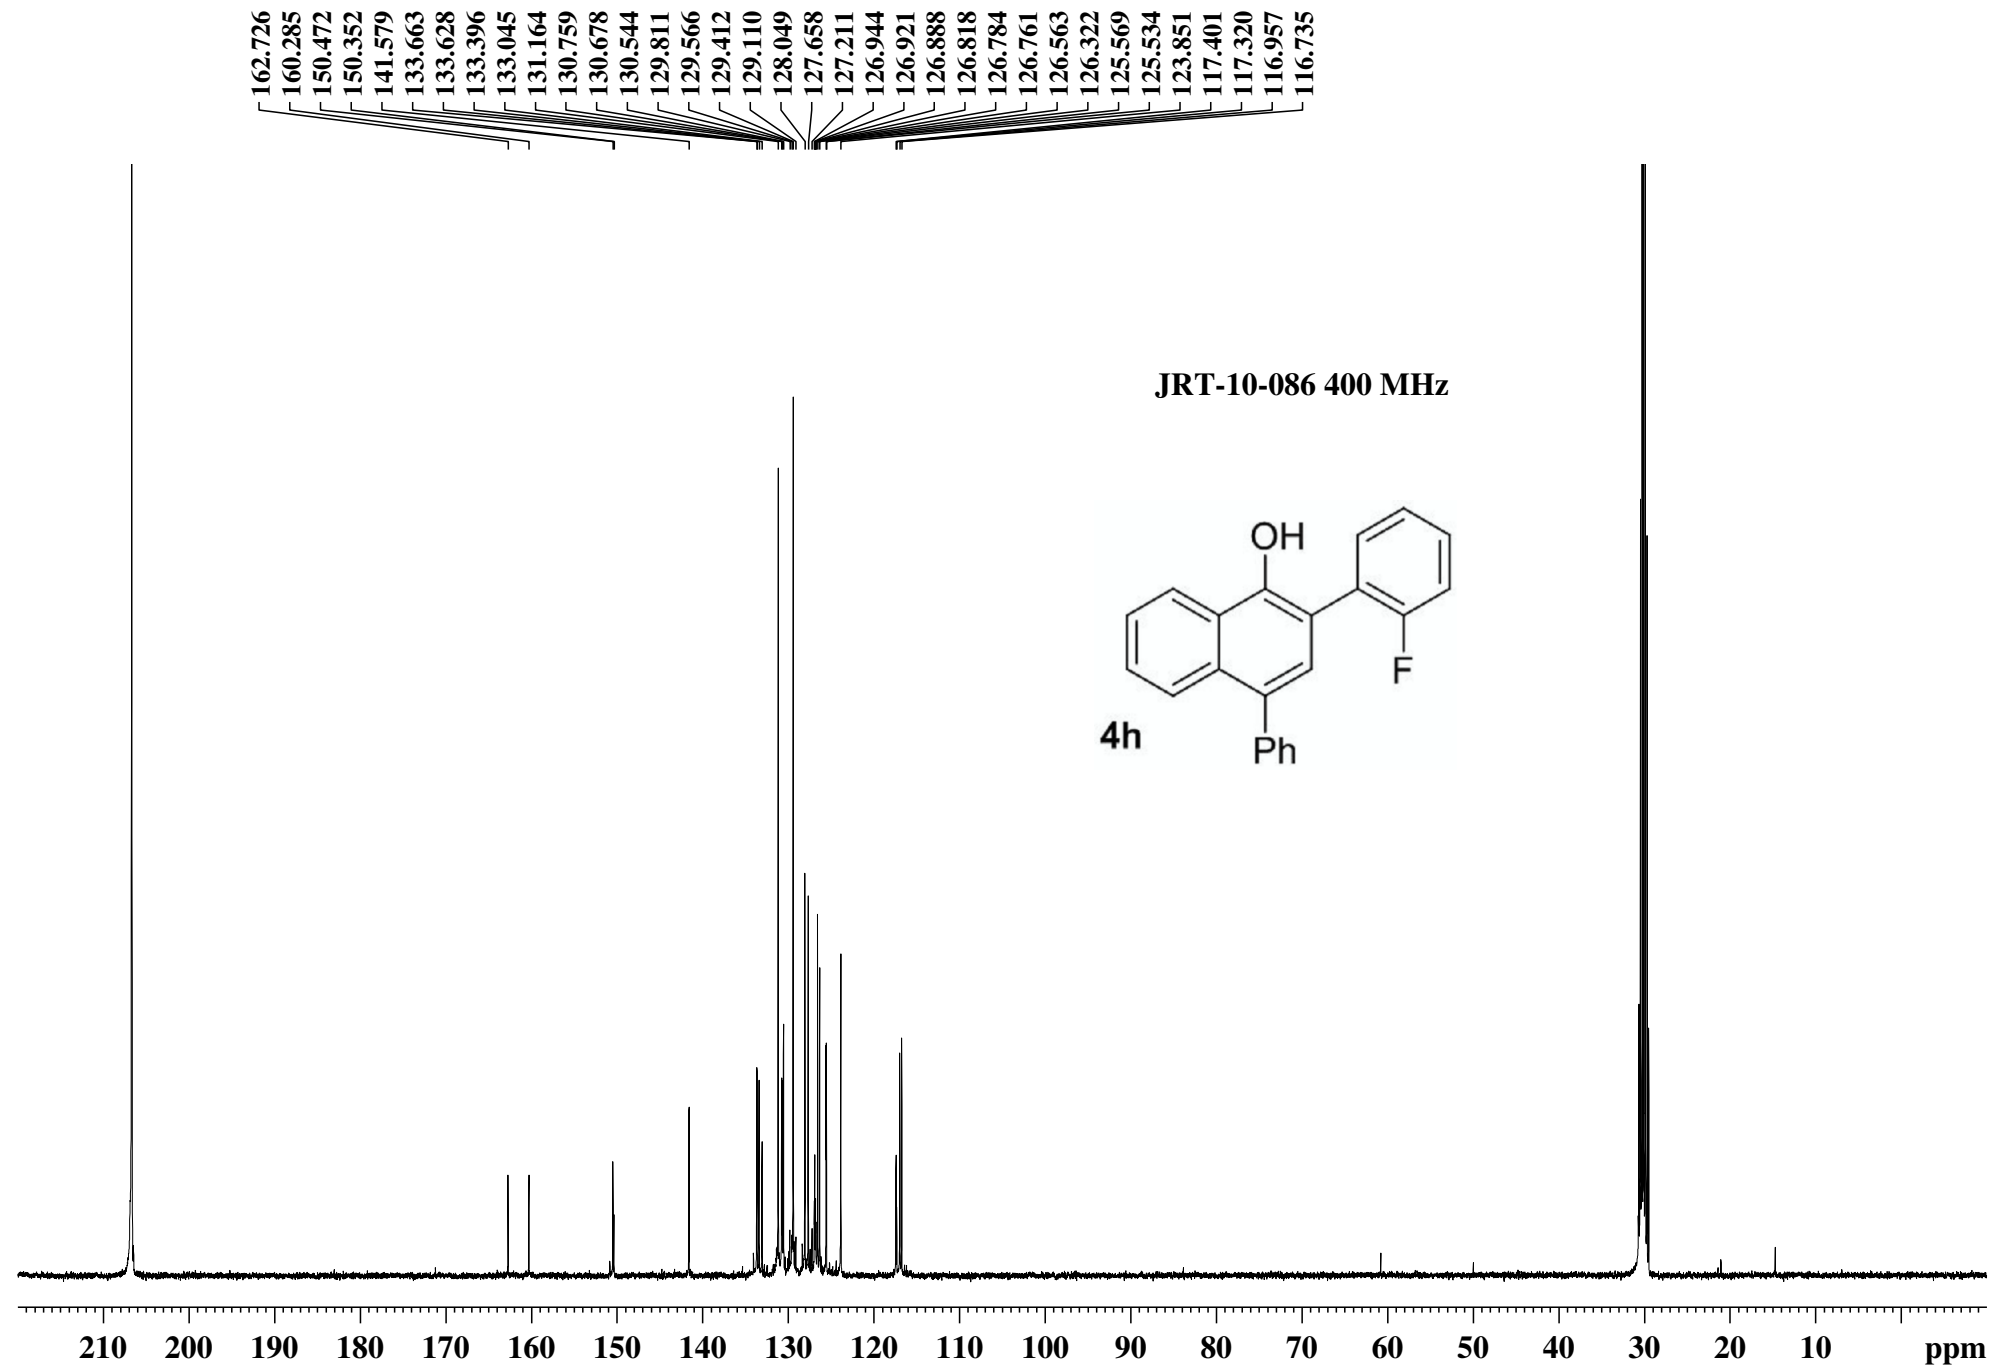

8.499  
8.478  
7.891  
7.871  
7.574  
7.557  
7.537  
7.498  
7.480  
7.431  
7.420  
7.404  
7.361  
7.117

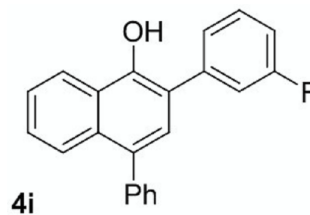

JRT-10-095 N400

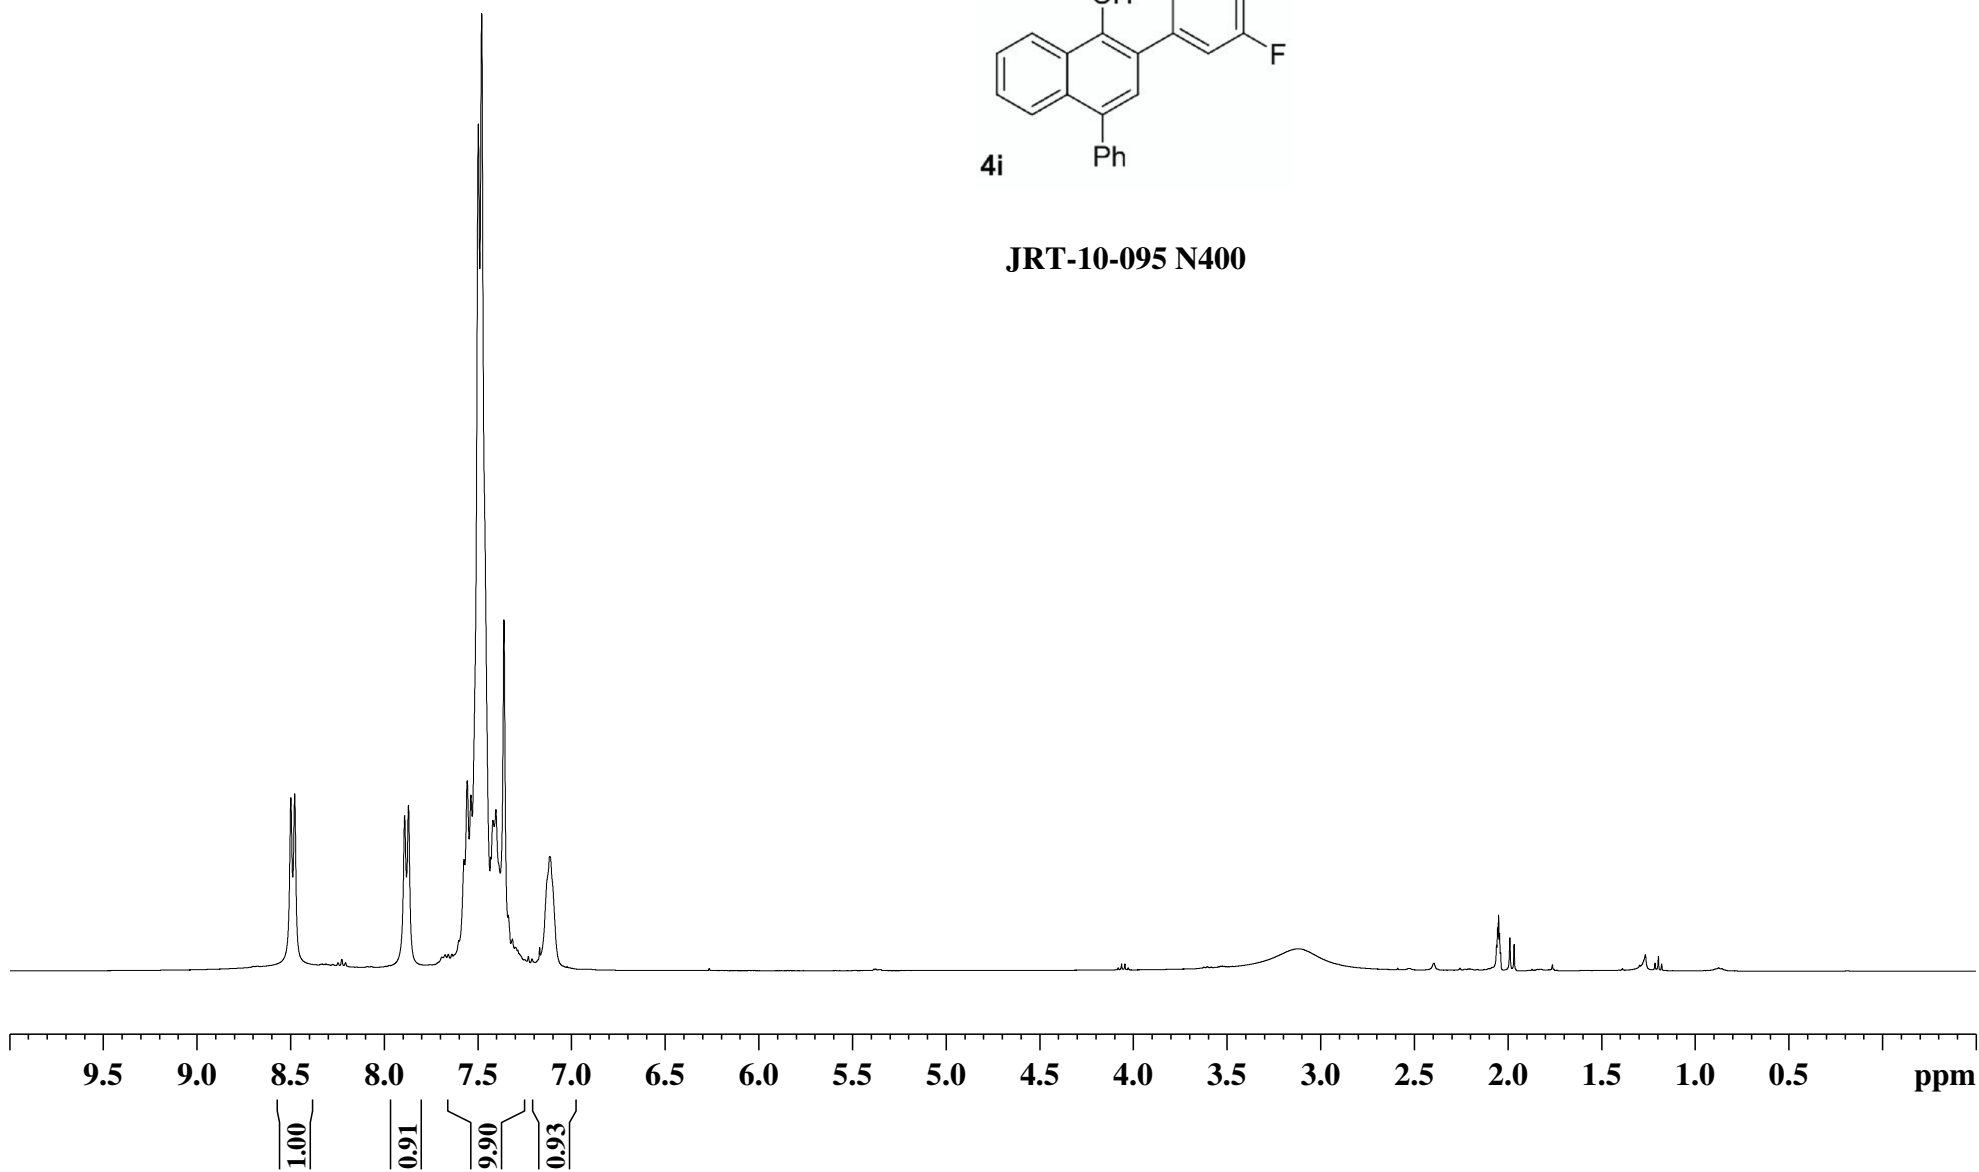

164.904  
162.480  
149.443  
141.874  
141.791  
141.359  
133.442  
133.052  
131.240  
131.158  
130.950  
129.729  
129.621  
129.569  
129.173  
127.845  
127.392  
127.060  
126.906  
126.563  
126.404  
126.222  
123.577  
122.045  
117.484  
117.268  
114.675  
114.463

JRT-10-095 N400

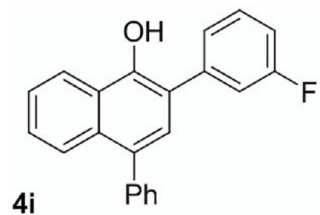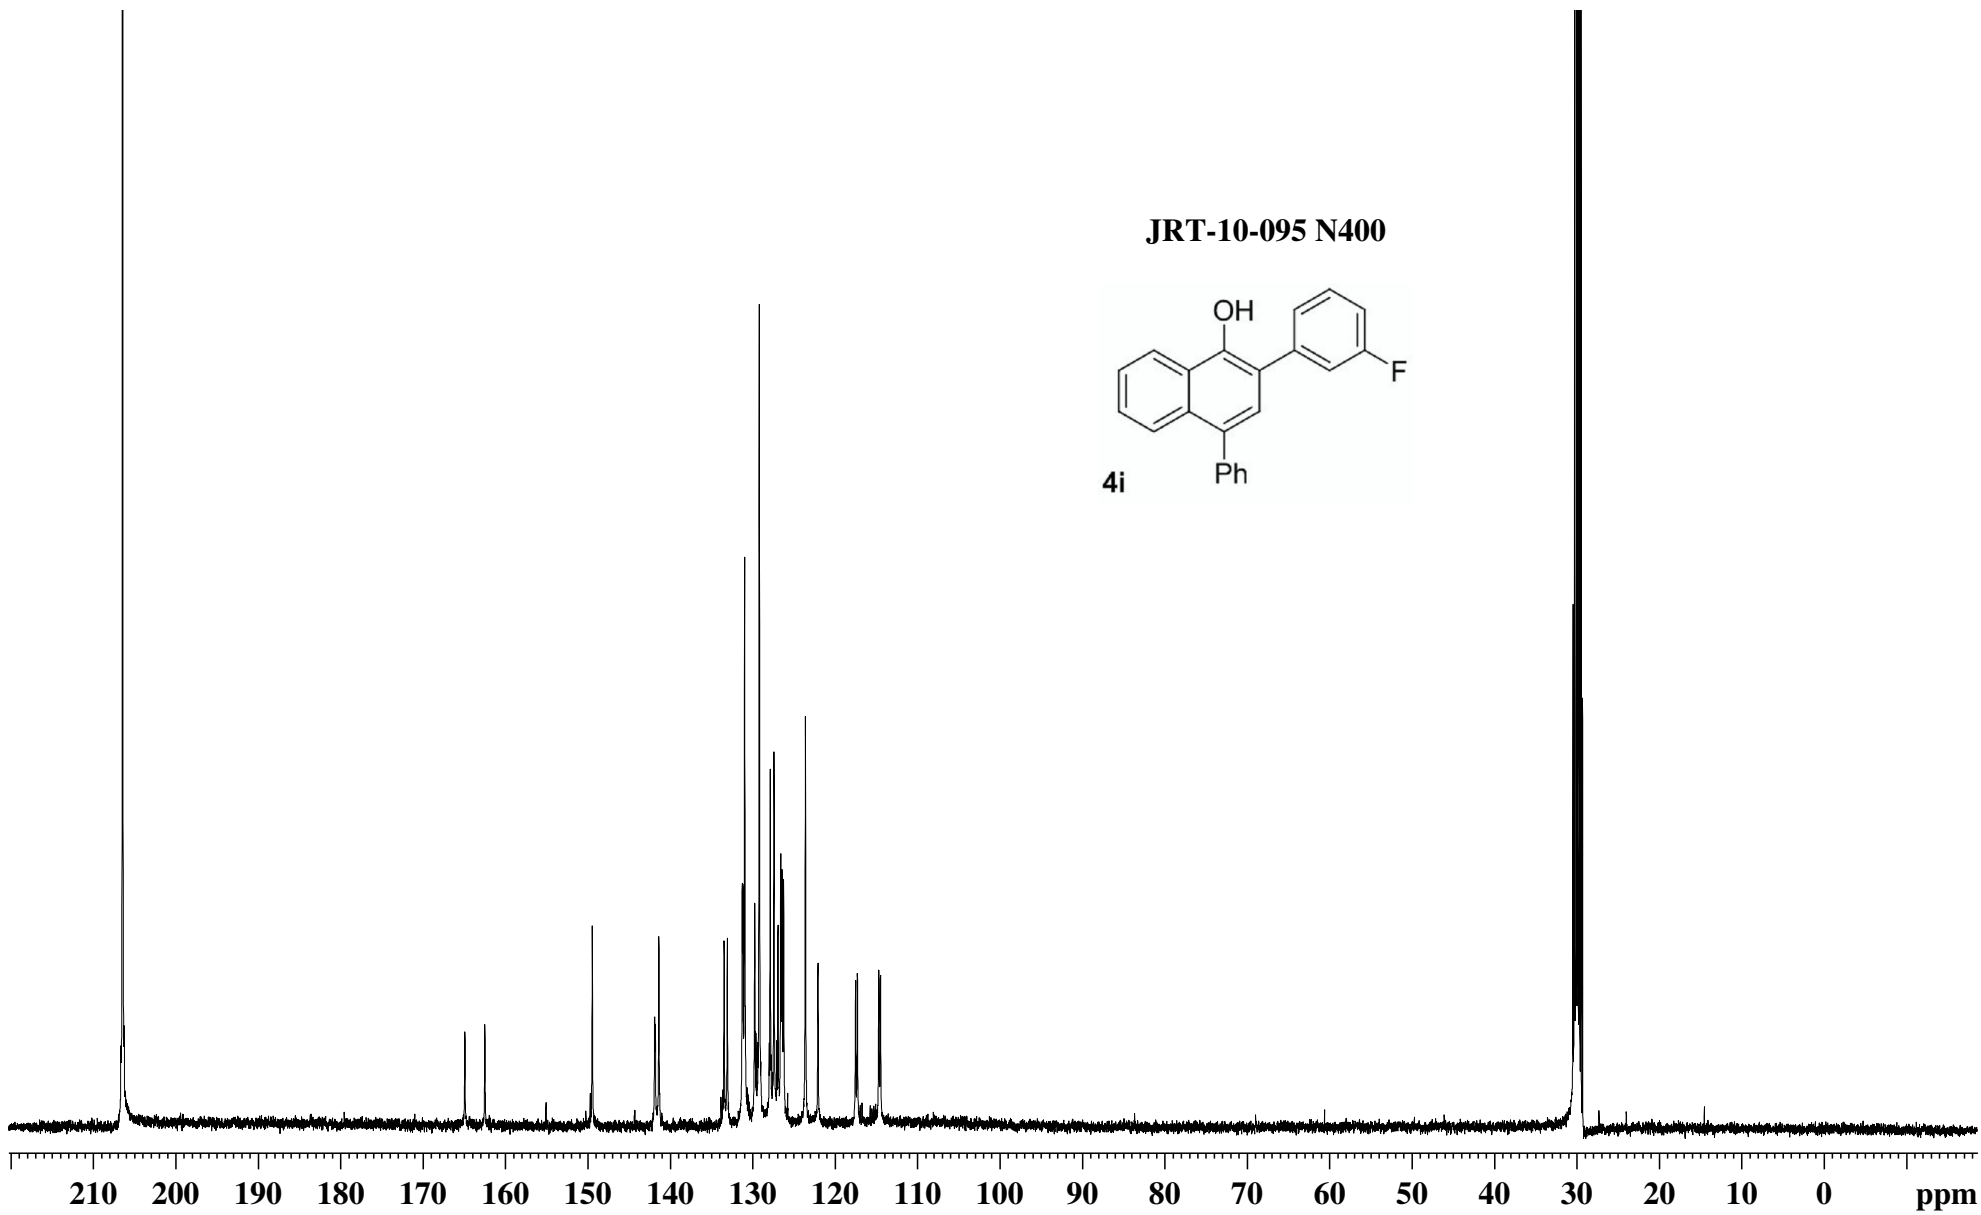

8.366  
8.345  
7.896  
7.875  
7.570  
7.549  
7.536  
7.500  
7.479  
7.459  
7.442  
7.407  
7.390  
7.374  
7.347  
7.282  
7.264  
7.224  
7.204  
7.183  
6.373

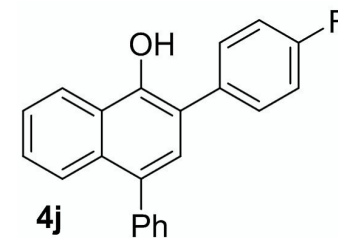

**JRT-10-008 in MeOH**

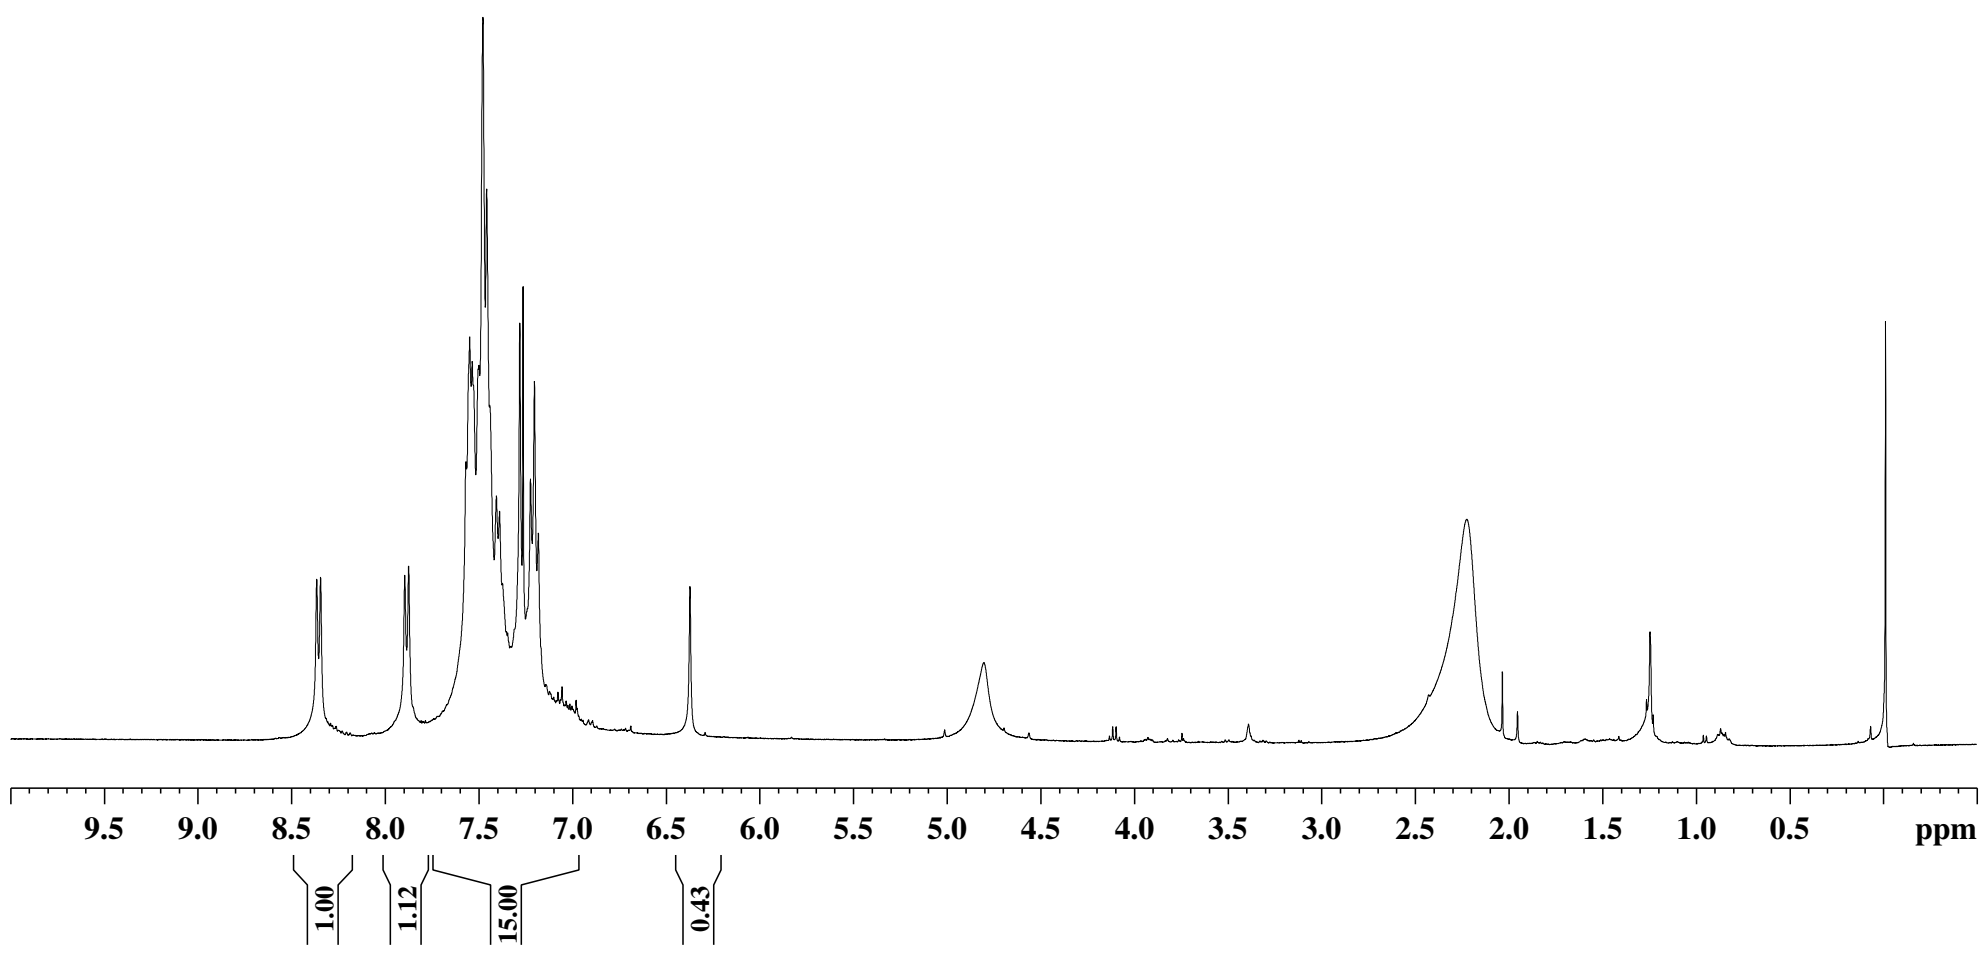

163.522  
161.065  
147.369  
140.381  
133.421  
132.774  
132.036  
131.237  
131.156  
130.155  
128.794  
128.591  
128.445  
128.199  
126.949  
126.508  
125.753  
125.457  
124.683  
122.486  
120.099  
116.322  
116.109

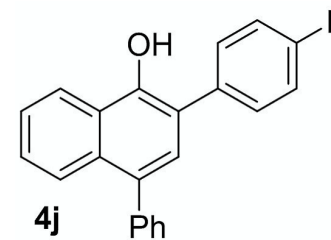

**JRT-10-008 in MeOH**

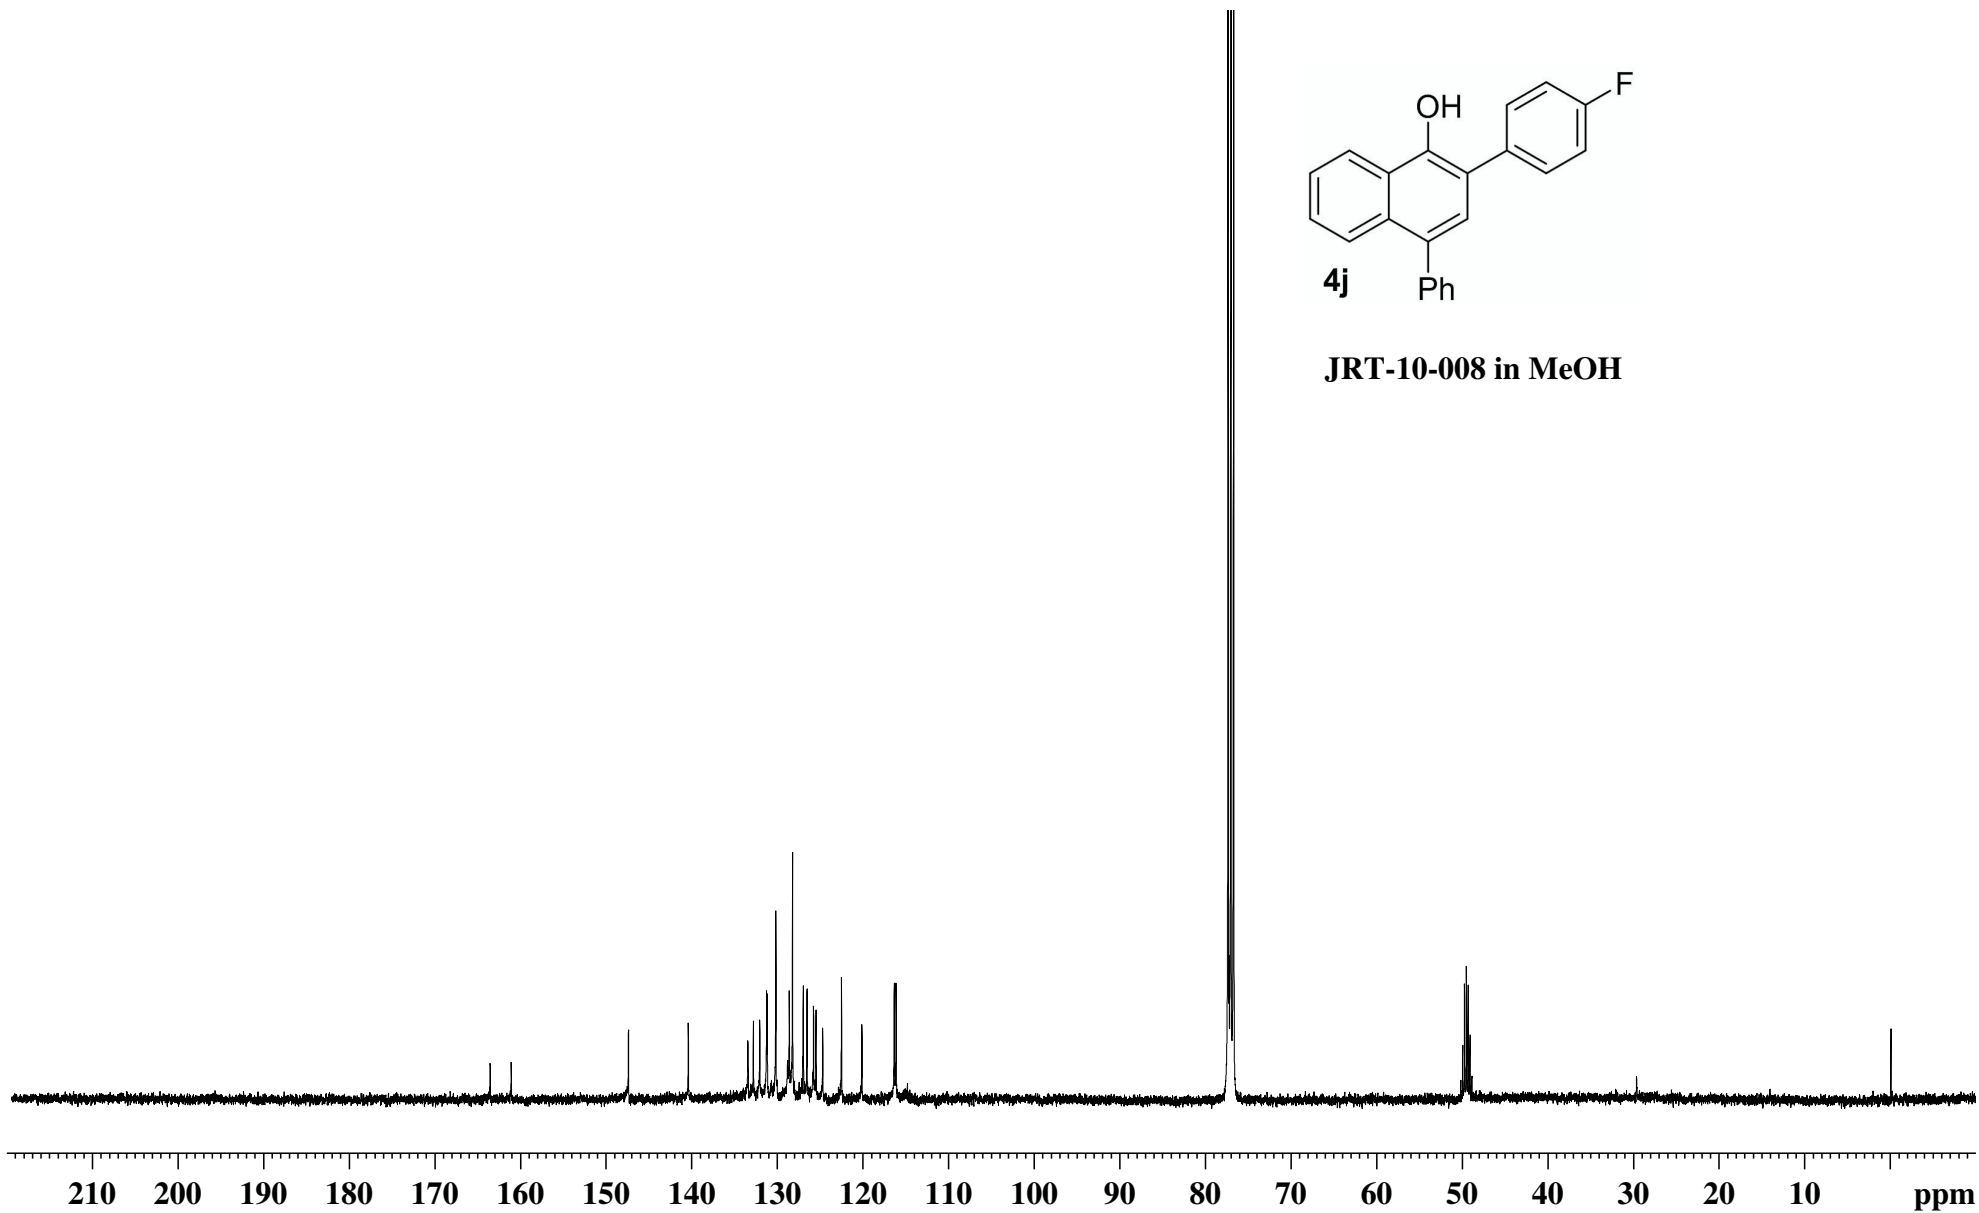

8.567  
8.467  
8.447  
7.876  
7.855  
7.700  
7.652  
7.633  
7.608  
7.589  
7.560  
7.540  
7.504  
7.490  
7.470  
7.450  
7.426  
7.410  
7.383  
7.364  
7.350  
7.331

JRT-10-087B -con 400 MHz

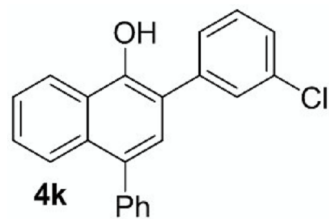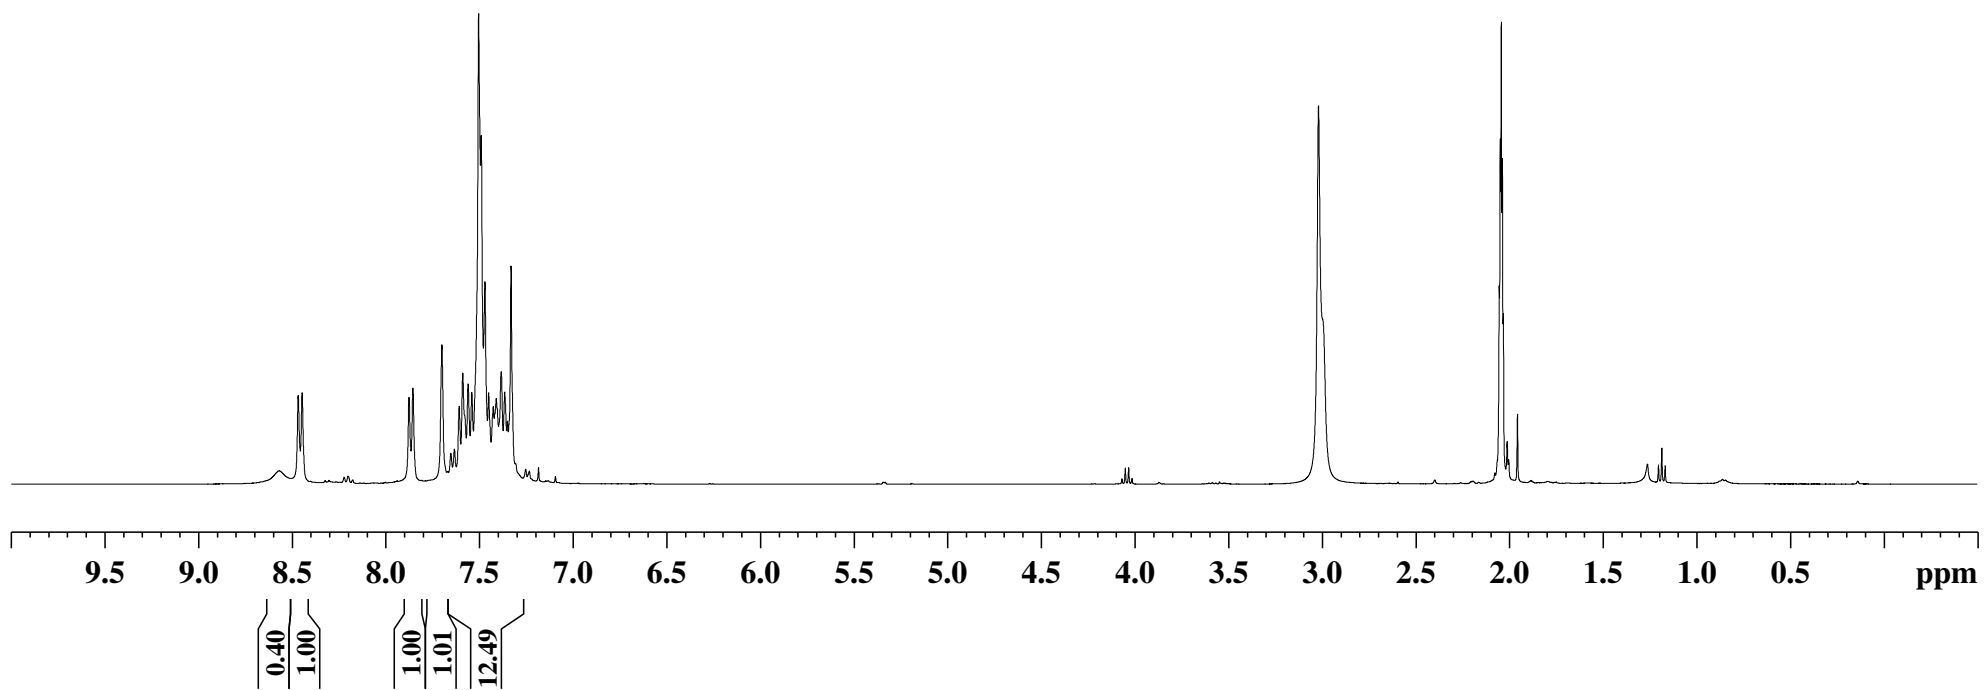

148.647  
140.765  
140.497  
133.802  
132.626  
132.229  
130.220  
130.127  
129.715  
128.876  
128.672  
128.365  
127.045  
127.022  
126.608  
126.066  
125.570  
125.425  
122.741  
121.101

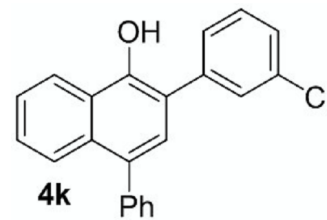

JRT-10-087B -con 400 MHz

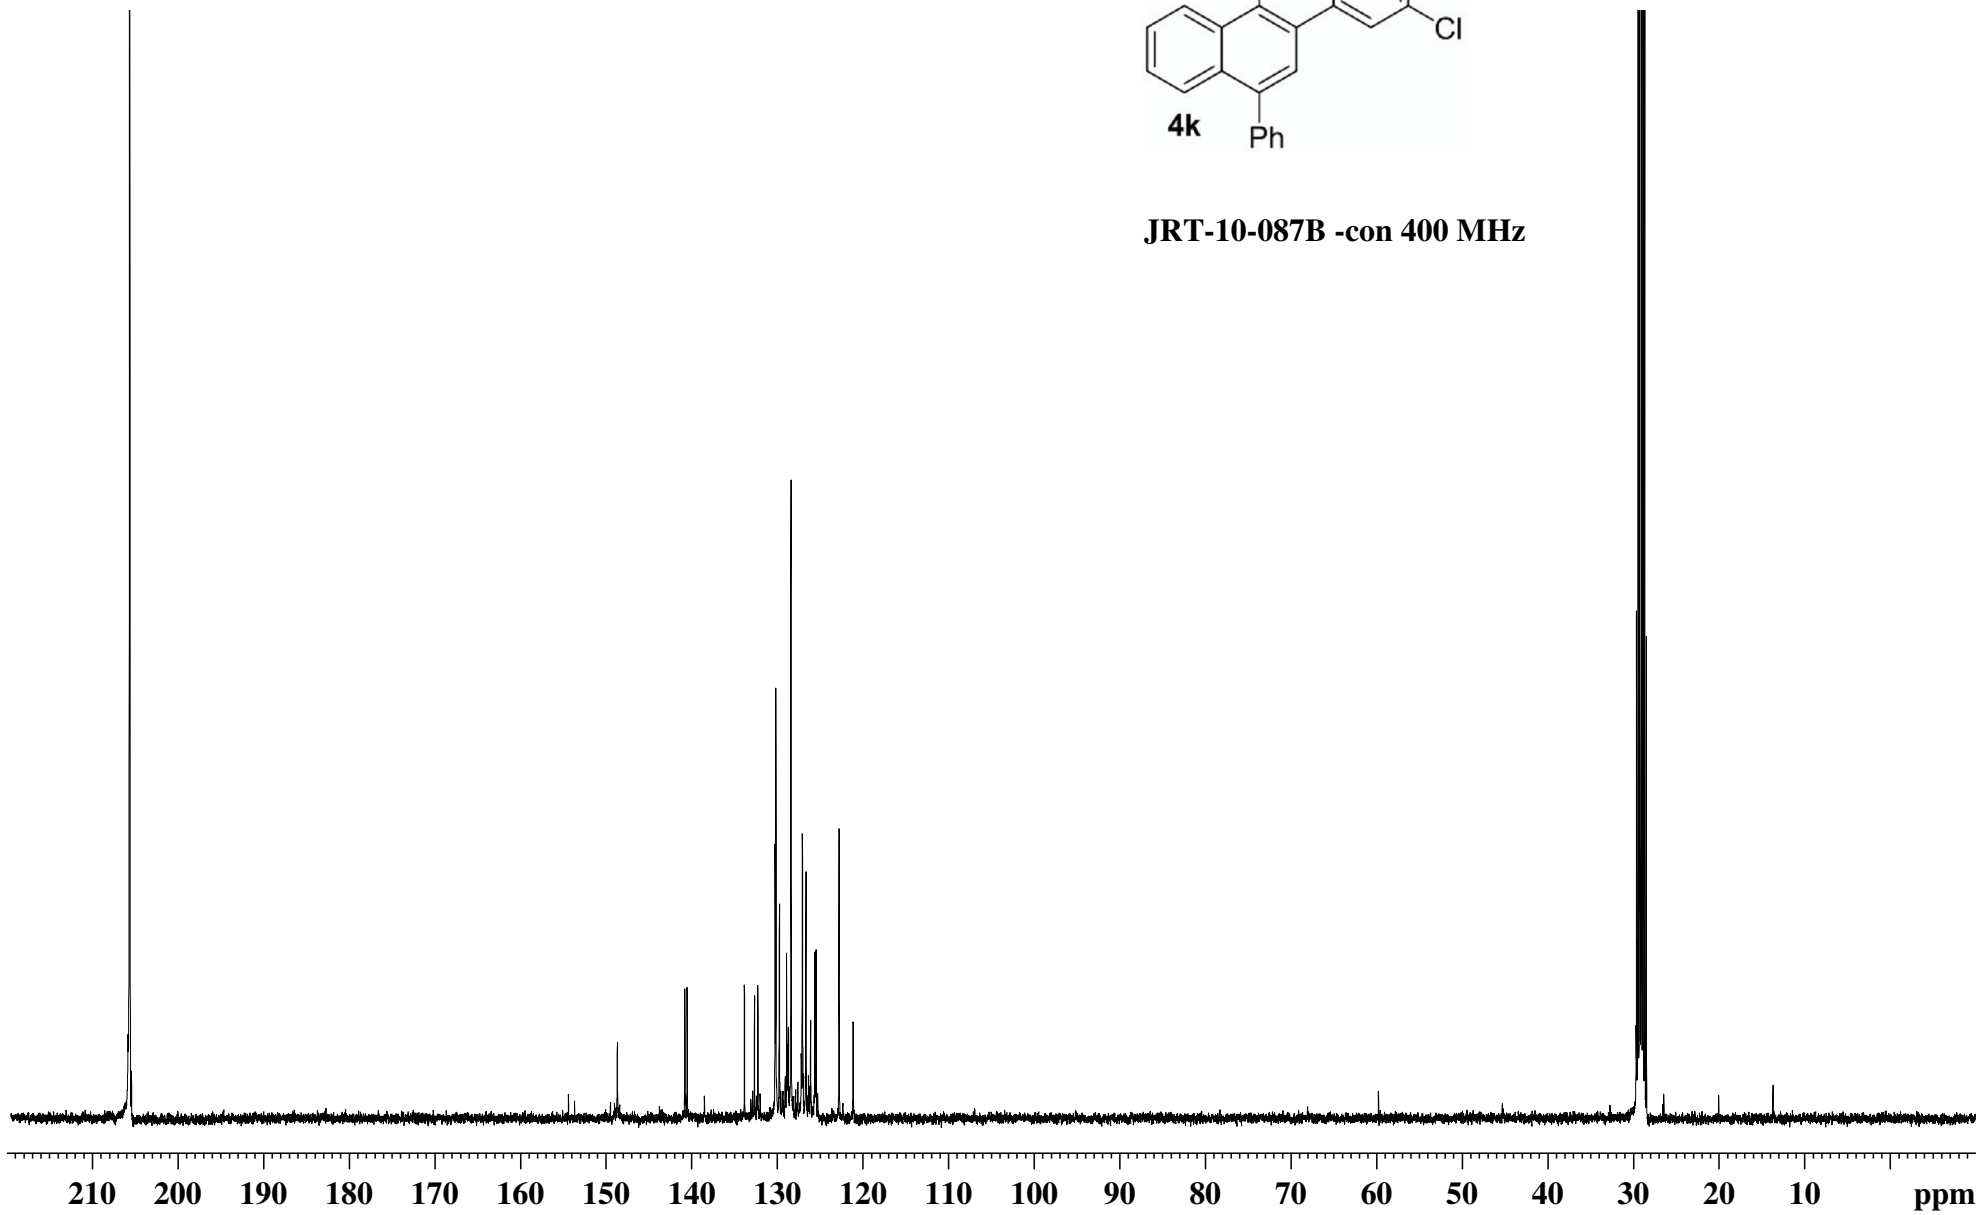



8.462  
8.442  
8.366  
7.877  
7.856  
7.685  
7.681  
7.669  
7.664  
7.583  
7.581  
7.566  
7.563  
7.546  
7.543  
7.512  
7.500  
7.479  
7.444  
7.436  
7.432  
7.428  
7.422  
7.415  
7.326

JRT-10-130 acetone-d6 400 MHz

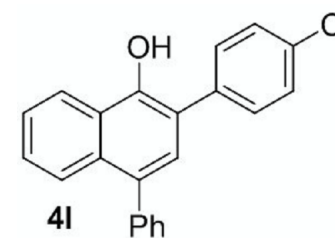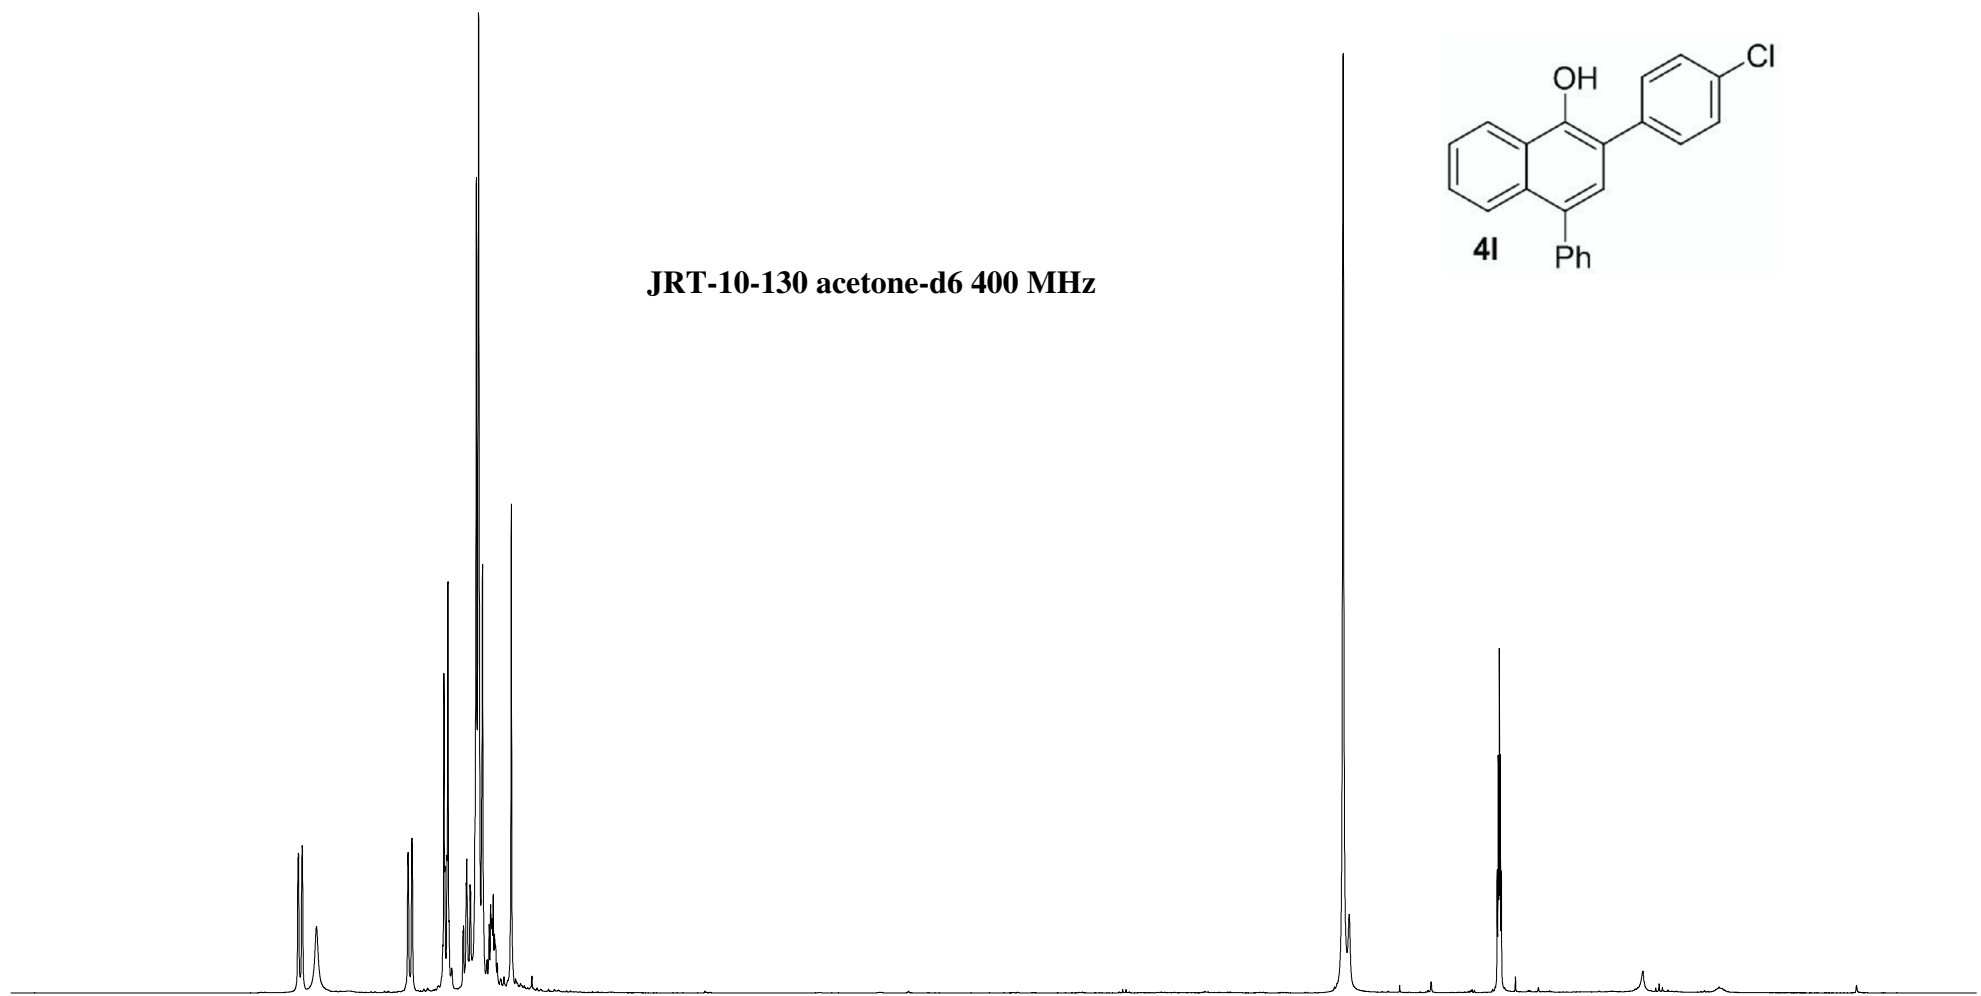

9.5 9.0 8.5 8.0 7.5 7.0 6.5 6.0 5.5 5.0 4.5 4.0 3.5 3.0 2.5 2.0 1.5 1.0 0.5 ppm

1.00  
0.69  
0.99  
2.04  
1.19  
5.32  
1.36  
1.06  
1.06

149.403  
141.413  
138.230  
133.452  
133.393  
133.011  
132.393  
130.979  
129.798  
129.486  
129.213  
127.892  
127.361  
126.894  
126.418  
126.242  
123.546  
122.069

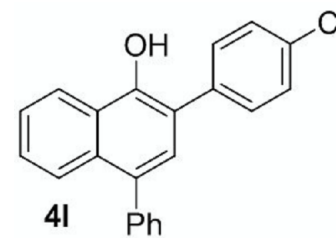

JRT-10-130

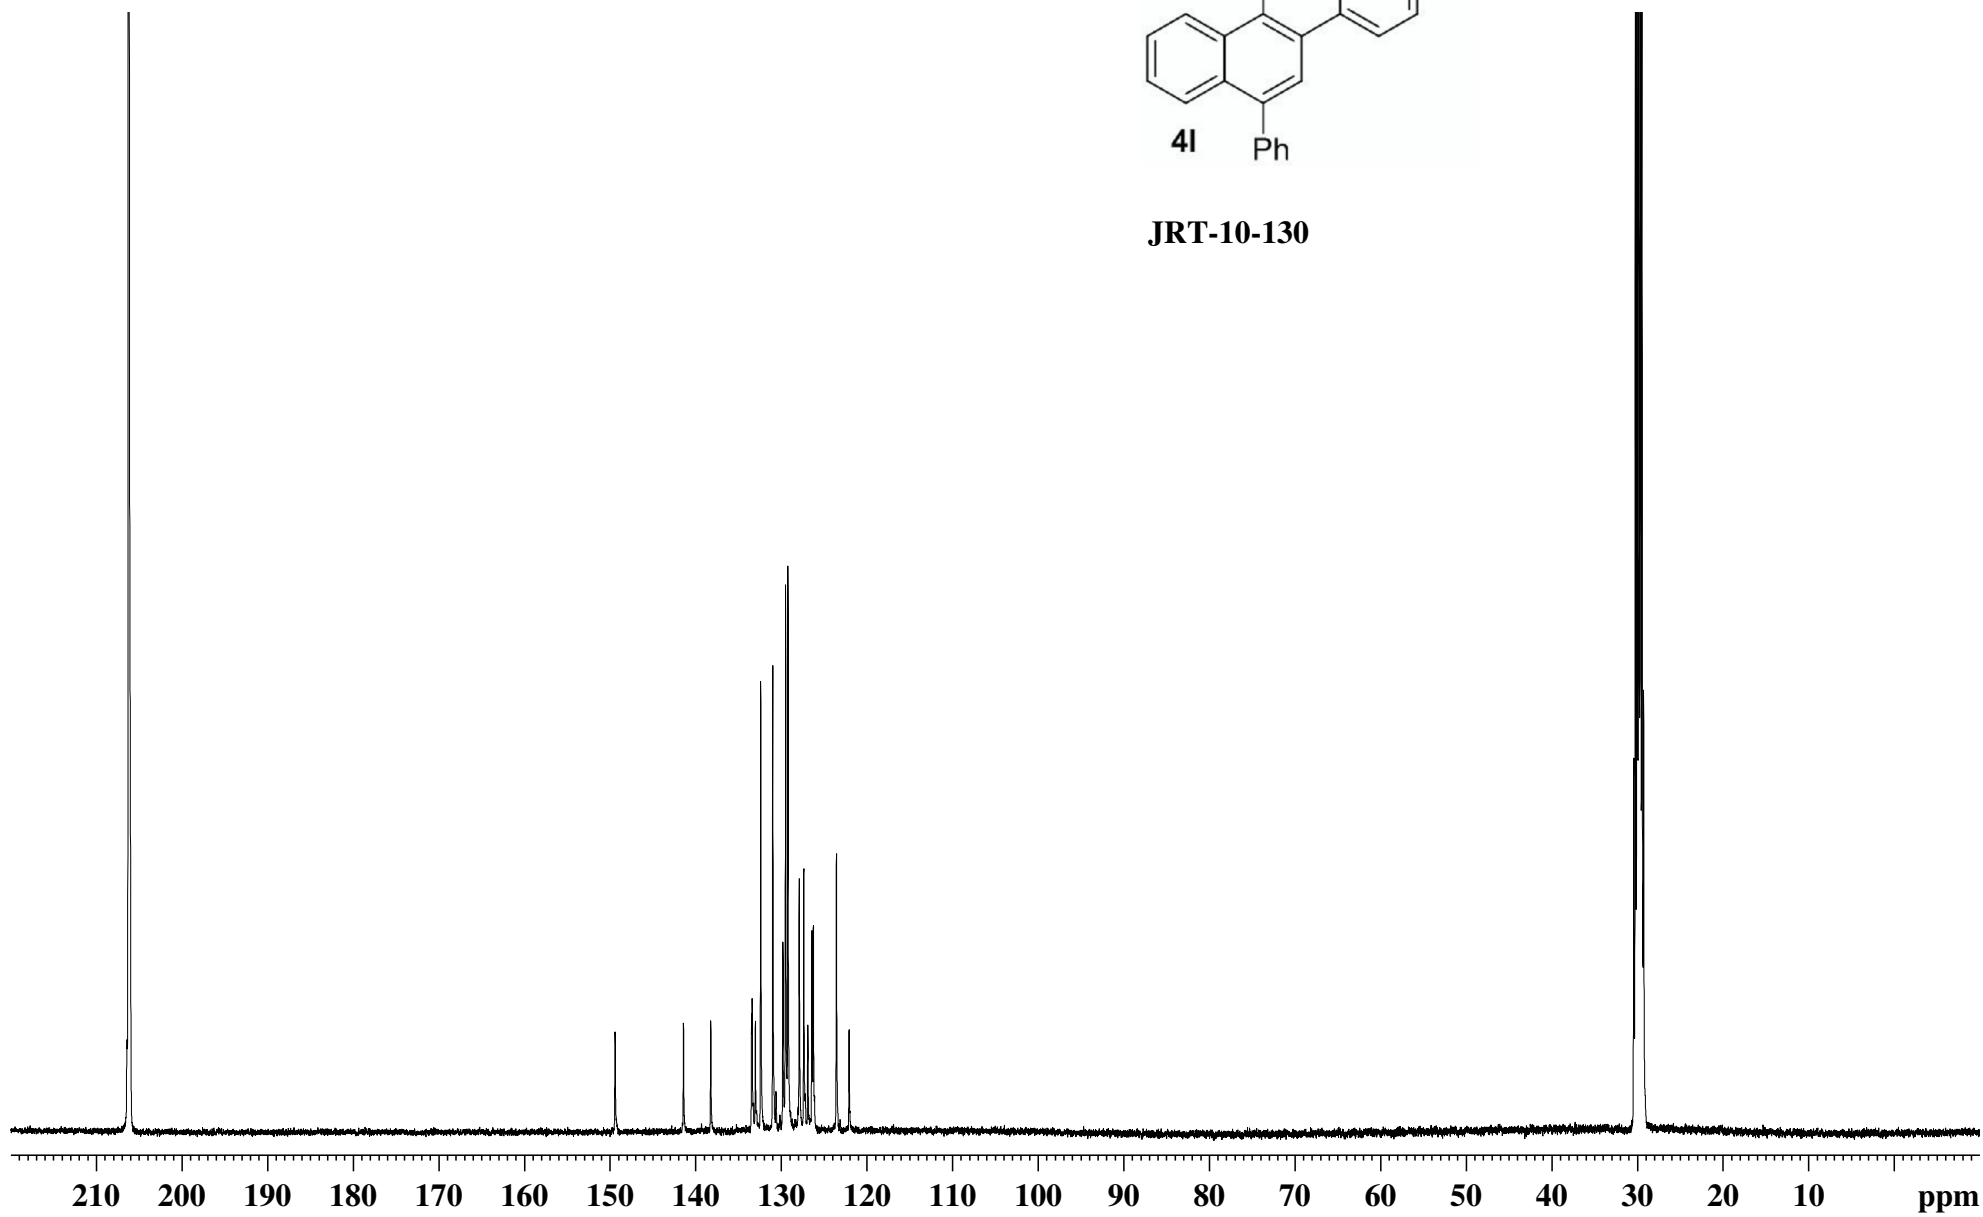

8.493  
8.472  
8.144  
7.895  
7.874  
7.568  
7.550  
7.529  
7.507  
7.485  
7.473  
7.420  
7.400  
7.380  
7.360  
7.221  
7.217  
7.207  
7.187  
6.940  
6.924

JRT-10-090 (N400 NMR)

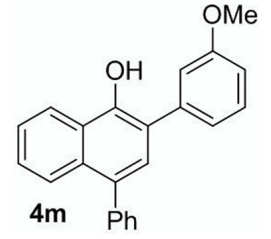

3.841

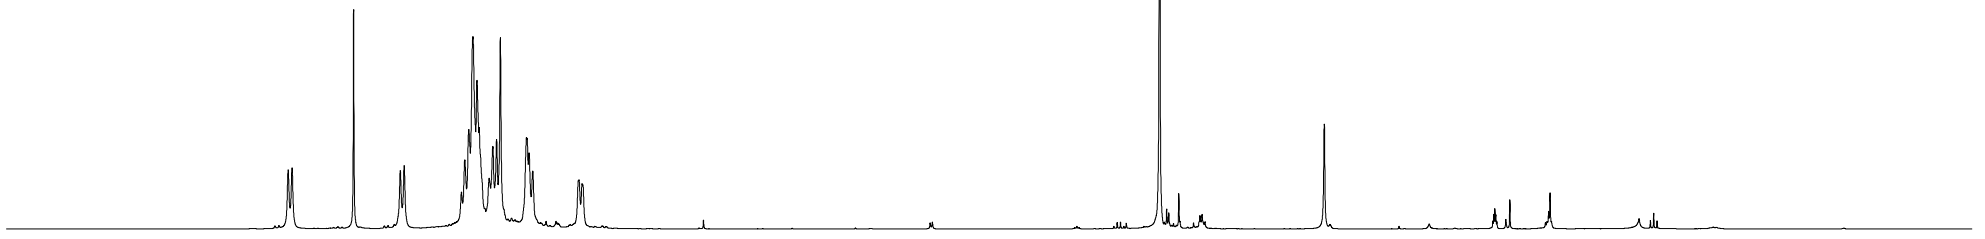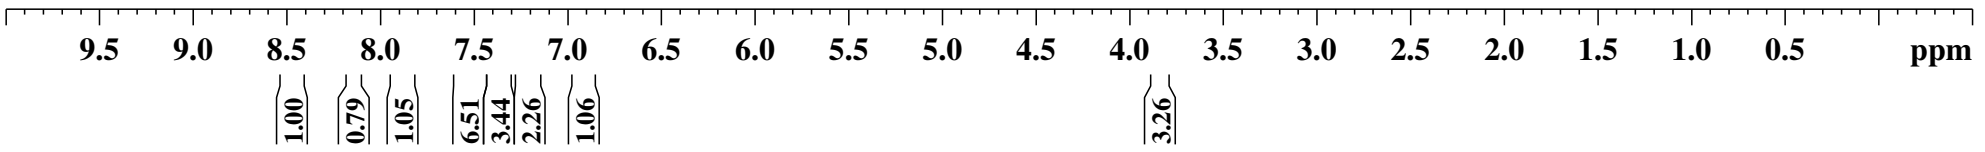

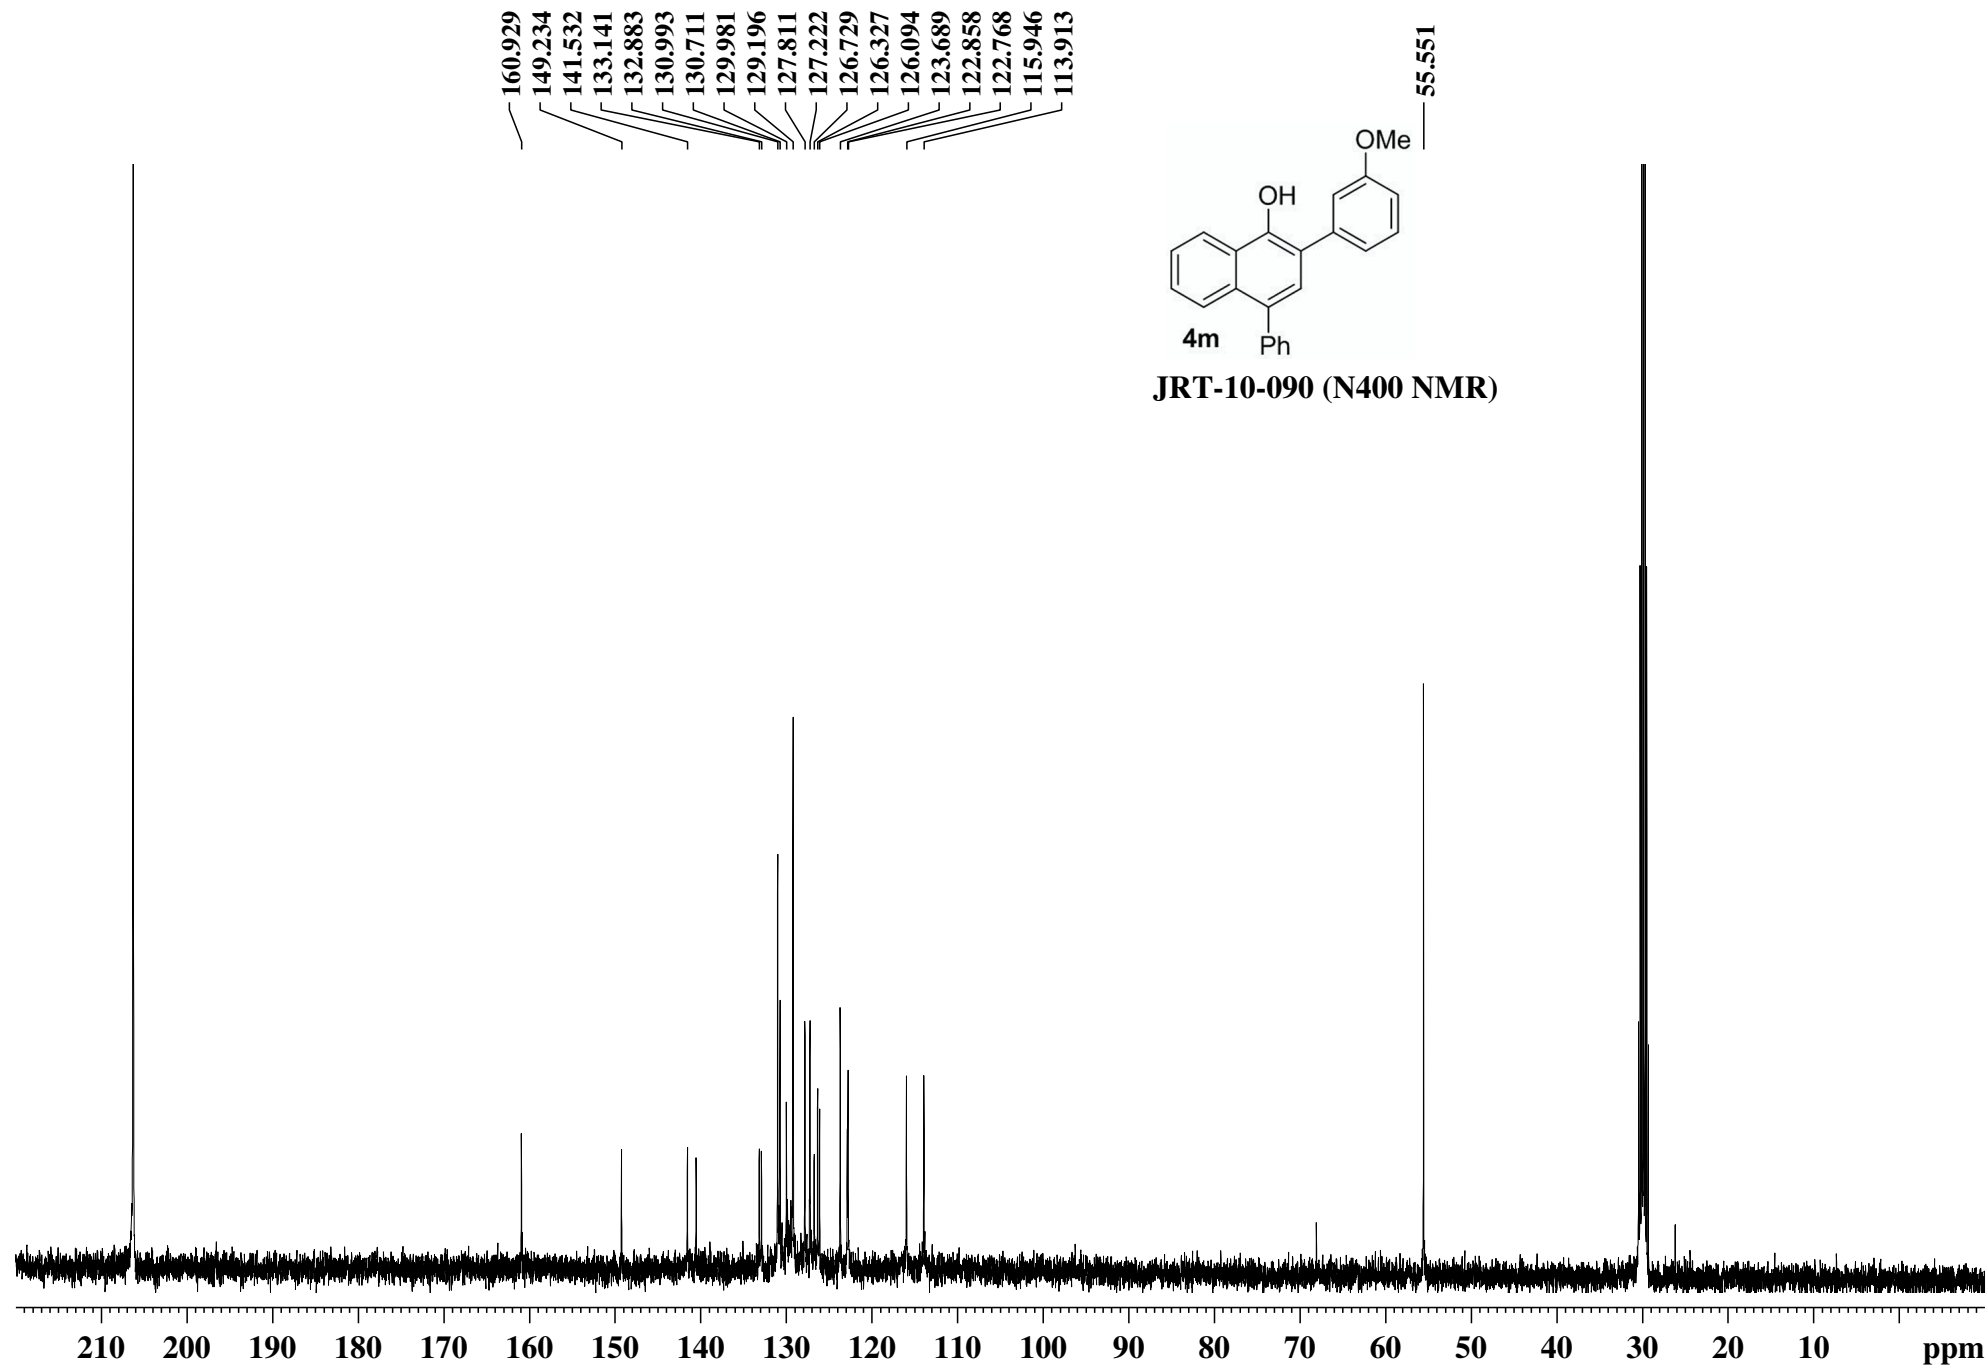

7.817  
7.799  
7.498  
7.492  
7.474  
7.470  
7.452  
7.435  
7.430  
7.421  
7.415  
7.409  
7.398  
7.387  
7.378  
7.369  
7.363  
7.355  
7.338  
7.331  
7.315  
7.290  
7.266  
7.253  
7.246  
7.244  
7.242  
7.194  
7.179  
7.170  
7.155  
7.143  
7.121  
7.112  
5.144

2.790  
2.764  
2.739  
1.748  
1.723  
1.697  
1.687  
1.672  
1.646  
1.584  
1.510  
1.486  
1.461  
1.436  
1.411  
1.398  
1.387  
0.988  
0.964  
0.940

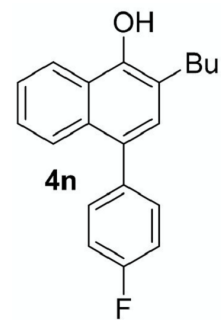

JRT-9-182 F2 300 MHz, CDCl<sub>3</sub>

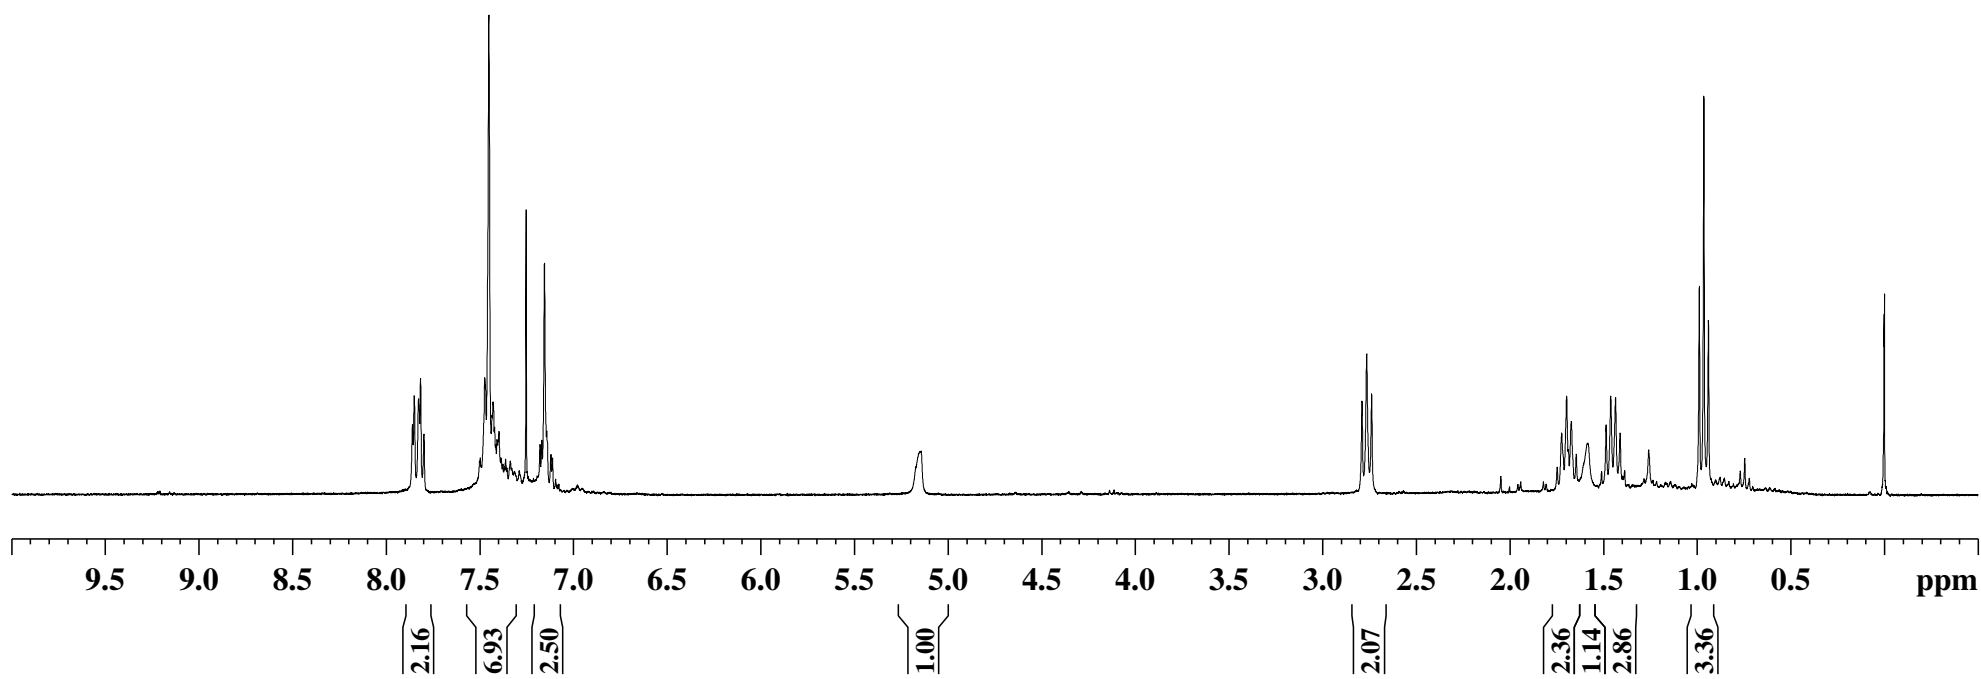

162.142  
158.894  
147.282  
147.211  
140.576  
133.033  
130.157  
129.757  
128.625  
128.556  
128.440  
128.319  
128.277  
127.699  
127.049  
125.699  
125.583  
121.743  
115.822  
115.489  
105.581  
105.287

32.156  
29.720  
22.674  
13.946

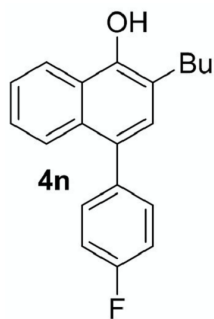

JRT-9-182 F2 300 MHz, CDCl<sub>3</sub>

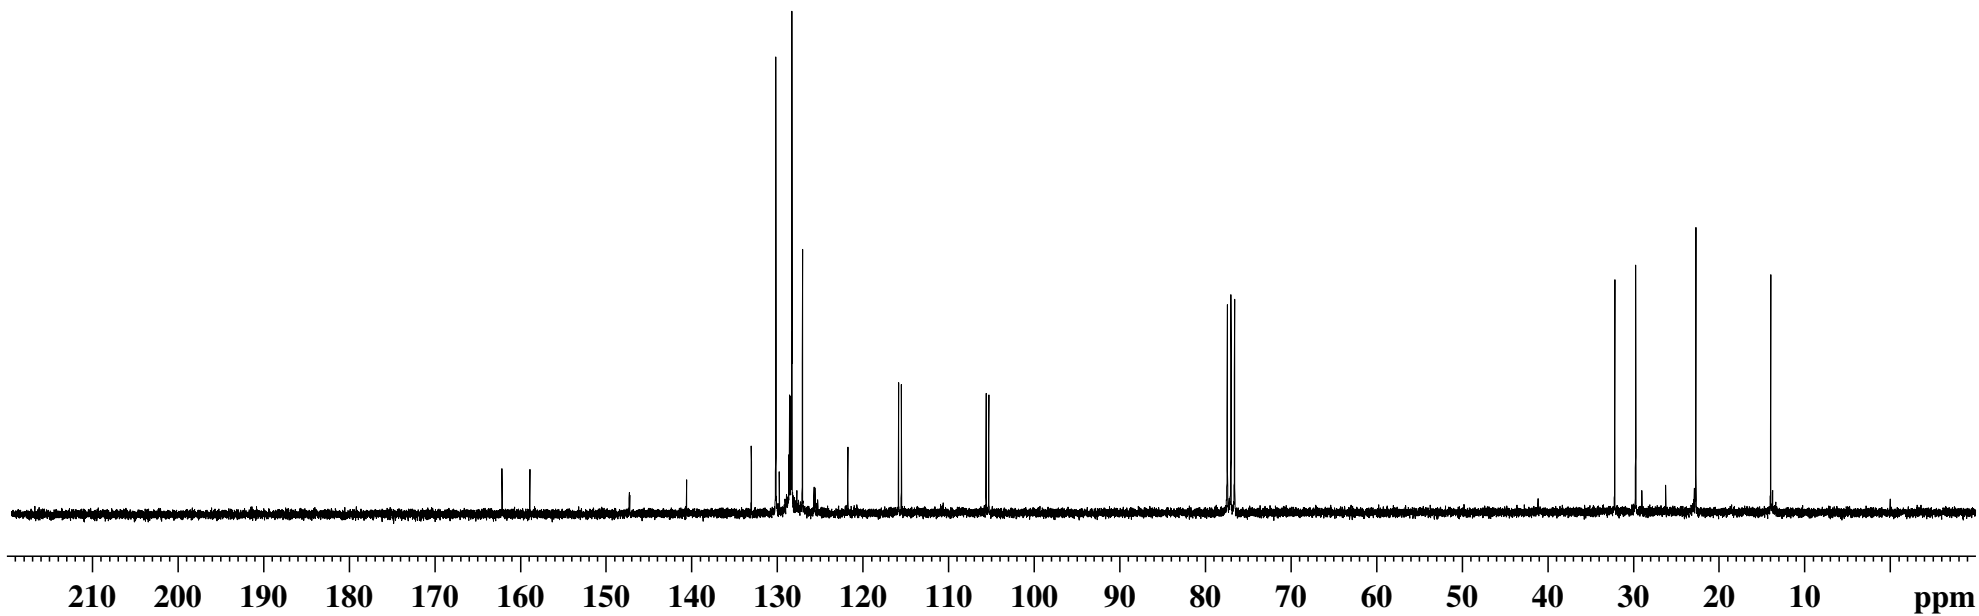

8.209  
8.188  
7.865  
7.844  
7.492  
7.474  
7.456  
7.402  
7.381  
7.361  
7.183  
7.021  
7.000

5.265  
5.256

3.878

2.785  
2.766  
2.747  
1.725  
1.706  
1.687  
1.681  
1.668  
1.648  
1.482  
1.464  
1.445  
1.426  
1.408  
1.390  
0.970  
0.952  
0.933

**JRT-10-010**

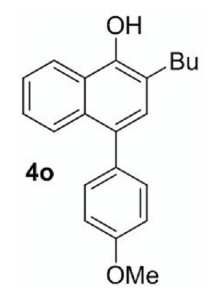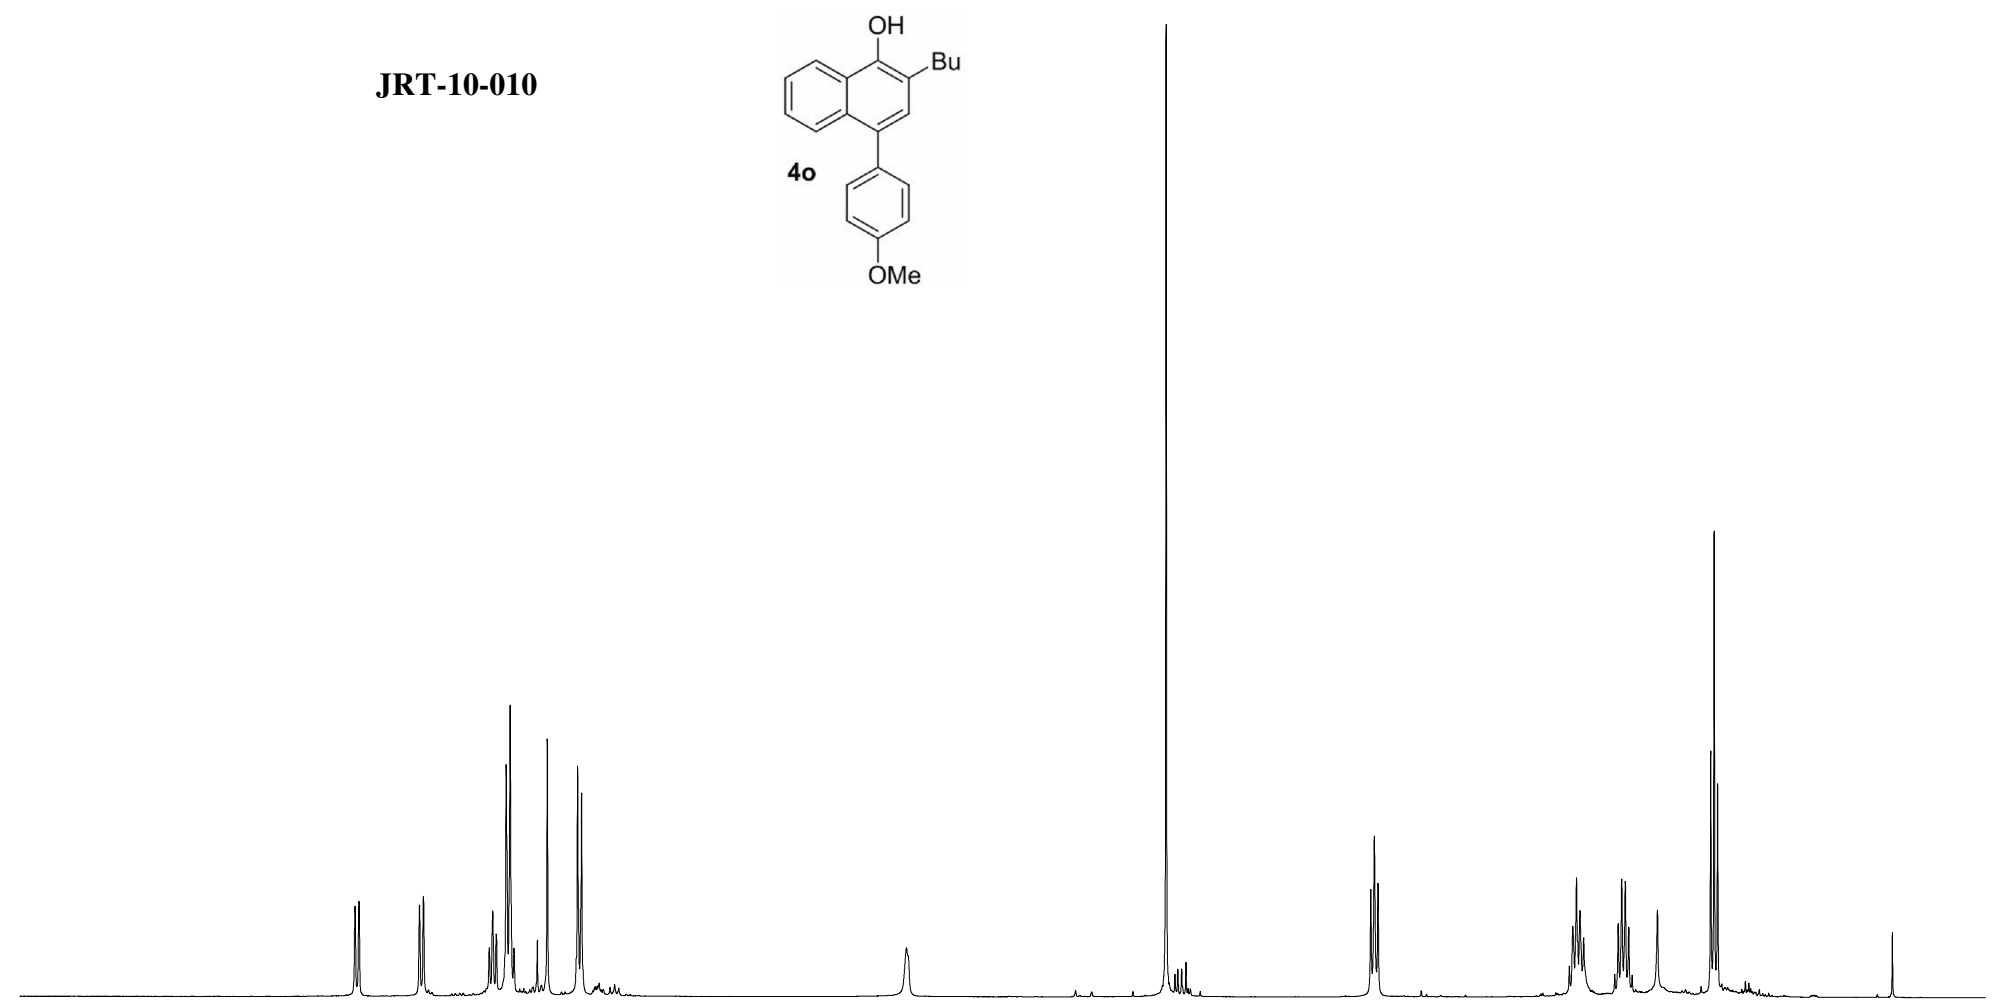

9.5 9.0 8.5 8.0 7.5 7.0 6.5 6.0 5.5 5.0 4.5 4.0 3.5 3.0 2.5 2.0 1.5 1.0 0.5 ppm

1.00  
1.12  
1.21  
3.24  
1.08  
2.17

0.85

3.08

1.95

2.68  
2.36

3.60

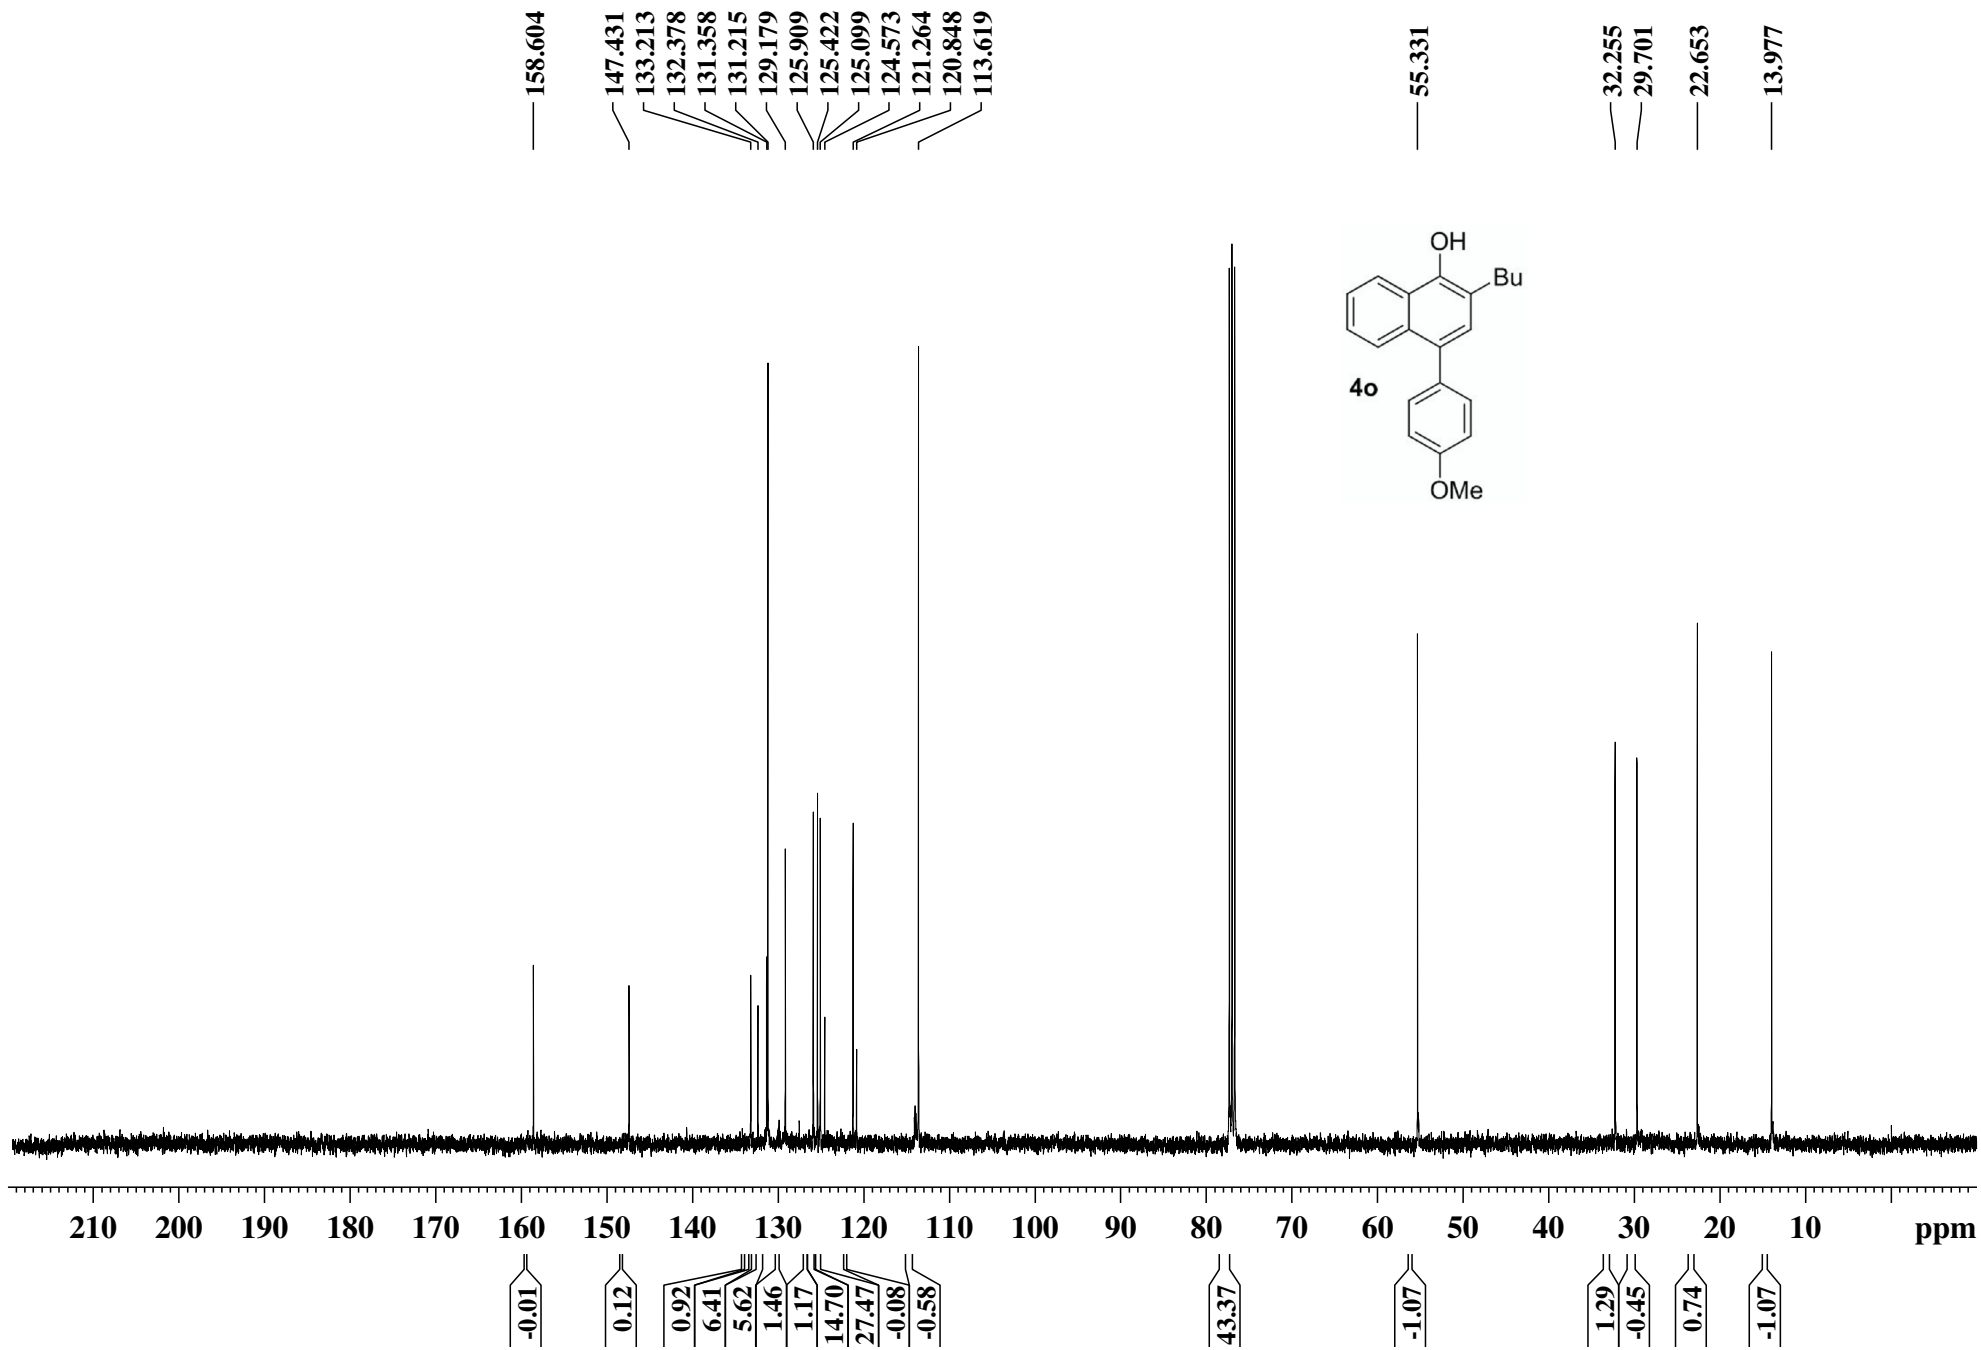



8.053  
7.835  
7.813  
7.784  
7.659  
7.643  
7.471  
7.391  
7.374  
7.200  
7.162  
7.140  
7.059  
6.987  
6.969

3.953  
3.844

JRT-10-092 (N400 NMR)

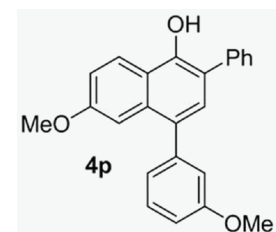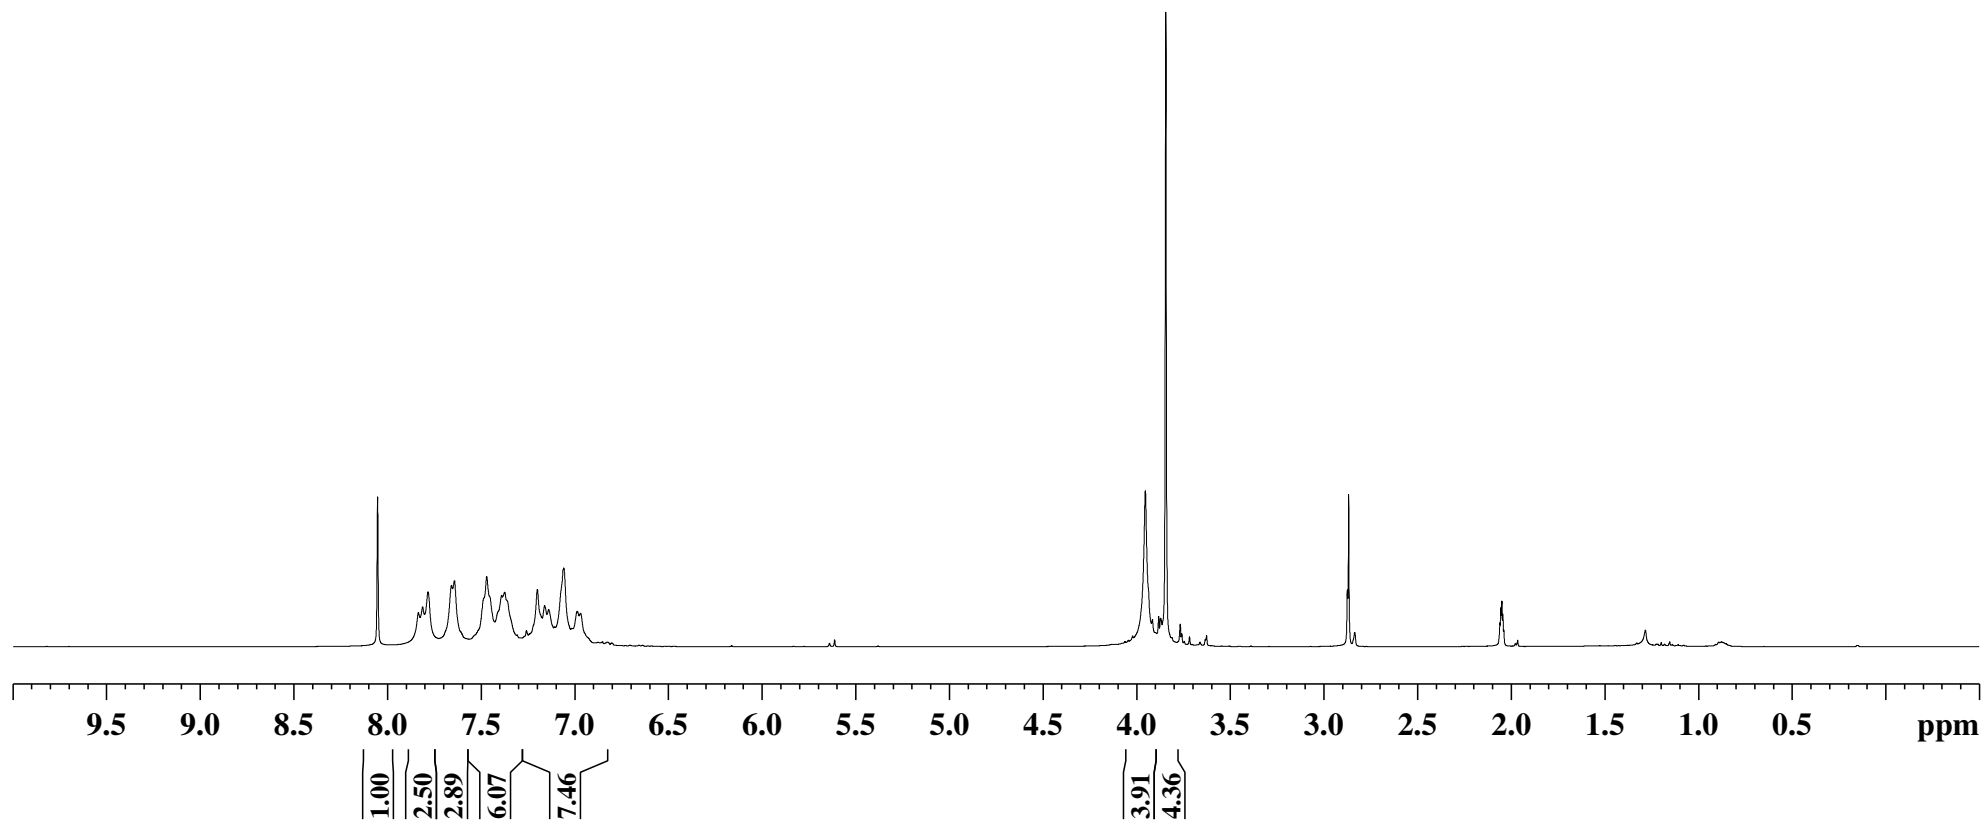

160.661  
158.505  
148.329  
143.083  
139.513  
133.239  
130.580  
130.094  
129.870  
129.498  
128.773  
128.175  
127.958  
127.585  
123.728  
123.283  
119.508  
116.472  
113.345  
101.973

55.628  
55.541

JRT-10-092 N400

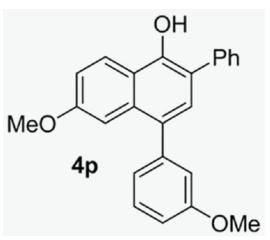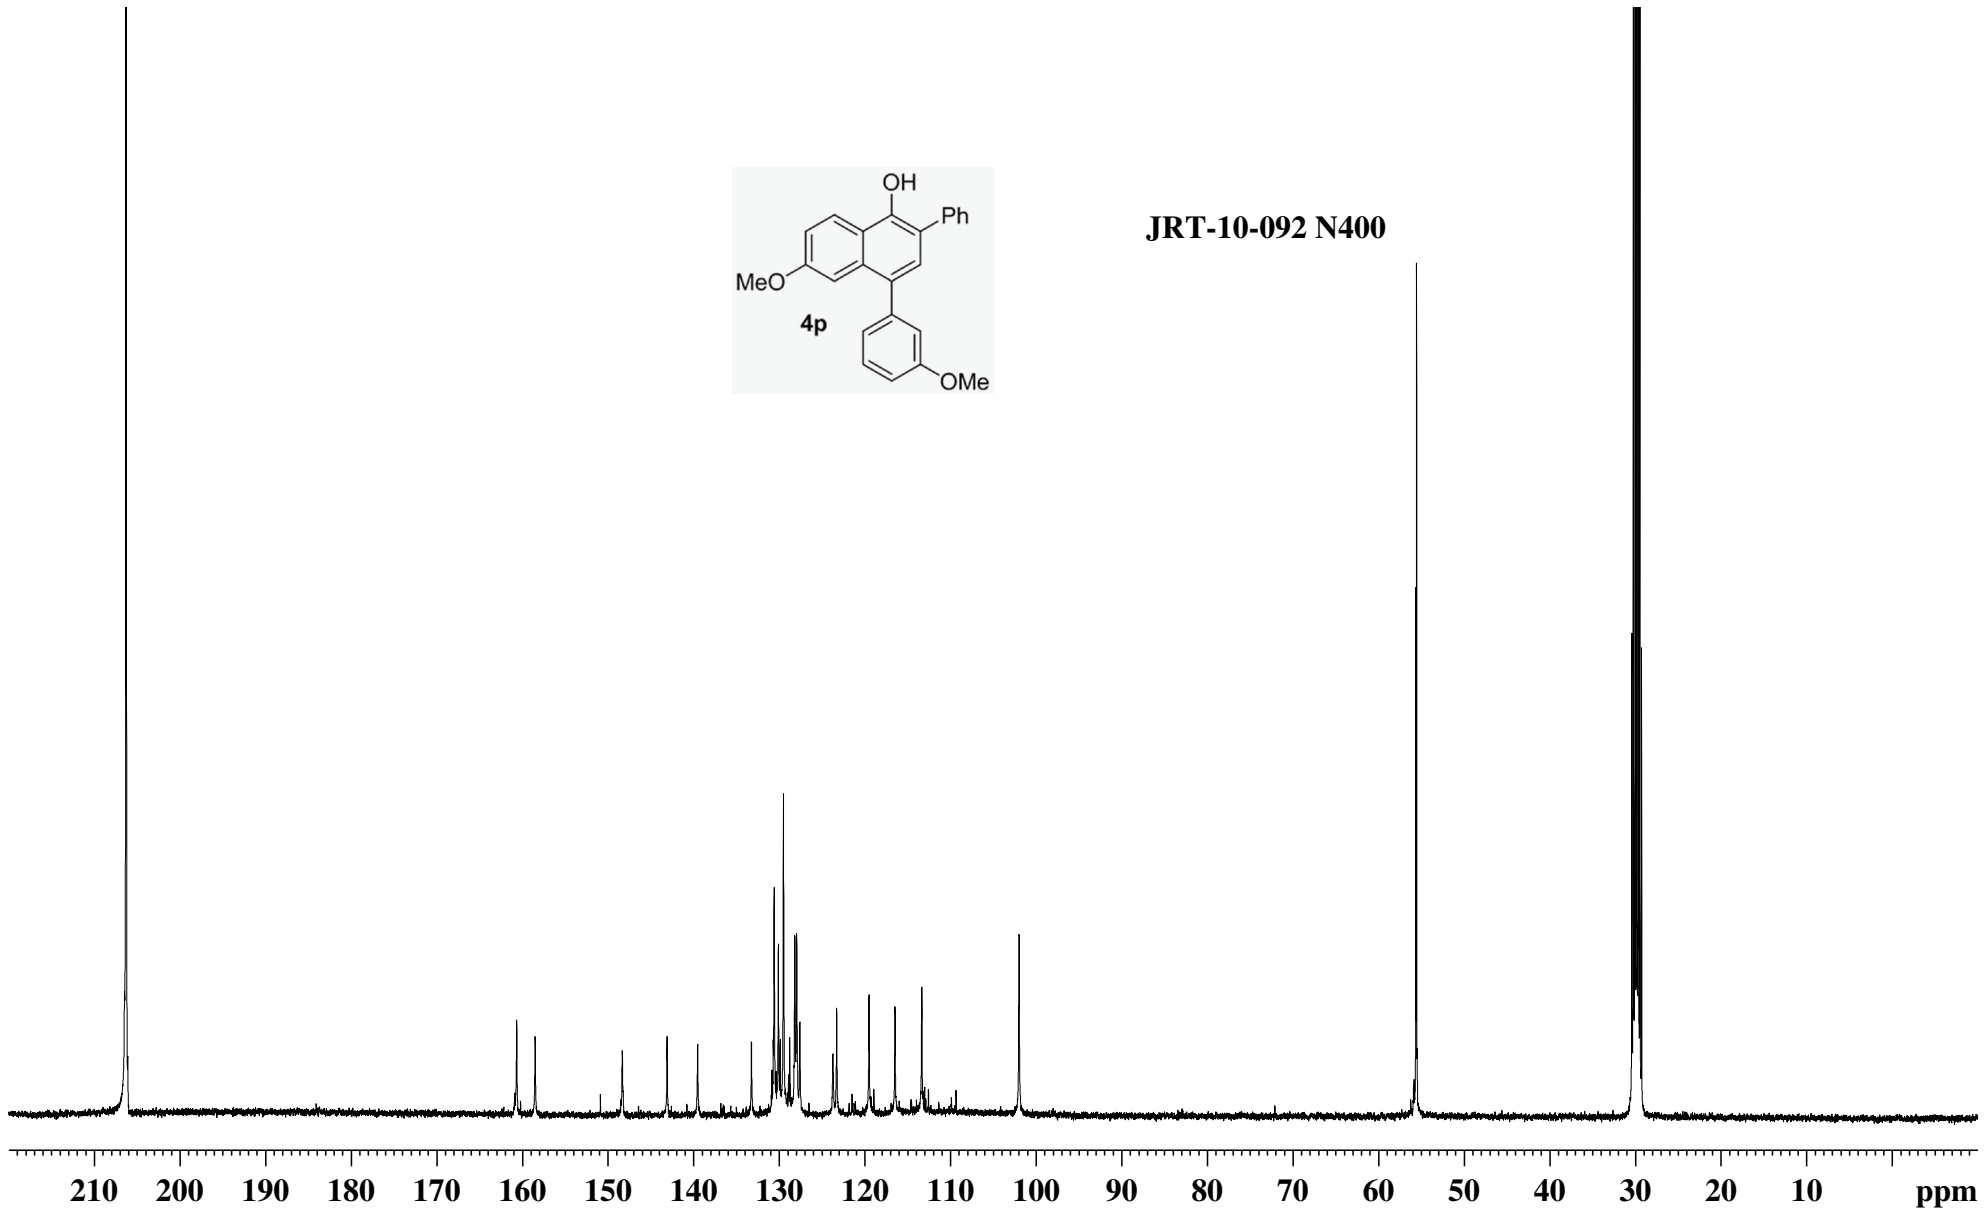

-116.550

JRT-10-086 19F 376 MHz in CDCl3

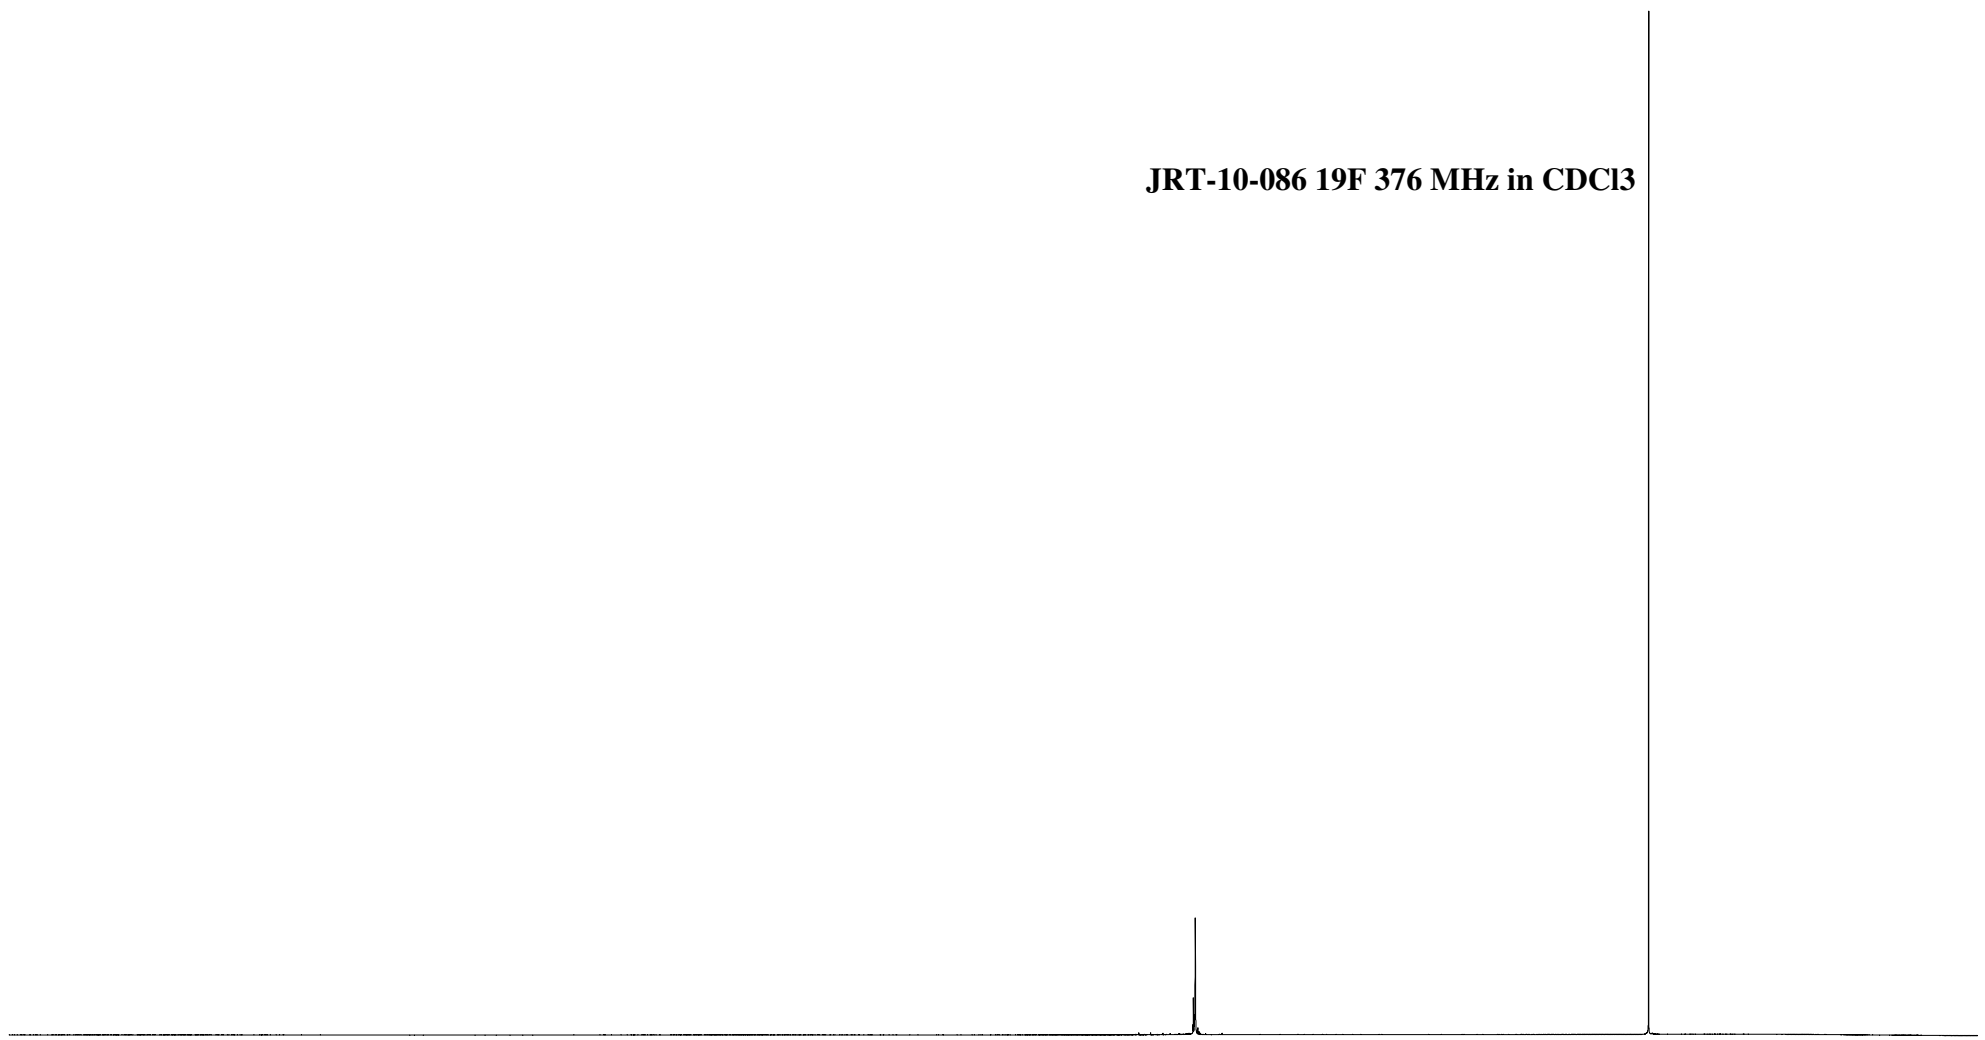

0 -20 -40 -60 -80 -100 -120 -140 -160 -180 ppm

S43

JRT-10-095 19F 396 MHz

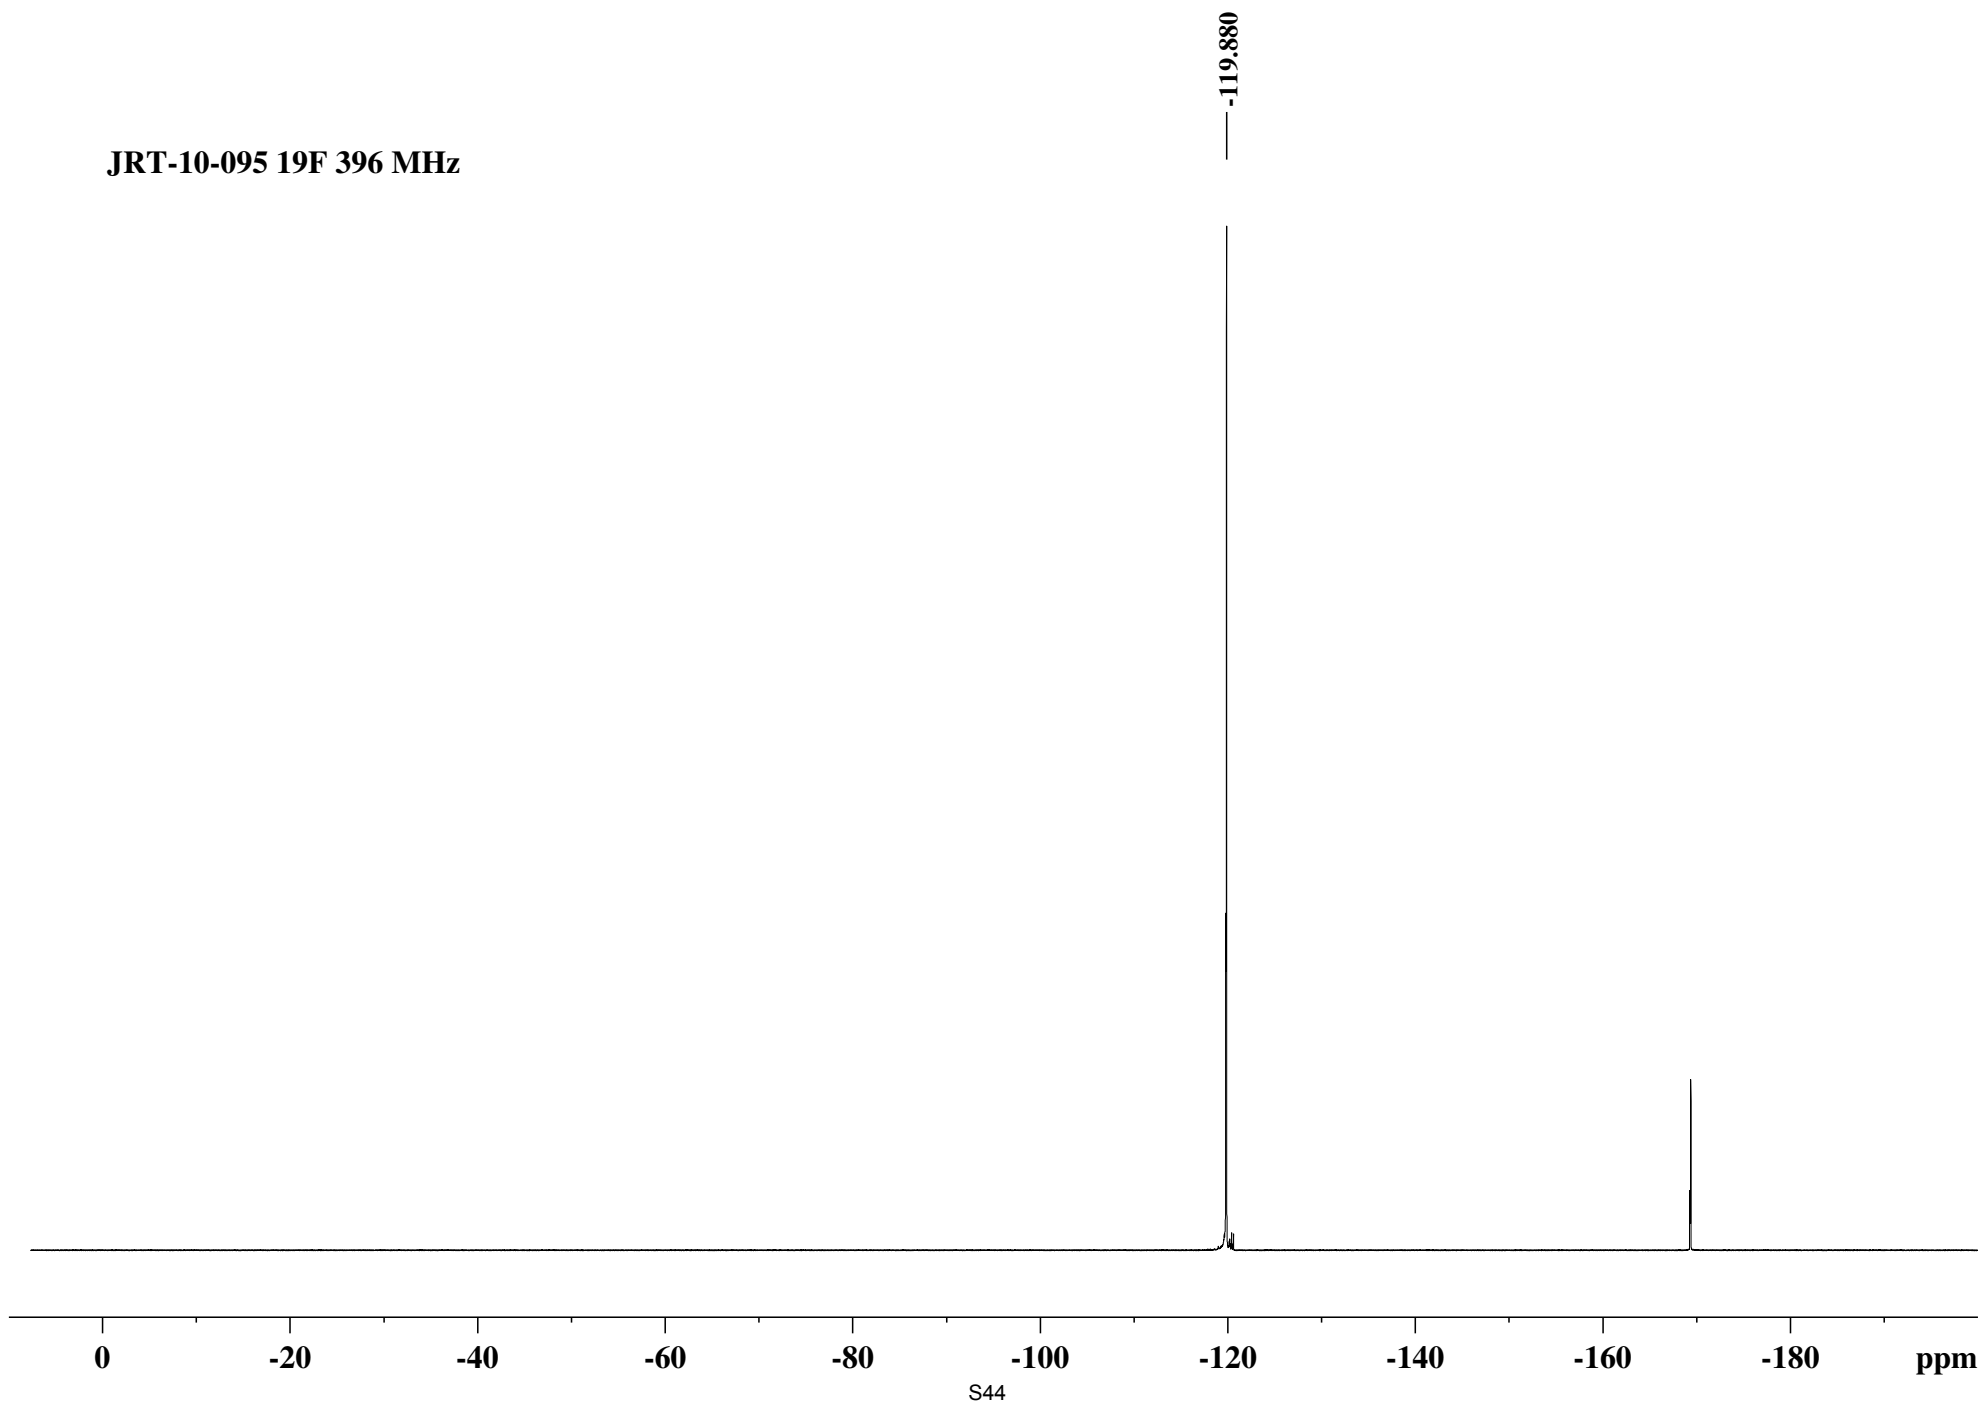

S44

-114.210

JRT-10-008 <sup>19</sup>F-NMR in CDCl<sub>3</sub>

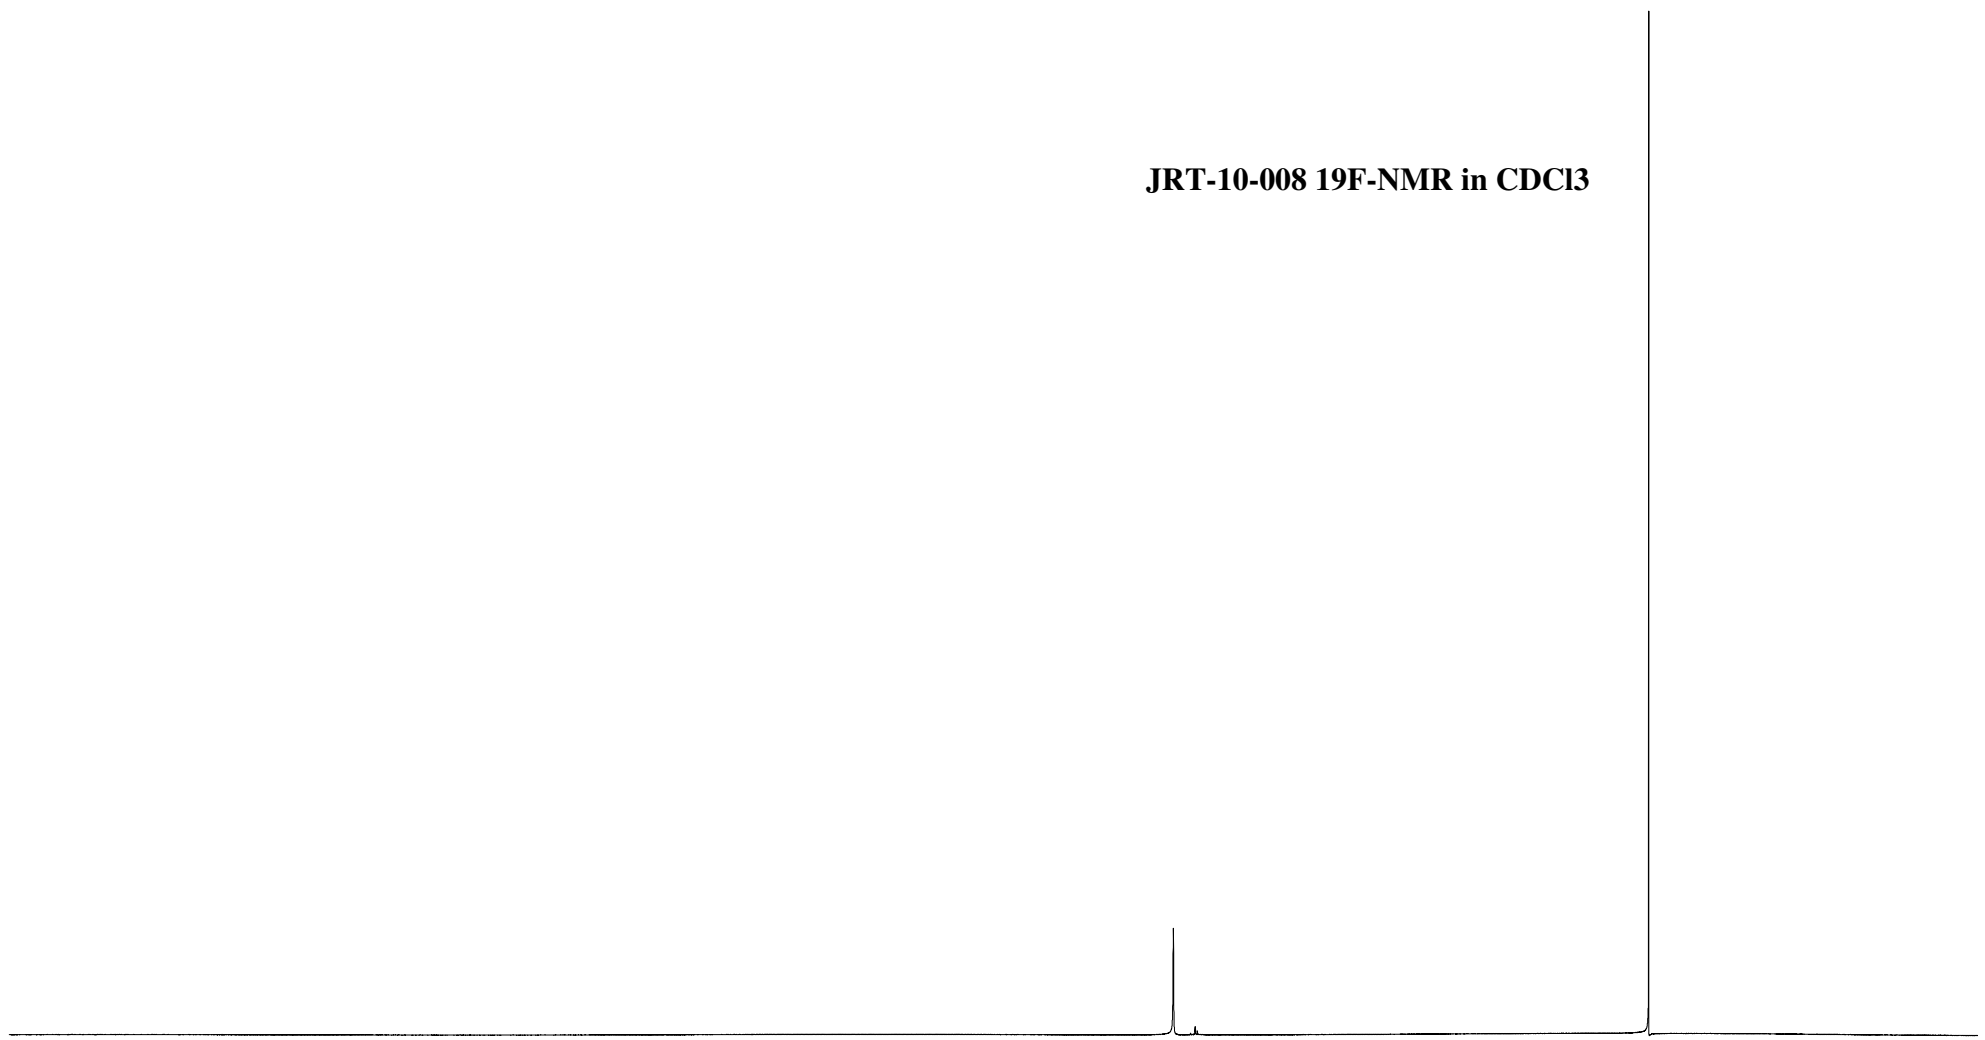

0 -20 -40 -60 -80 -100 -120 -140 -160 -180 ppm

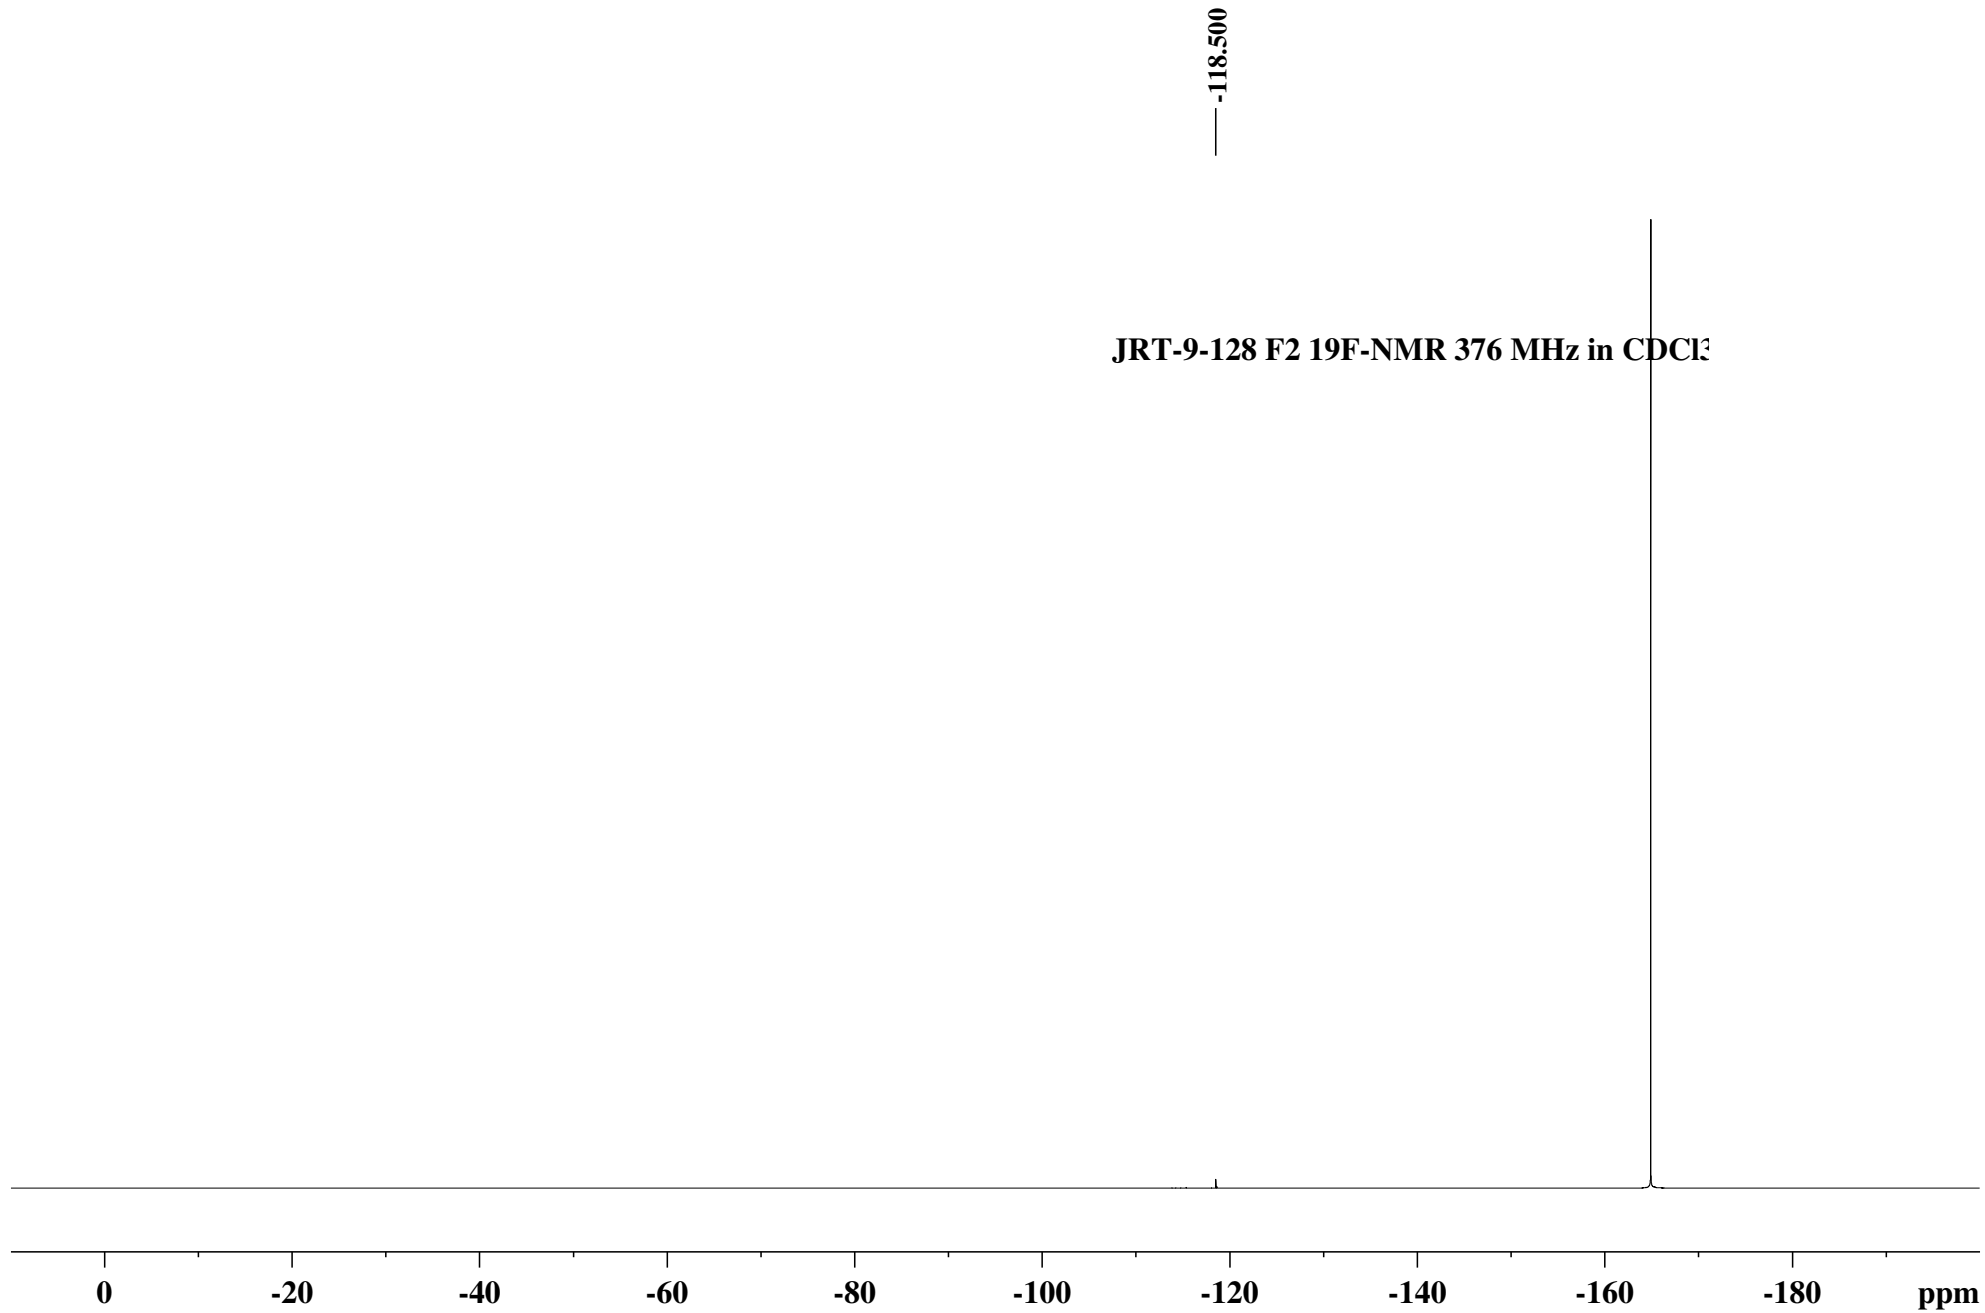

# Spectrum Peak Pick Report

07/06/2022 19:40:42

Data Set: D:\User Kittiporn\Dr.Chansak\CT- JRT.spc - RawData

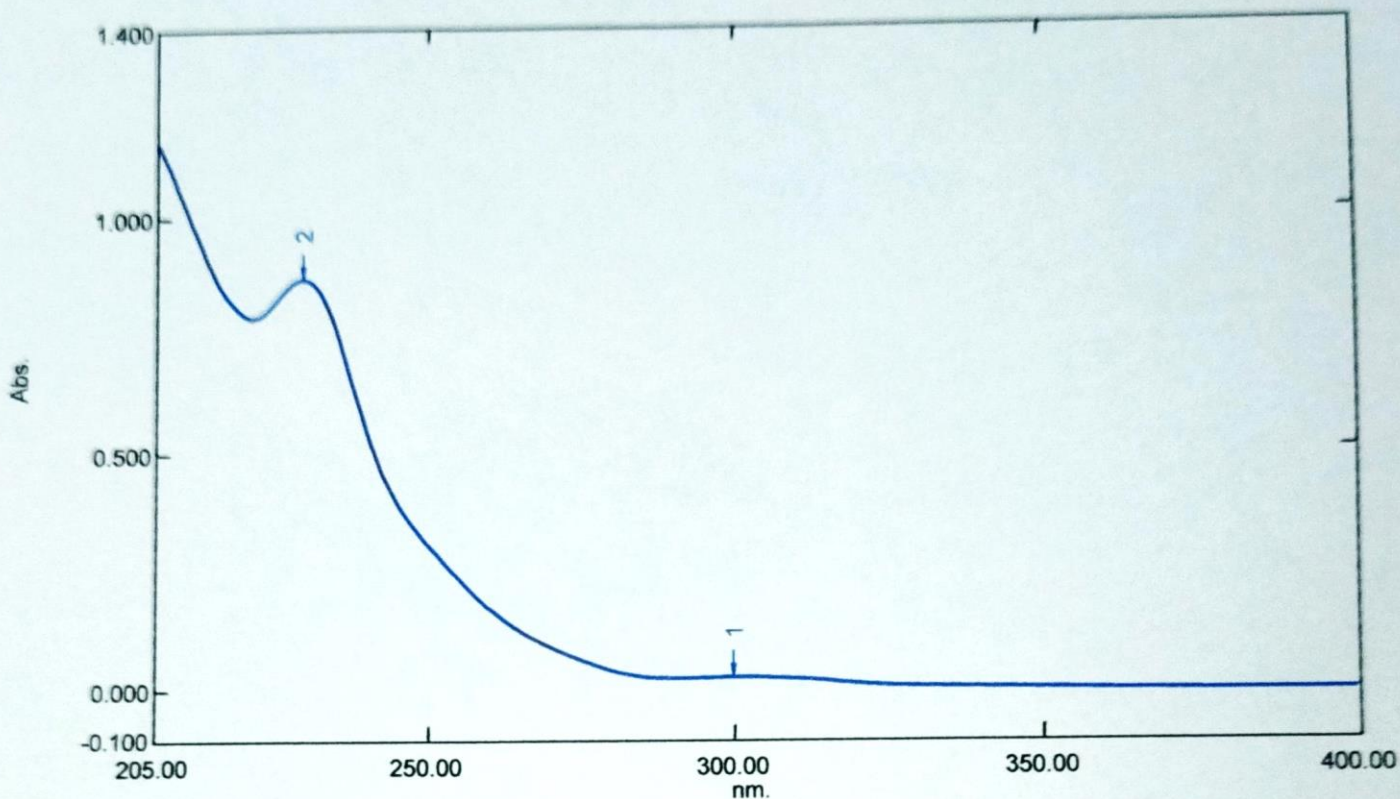

[Measurement Properties]

Wavelength Range (nm.): 205.00 to 700.00  
Scan Speed: Fast  
Sampling Interval: 0.5  
Auto Sampling Interval: Enabled  
Scan Mode: Single

| No. | P/V | Wavelength | Abs.  | Description |
|-----|-----|------------|-------|-------------|
| 1   | ●   | 300.00     | 0.028 |             |
| 2   | ●   | 229.50     | 0.871 |             |

[Instrument Properties]

Instrument Type: UV-1700 Series  
Measuring Mode: Absorbance  
Slit Width: 1.0 nm  
Light Source Change Wavelength: 340.8 nm  
S/R Exchange: Normal

[Attachment Properties]

Attachment: None

[Operation]

Threshold: 0.0010000  
Points: 4  
InterPolate: Disabled  
Average: Disabled

[Sample Preparation Properties]

Weight: 2.8 mg  
Volume: 3 ml  
Dilution: 150  
Path Length: 1 cm  
Additional Information: DR.Chansak—CT-JRT —  
Solvent MeOH —UV Cut  
off 205
